# Supplementary material for: Alkoxy and Enediyne Derivatives Containing 1,4-Benzoquinone Subunits—Synthesis and Antitumor Activity
Source: PubMed Central journal article supplement (PMC6155387; doi:10.3390/molecules22030447), 2017-03-11
Supplement: molecules-22-00447-s001.pdf [file molecules-22-00447-s001.pdf]

## Supplementary Materials

### Alkoxy and Eneidyne Derivatives Containing 1,4-Benzoquinone Subunits – Synthesis and Antitumor Activity

Monika Kadela-Tomanek, Ewa Bębenek, Elwira Chrobak, Małgorzata Latocha, Stanisław Boryczka

**Table S1:** The selectivity index (SI) value for Compounds **1-28** and cisplatin.

**Table S2:** The parameters determined by computational methods such as lipophilicity (cLogP), molecular mass (M), number of donors (nHD) and acceptors (nHA) of hydrogen bonds, number of rotatable bonds (nRTB), topological polar surface area (PSA), and penetration drug by BBB (log BB).

**Figure S1:** (a) <sup>1</sup>H-NMR spectrum, (b) <sup>13</sup>C-NMR spectrum, (c) IR spectrum, (d) HR-MS spectrum of 2-chloro-3-(2-propenoxy)-1,4-naphthoquinon (**5**).

**Figure S2:** (a) <sup>1</sup>H-NMR spectrum, (b) <sup>13</sup>C-NMR spectrum, (c) IR spectrum, (d) HR-MS spectrum of 2-chloro-3-(2-propyloxy)-1,4-naphthoquinon (**6**).

**Figure S3:** (a) <sup>1</sup>H-NMR spectrum, (b) <sup>13</sup>C-NMR spectrum, (c) IR spectrum, (d) HR-MS spectrum of 6-chloro-2-methyl-7-propoxy-5,8-quinolinedione (**10**).

**Figure S4:** (a) <sup>1</sup>H-NMR spectrum, (b) <sup>13</sup>C-NMR spectrum, (c) IR spectrum, (d) HR-MS spectrum of 6-chloro-2-methyl-7-(2-propenoxy)-5,8-quinolinedione (**11**).

**Figure S5:** (a) <sup>1</sup>H-NMR spectrum, (b) <sup>13</sup>C-NMR spectrum, (c) IR spectrum, (d) HR-MS spectrum of 6-chloro-2-methyl-7-(2-propyloxy)-5,8-quinolinedione (**12**).

**Figure S6:** (a) <sup>1</sup>H NMR spectrum, (b) <sup>13</sup>C NMR spectrum, (c) IR spectrum, (d) HR-MS spectrum of 2,3-di(2-propenoxy)-1,4-naphthoquinon (**14**).

**Figure S7:** (a) <sup>1</sup>H-NMR spectrum, (b) <sup>13</sup>C-NMR spectrum, (c) IR spectrum, (d) HR-MS spectrum of 2,3-di(2-propyloxy)-1,4-naphthoquinon (**15**).

**Figure S8:** (a) <sup>1</sup>H-NMR spectrum, (b) <sup>13</sup>C-NMR spectrum, (c) IR spectrum, (d) HR-MS spectrum of 2-methyl-6,7-dipropoxy-5,8-quinolinedione (**19**).

**Figure S9:** (a) <sup>1</sup>H-NMR spectrum, (b) <sup>13</sup>C-NMR spectrum, (c) IR spectrum, (d) HR-MS spectrum of 2-methyl-6,7-di(2-propenoxy)-5,8-quinolinedione (**20**).

**Figure S10:** (a) <sup>1</sup>H-NMR spectrum, (b) <sup>13</sup>C-NMR spectrum, (c) IR spectrum, (d) HR-MS spectrum of 2-methyl-6,7-di(2-propyloxy)-5,8-quinolinedione (**21**).

**Figure S11:** (a) <sup>1</sup>H-NMR spectrum, (b) <sup>13</sup>C-NMR spectrum, (c) IR spectrum, (d) HR-MS spectrum of 2-chloro-3-(8-hydroxy-4-octen-2,6-diynyl)-1,4-naphthoquinon (**23**).

**Figure S12:** (a) <sup>1</sup>H-NMR spectrum, (b) <sup>13</sup>C-NMR spectrum, (c) IR spectrum, (d) HR-MS spectrum of 6-chloro-7-(8-hydroxy-4-octen-2,6-diynyl)-5,8-quinolinedione (**24**).

**Figure S13:** (a) <sup>1</sup>H-NMR spectrum, (b) <sup>13</sup>C-NMR spectrum, (c) IR spectrum, (d) HR-MS spectrum of 6-chloro-7-(8-hydroxy-4-octen-2,6-diynyl)-2-methyl-5,8-quinolinedione (**25**).

**Figure S14:** (a) <sup>1</sup>H-NMR spectrum, (b) <sup>13</sup>C-NMR spectrum, (c) IR spectrum, (d) HR-MS spectrum of 8-octen-6,10-diynyl-1,4-dioxocyclododeca[2,3-g]-1,4-naphthoquinon (**26**).

**Figure S15:** (a) <sup>1</sup>H-NMR spectrum, (b) <sup>13</sup>C-NMR spectrum, (c) IR spectrum, (d) HR-MS spectrum of 8-octen-6,10-diynyl-1,4-dioxocyclododeca[2,3-g]-5,8-quinolinedione (**27**).

**Figure S16:** (a) <sup>1</sup>H-NMR spectrum, (b) <sup>13</sup>C-NMR spectrum, (c) IR spectrum, (d) HR-MS spectrum of 8-octen-6,10-diynyl-1,4-dioxocyclododeca[2,3-g]-2-methyl-5,8-quinolinedione (**28**).

**Table S1:** The selectivity index (SI) value for Compounds **1-28** and cisplatin.

| Compound         | SI ( $IC_{50}$ HFF-1/ $IC_{50}$ cancer line) |        |            |
|------------------|----------------------------------------------|--------|------------|
|                  | C-32                                         | SNB-19 | MDA-MB-231 |
| 1                | 0.62                                         | 0.59   | 0.49       |
| 2                | 0.69                                         | 0.60   | 0.63       |
| 3                | 0.95                                         | 0.63   | 0.43       |
| 4                | 0.88                                         | 0.80   | 10.57      |
| 5                | 0.95                                         | 1.00   | 0.55       |
| 6                | 1.22                                         | 0.46   | 0.19       |
| 7                | -                                            | -      | -          |
| 8                | -                                            | -      | -          |
| 9                | 10.31                                        | 0.16   | 0.15       |
| 10               | 0.59                                         | 0.80   | 0.71       |
| 11               | 0.12                                         | 0.59   | 0.82       |
| 12               | 0.07                                         | 0.72   | 0.81       |
| 13               | 0.48                                         | 0.54   | 0.48       |
| 14               | 0.42                                         | 0.22   | 0.25       |
| 15               | 0.62                                         | 0.73   | 5.19       |
| 16               | -                                            | -      | -          |
| 17               | -                                            | -      | -          |
| 18               | 50.40                                        | 0.58   | 7.00       |
| 19               | 0.14                                         | 0.69   | 0.25       |
| 20               | 0.03                                         | 0.04   | 0.02       |
| 21               | 0.69                                         | 0.59   | 0.63       |
| 22               | 1.64                                         | 1.04   | 1.85       |
| 23               | 0.67                                         | 0.52   | 0.23       |
| 24               | -                                            | -      | -          |
| 25               | 0.23                                         | 0.16   | 0.61       |
| 26               | 0.58                                         | 0.77   | 0.11       |
| 27               | 0.27                                         | 0.41   | 1.93       |
| 28               | 0.18                                         | 0.18   | 6.25       |
| <b>cisplatin</b> | 0.55                                         | 0.48   | 2.80       |

**Table S2:** The parameters determined by computational methods such as lipophilicity (cLogP), molecular mass (M), number of donors (nHD) and acceptors (nHA) of hydrogen bonds, number of rotatable bonds (nRTB), topological polar surface area (PSA), and penetration drug by BBB (log BB).

| Compound | M<br>[g/mol] | clogP | nHA | nHD | nRTB | PSA<br>[Å <sup>2</sup> ] | logBB  |
|----------|--------------|-------|-----|-----|------|--------------------------|--------|
| 1        | 227          | 2.55  | 2   | 0   | 0    | 34.14                    | - 0.45 |
| 2        | 242          | 2.69  | 3   | 0   | 0    | 47.03                    | - 0.61 |
| 3        | 227          | 2.17  | 3   | 0   | 0    | 47.03                    | - 0.25 |
| 4        | 250          | 2.33  | 3   | 0   | 3    | 43.38                    | - 0.36 |
| 5        | 248          | 2.59  | 3   | 0   | 3    | 43.38                    | - 0.16 |
| 6        | 246          | 2.21  | 3   | 0   | 2    | 43.38                    | - 0.71 |
| 7        | 266          | 2.41  | 4   | 0   | 3    | 56.27                    | - 0.42 |
| 8        | 264          | 2.29  | 4   | 0   | 3    | 56.27                    | - 0.14 |
| 9        | 263          | 1.75  | 4   | 0   | 2    | 56.27                    | - 0.85 |
| 10       | 251          | 1.95  | 4   | 0   | 3    | 56.27                    | - 0.19 |
| 11       | 249          | 1.57  | 4   | 0   | 3    | 56.27                    | - 0.04 |
| 12       | 247          | 1.15  | 4   | 0   | 2    | 56.27                    | - 0.76 |
| 13       | 275          | 2.57  | 4   | 0   | 6    | 52.61                    | - 0.06 |
| 14       | 271          | 2.28  | 4   | 0   | 6    | 52.61                    | - 0.06 |
| 15       | 266          | 1.77  | 4   | 0   | 4    | 52.61                    | - 1.25 |
| 16       | 290          | 2.20  | 5   | 0   | 6    | 65.50                    | - 0.21 |
| 17       | 287          | 1.84  | 5   | 0   | 6    | 65.50                    | - 0.10 |
| 18       | 284          | 1.49  | 5   | 0   | 4    | 65.50                    | - 1.27 |
| 19       | 278          | 2.06  | 5   | 0   | 6    | 65.50                    | - 0.06 |
| 20       | 271          | 1.84  | 5   | 0   | 6    | 65.50                    | - 0.06 |
| 21       | 367          | 1.02  | 5   | 0   | 4    | 65.50                    | - 1.16 |
| 22       | 136          | 1.01  | 2   | 2   | 0    | 40.46                    | - 0.57 |
| 23       | 326          | 3.20  | 4   | 1   | 2    | 63.60                    | - 0.54 |
| 24       | 328          | 2.57  | 5   | 1   | 2    | 76.50                    | - 0.83 |
| 25       | 342          | 2.23  | 5   | 1   | 2    | 76.50                    | - 0.69 |
| 26       | 291          | 3.23  | 4   | 0   | 0    | 52.61                    | - 0.41 |
| 27       | 292          | 2.45  | 5   | 0   | 0    | 65.50                    | - 0.70 |
| 28       | 306          | 2.15  | 5   | 0   | 0    | 65.50                    | - 0.57 |

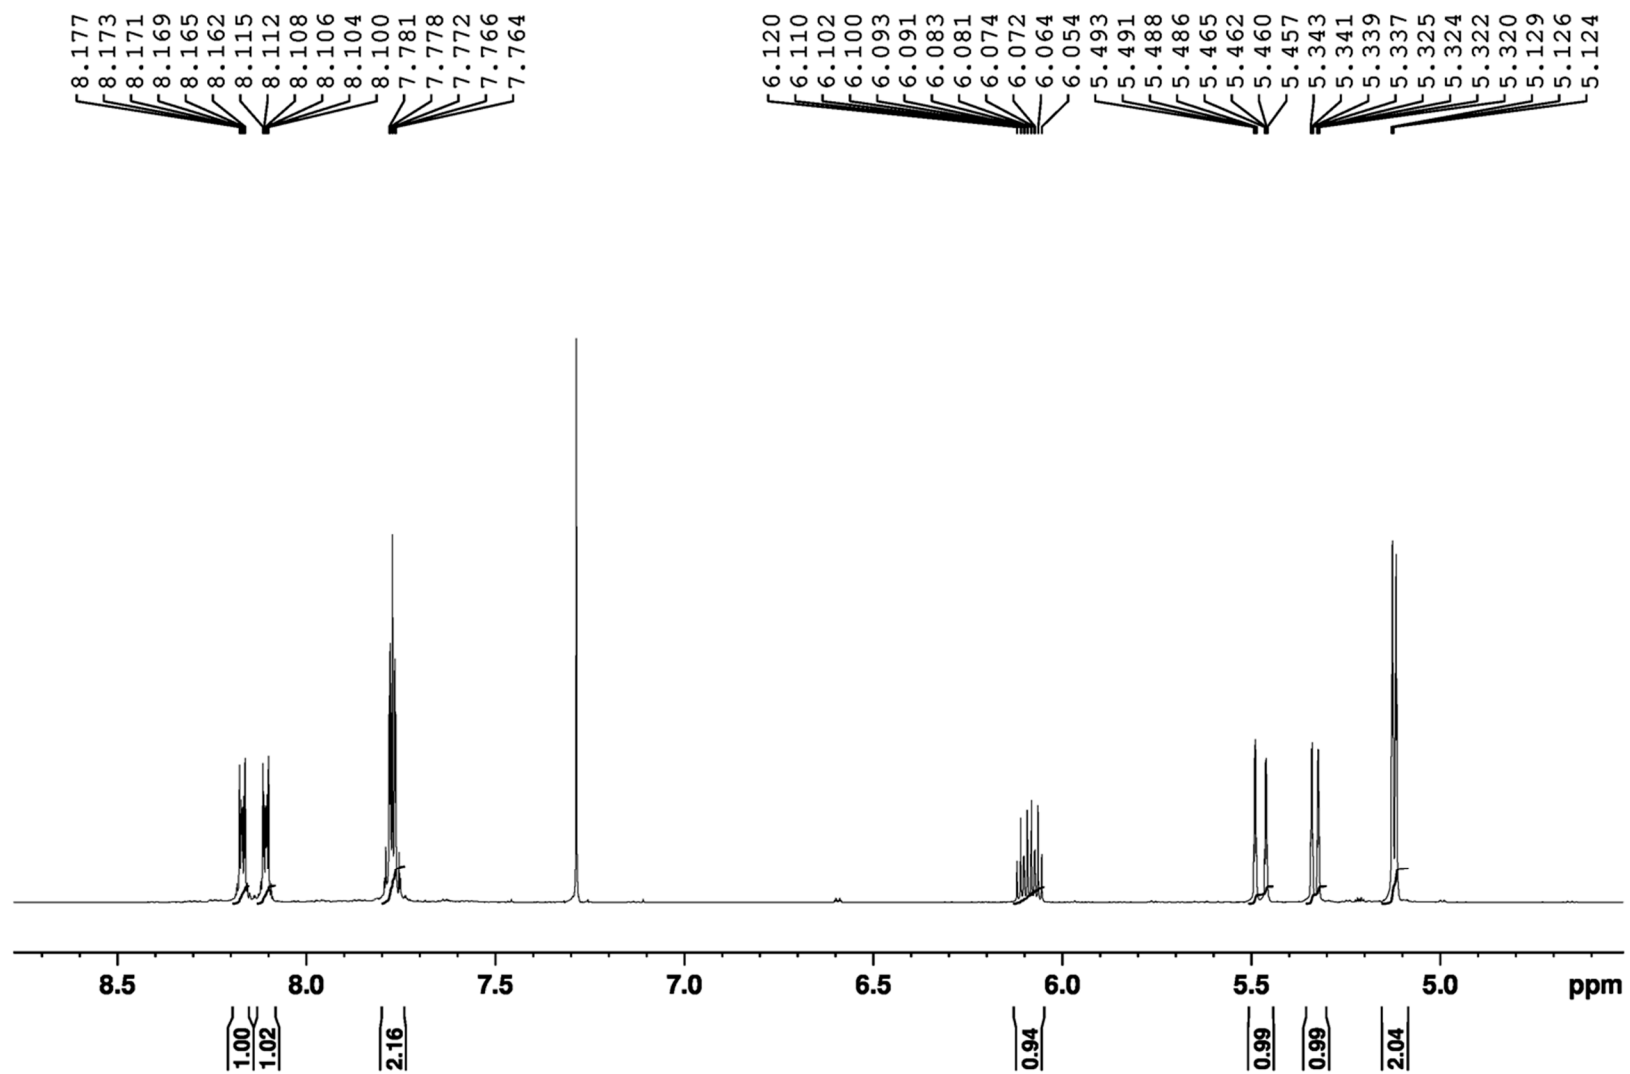

Figure S1 (a): <sup>1</sup>H-NMR spectrum of 2-chloro-3-(2-propenoxy)-1,4-naphthoquinon (5).

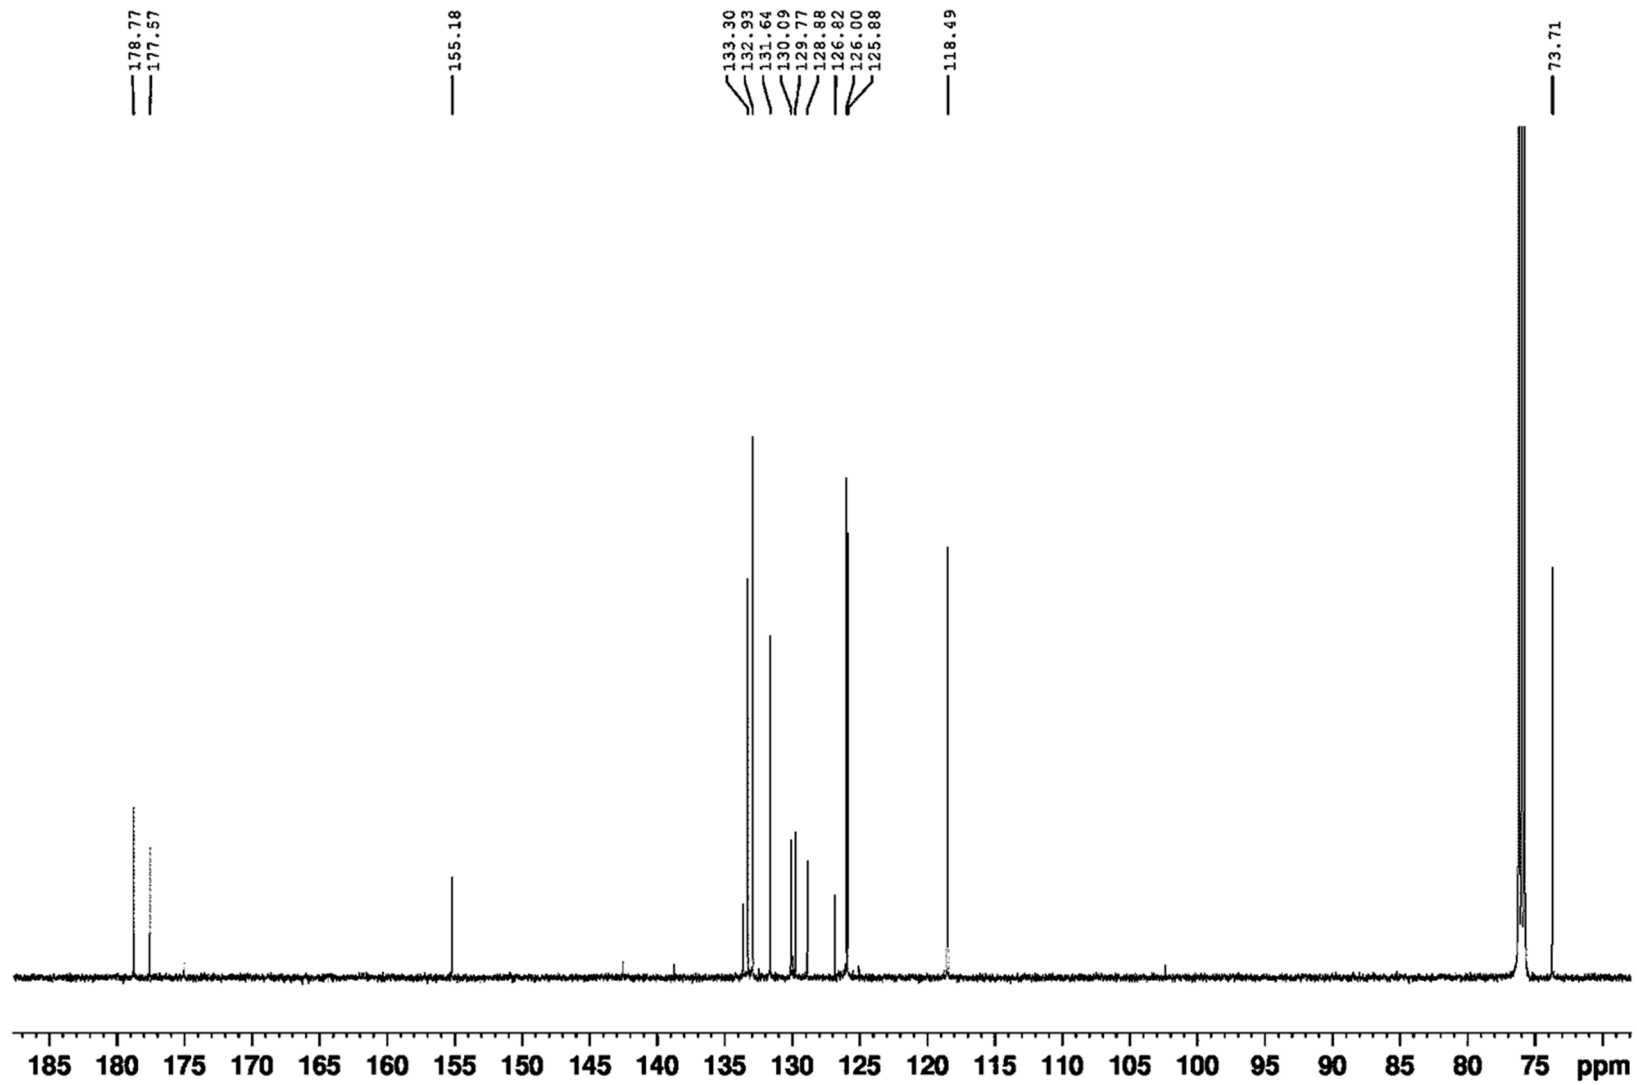

Figure S1 (b):  $^{13}\text{C}$ -NMR spectrum of 2-chloro-3-(2-propenoxy)-1,4-naphthoquinon (5).

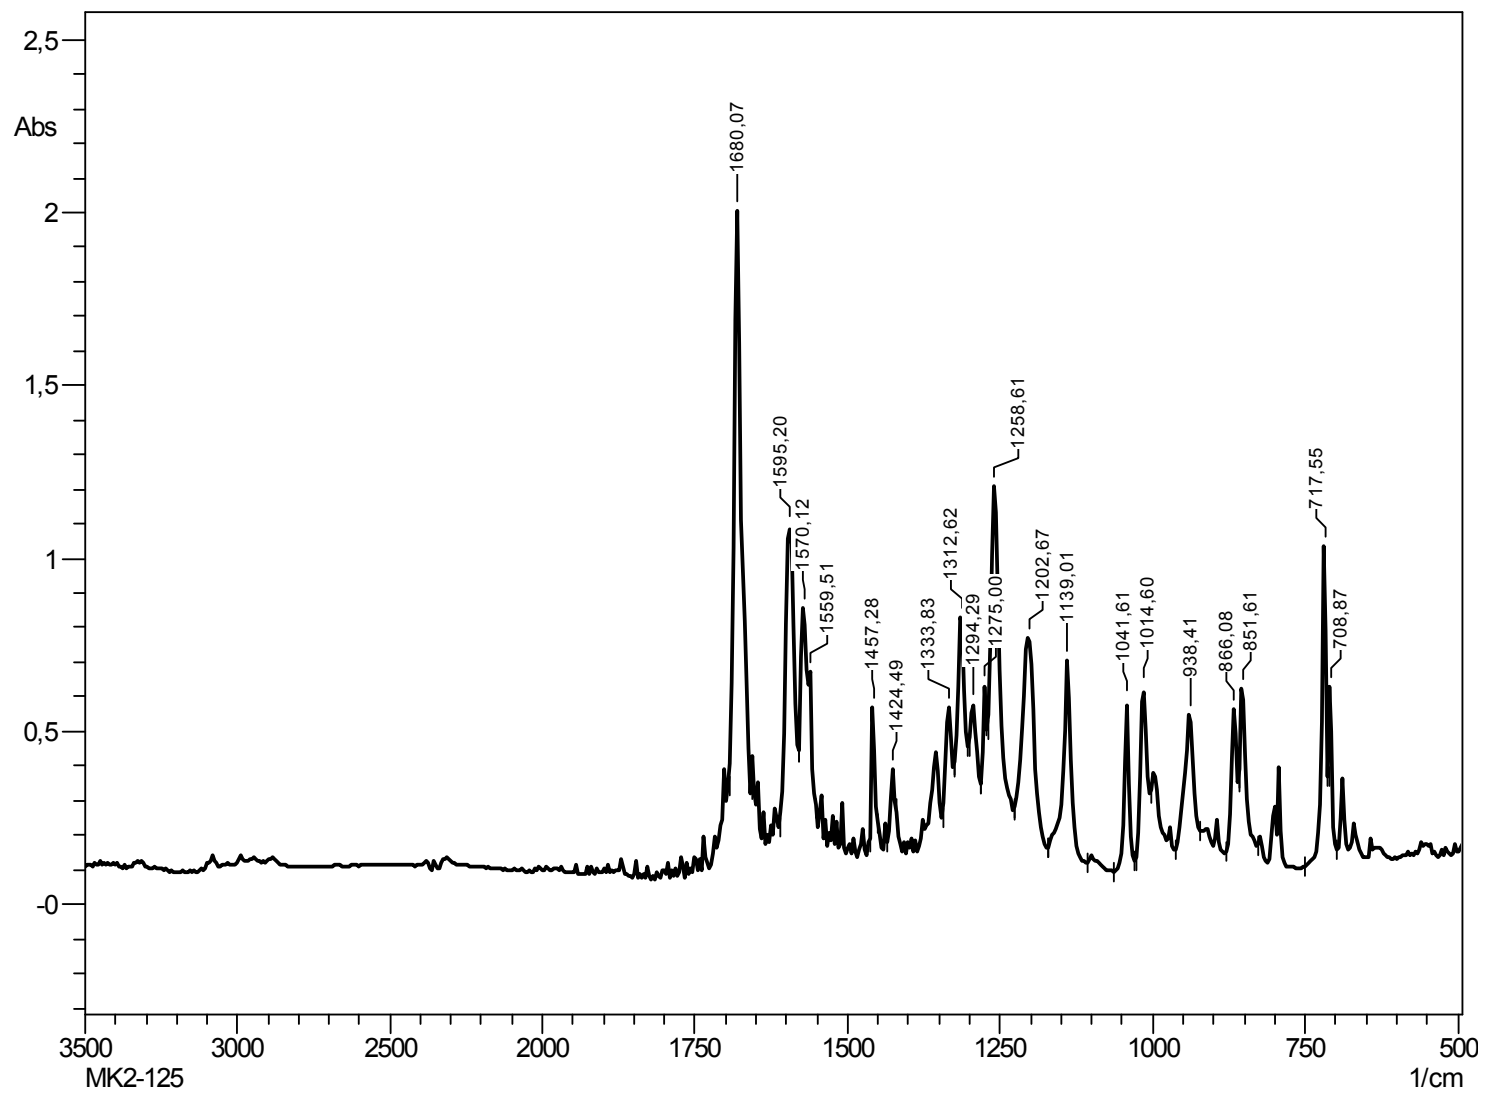

Figure S1 (c): IR spectrum of 2-chloro-3-(2-propenoxy)-1,4-naphthoquinon (5).

# Compound Spectrum List Report

## Analysis Info

Analysis Name D:\Data\mk5.d  
Method low\_mass.m  
Sample Name TM Low concentration  
Comment

Acquisition Date 2/17/2017 11:21:14 AM  
Operator KM  
Instrument impact II 1825265.10082

## Acquisition Parameter

|             |          |                      |          |                  |           |
|-------------|----------|----------------------|----------|------------------|-----------|
| Source Type | ESI      | Ion Polarity         | Positive | Set Nebulizer    | 0.3 Bar   |
| Focus       | Active   | Set Capillary        | 4000 V   | Set Dry Heater   | 240 °C    |
| Scan Begin  | 100 m/z  | Set End Plate Offset | -500 V   | Set Dry Gas      | 4.0 l/min |
| Scan End    | 1000 m/z | Set Charging Voltage | 2000 V   | Set Divert Valve | Source    |
|             |          | Set Corona           | 0 nA     | Set APCI Heater  | 0 °C      |

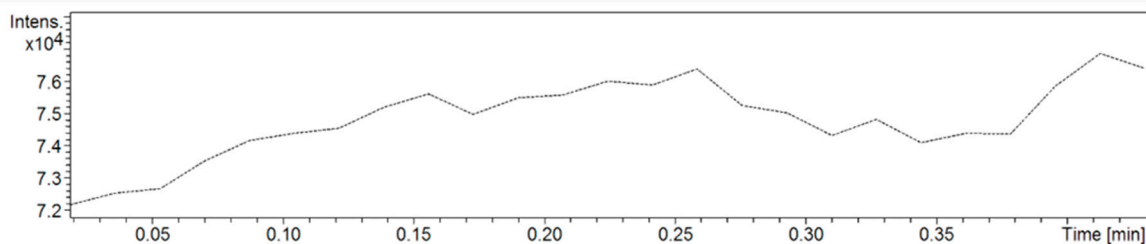

## +MS, 0.0-0.4min #1-25

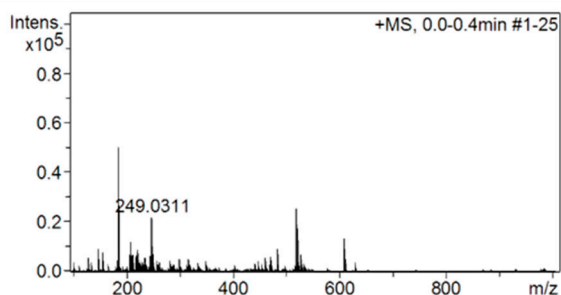

| # | m/z      | Res.  | S/N   | I     | I %   | FWHM   |
|---|----------|-------|-------|-------|-------|--------|
| 1 | 249.0311 | 20814 | 950.2 | 22188 | 100.0 | 0.0120 |

Figure S1 (d): HR-MS spectrum of 2-chloro-3-(2-propenoxy)-1,4-naphthoquinon (5).

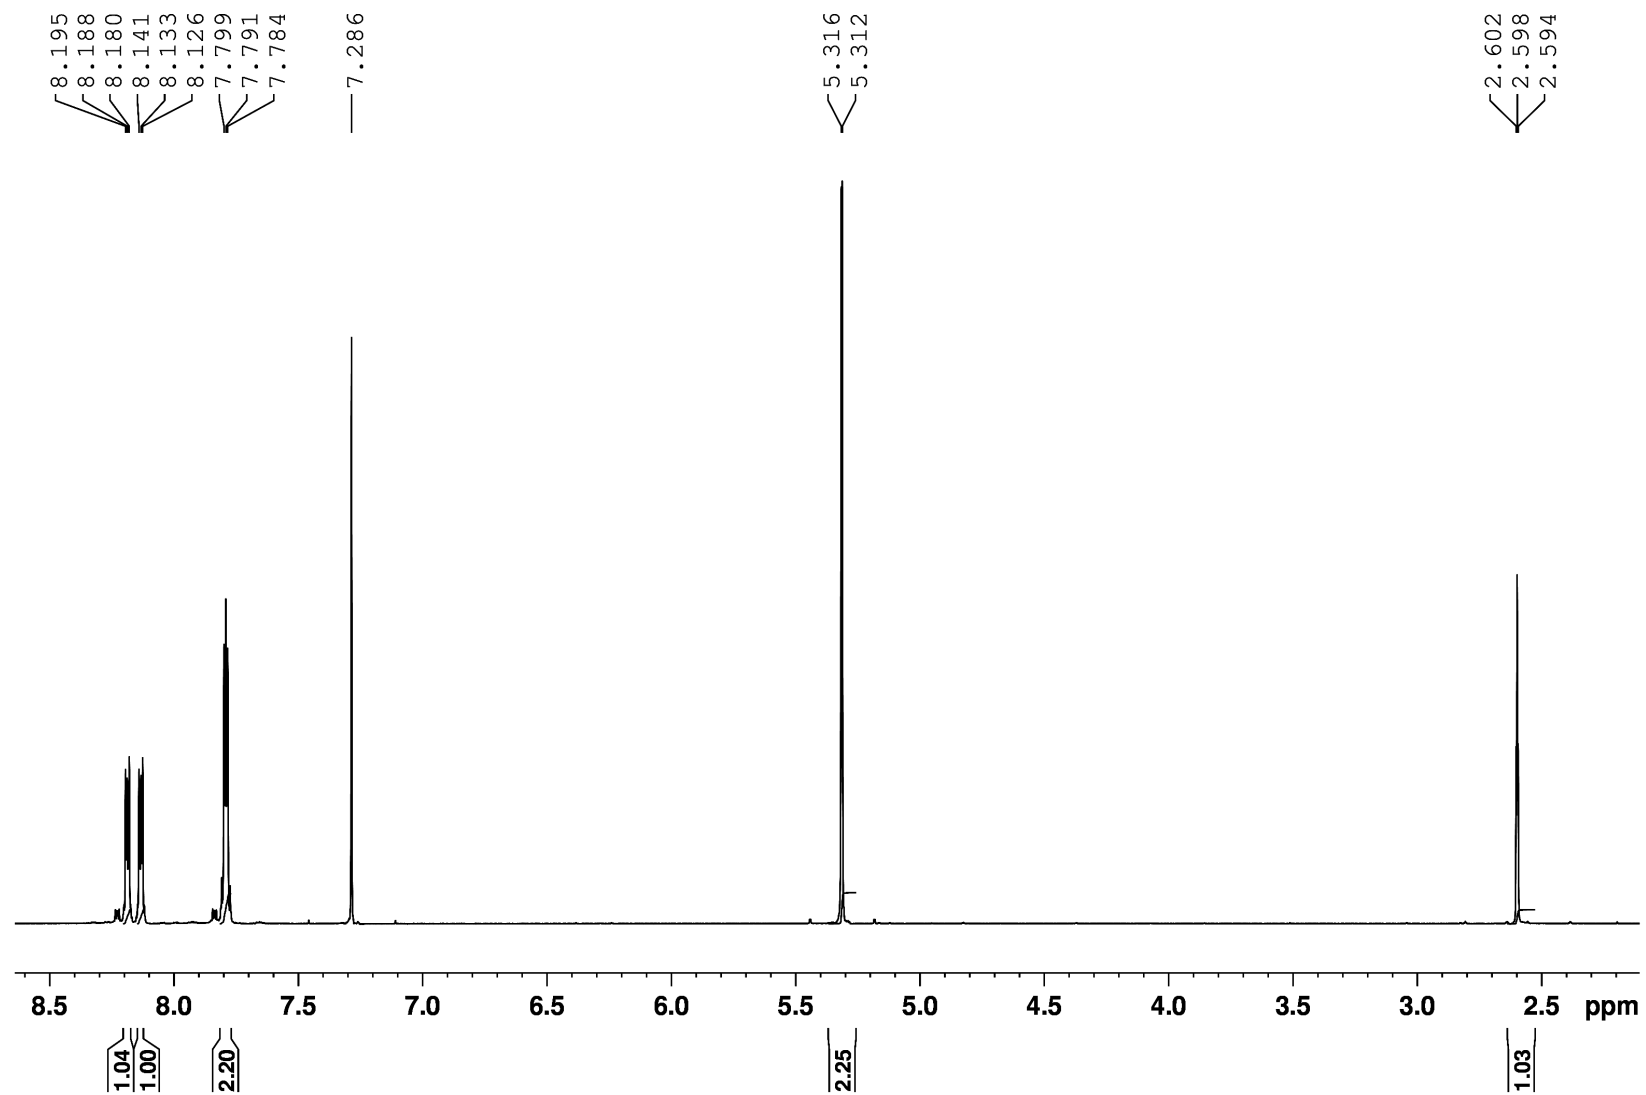

Figure S2 (a): <sup>1</sup>H-NMR spectrum of 2-chloro-3-(2-propynyloxy)-1,4-naphthoquinone (6).



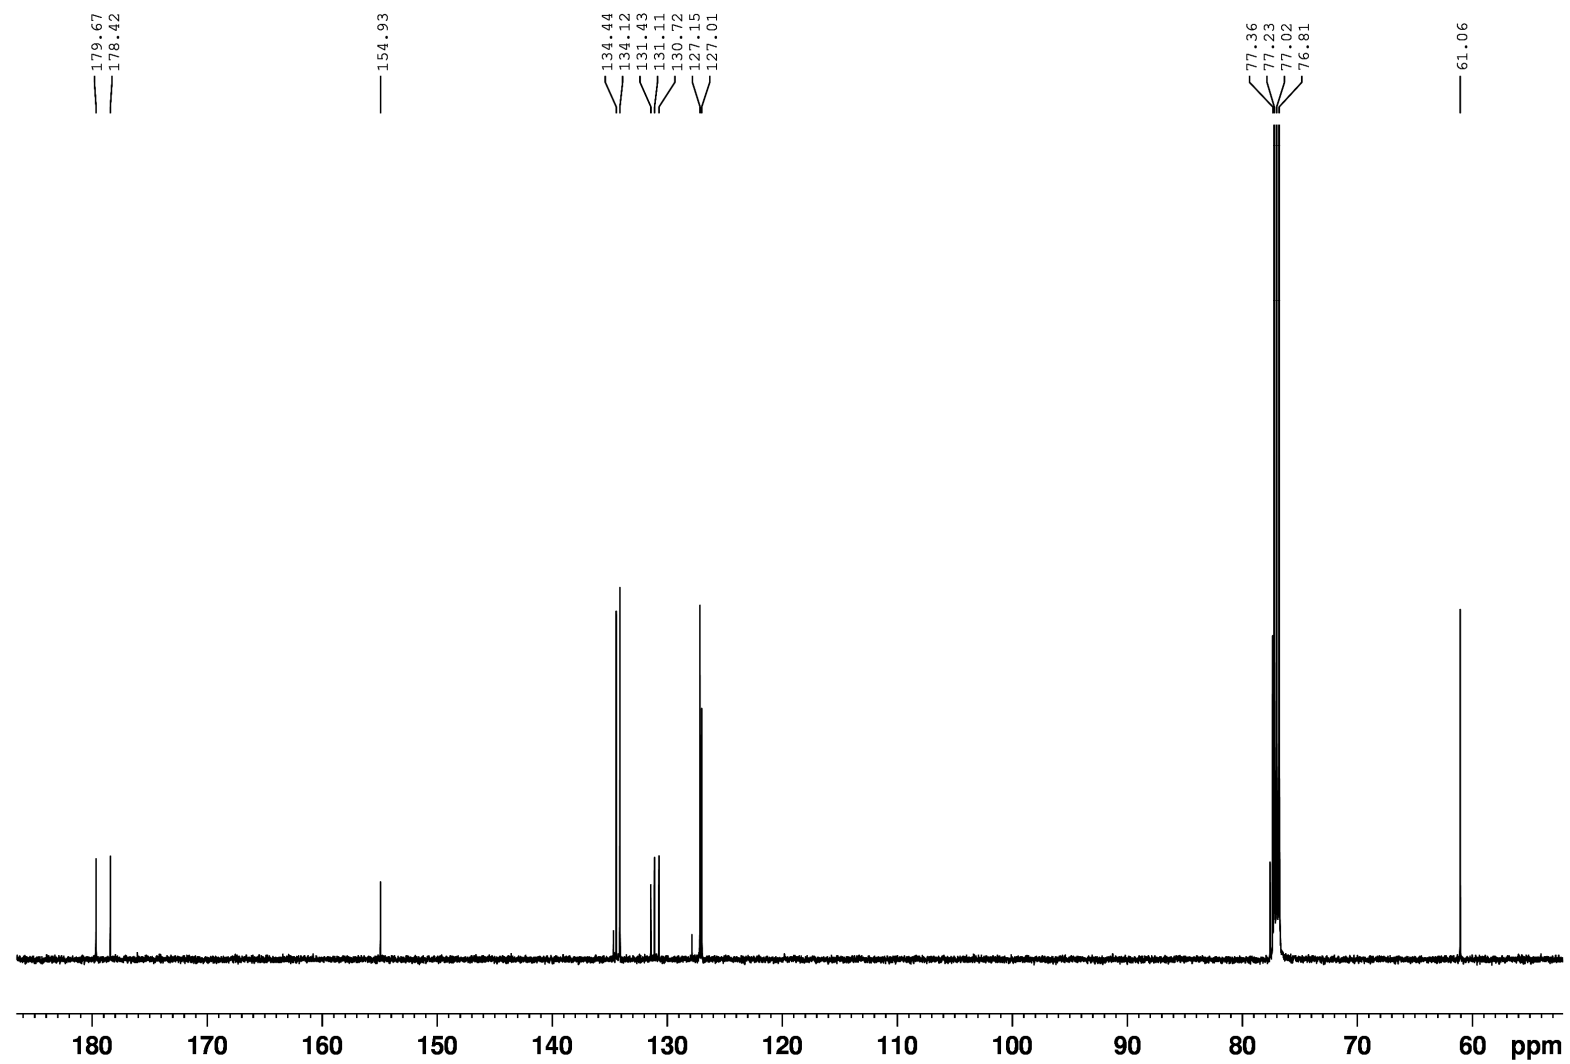

Figure S2 (b):  $^{13}\text{C}$ -NMR spectrum of 2-chloro-3-(2-propynyloxy)-1,4-naphthoquinone (6).

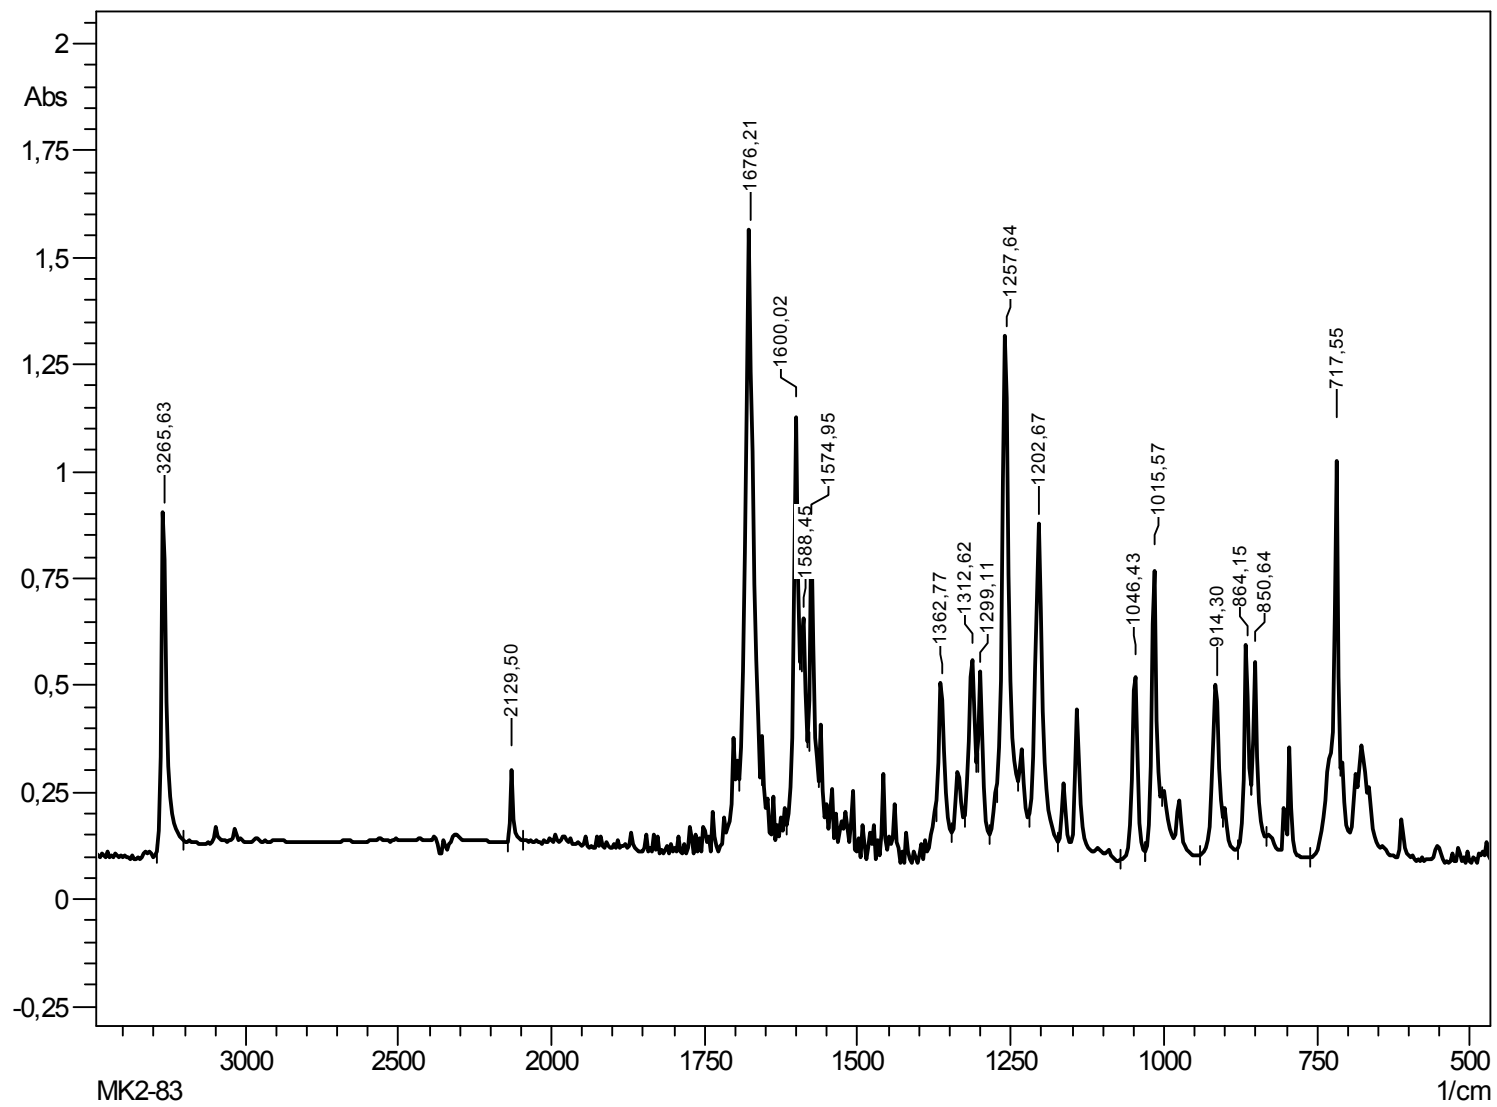

Figure S2 (c): IR spectrum of 2-chloro-3-(2-propyloxy)-1,4-naphthoquinone (6).

# Compound Spectrum List Report

## Analysis Info

Analysis Name D:\Data\mk6.d  
Method low\_mass.m  
Sample Name TM Low concentration  
Comment

Acquisition Date 2/17/2017 11:25:36 AM  
Operator KM  
Instrument impact II 1825265.10082

## Acquisition Parameter

|             |          |                      |          |                  |           |
|-------------|----------|----------------------|----------|------------------|-----------|
| Source Type | ESI      | Ion Polarity         | Positive | Set Nebulizer    | 0.3 Bar   |
| Focus       | Active   | Set Capillary        | 4000 V   | Set Dry Heater   | 240 °C    |
| Scan Begin  | 100 m/z  | Set End Plate Offset | -500 V   | Set Dry Gas      | 4.0 l/min |
| Scan End    | 1000 m/z | Set Charging Voltage | 2000 V   | Set Divert Valve | Source    |
|             |          | Set Corona           | 0 nA     | Set APCI Heater  | 0 °C      |

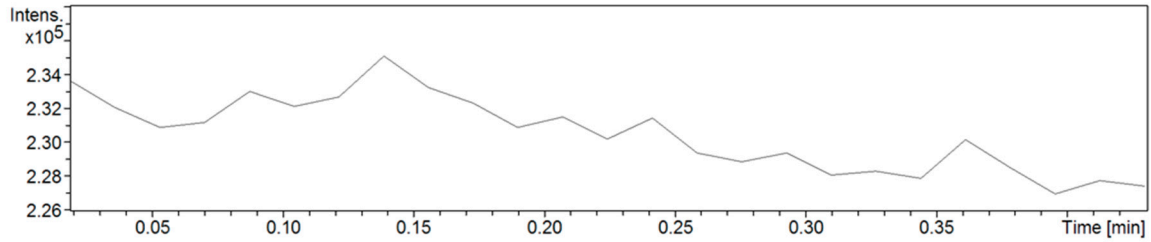

## +MS, 0.0-0.4min #1-25

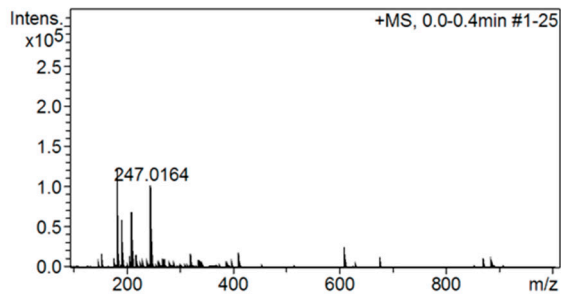

| # | m/z      | Res.  | S/N    | I      | I%    | FWHM   |
|---|----------|-------|--------|--------|-------|--------|
| 1 | 247.0164 | 24713 | 3330.4 | 101661 | 100.0 | 0.0100 |

**Figure S2 (d):** HR-MS spectrum of 2-chloro-3-(2-propyloxy)-1,4-naphthoquinon (6).

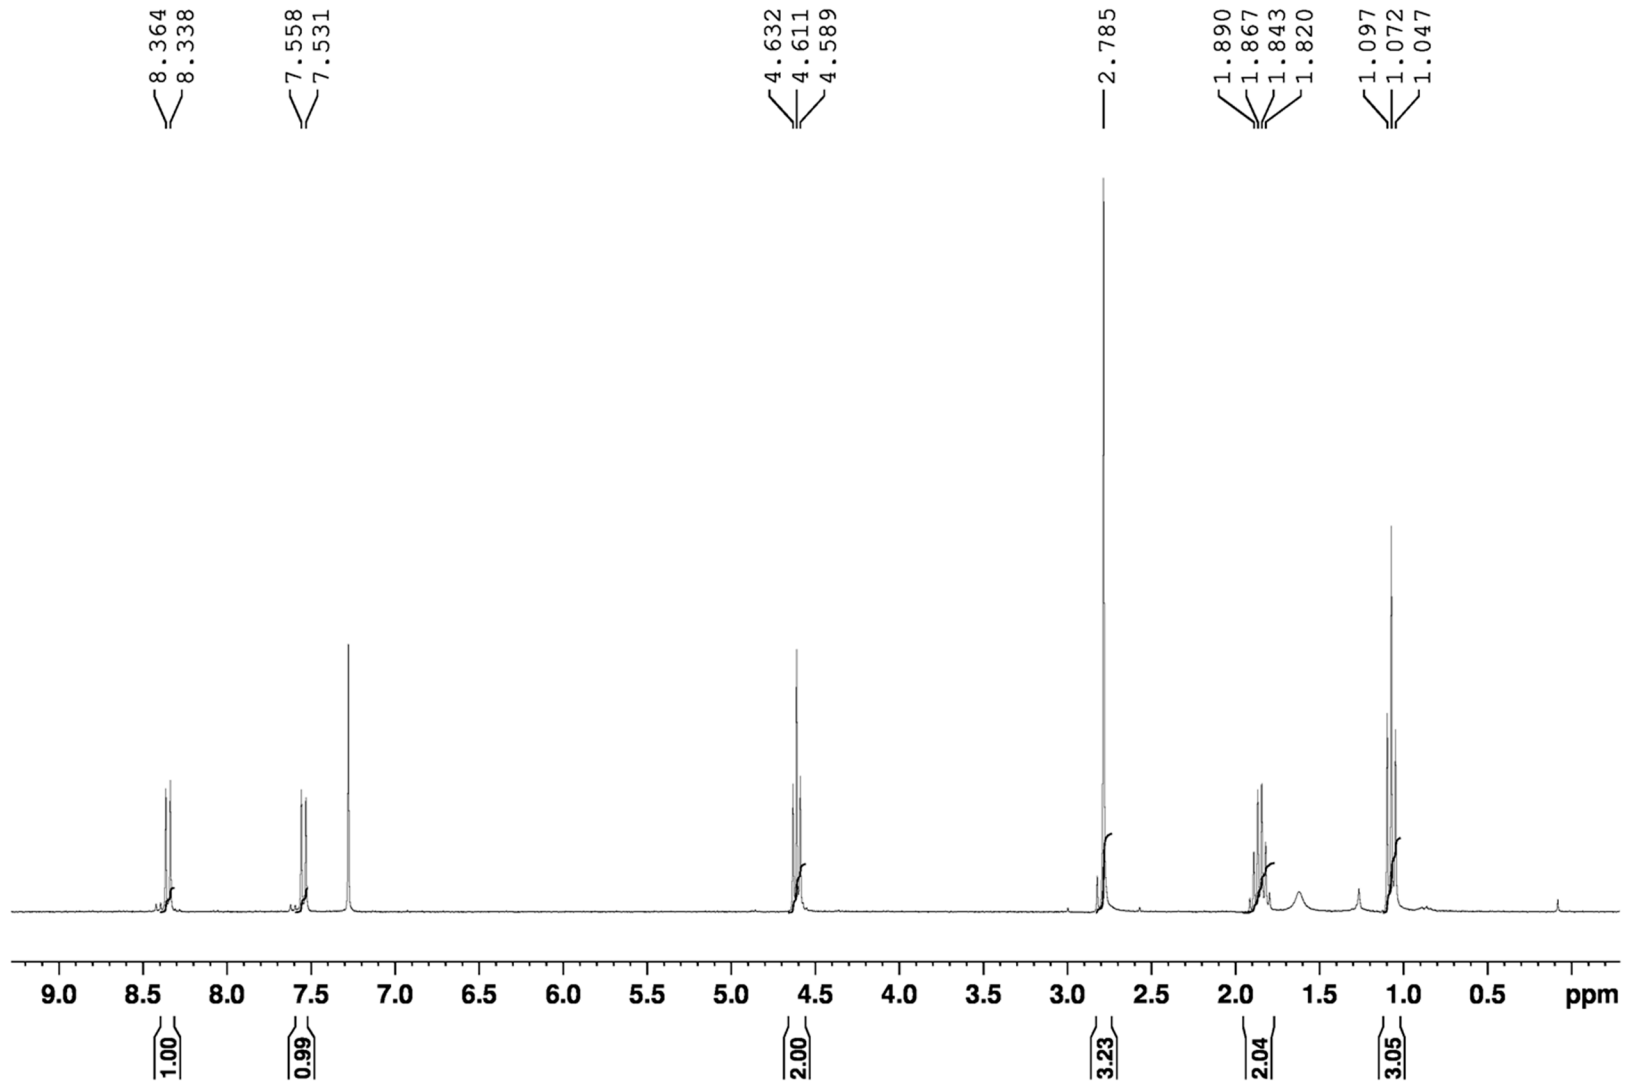

Figure S3 (a): <sup>1</sup>H-NMR spectrum of 6-chloro-2-methyl-7-propoxy-5,8-quinolinedione (10).

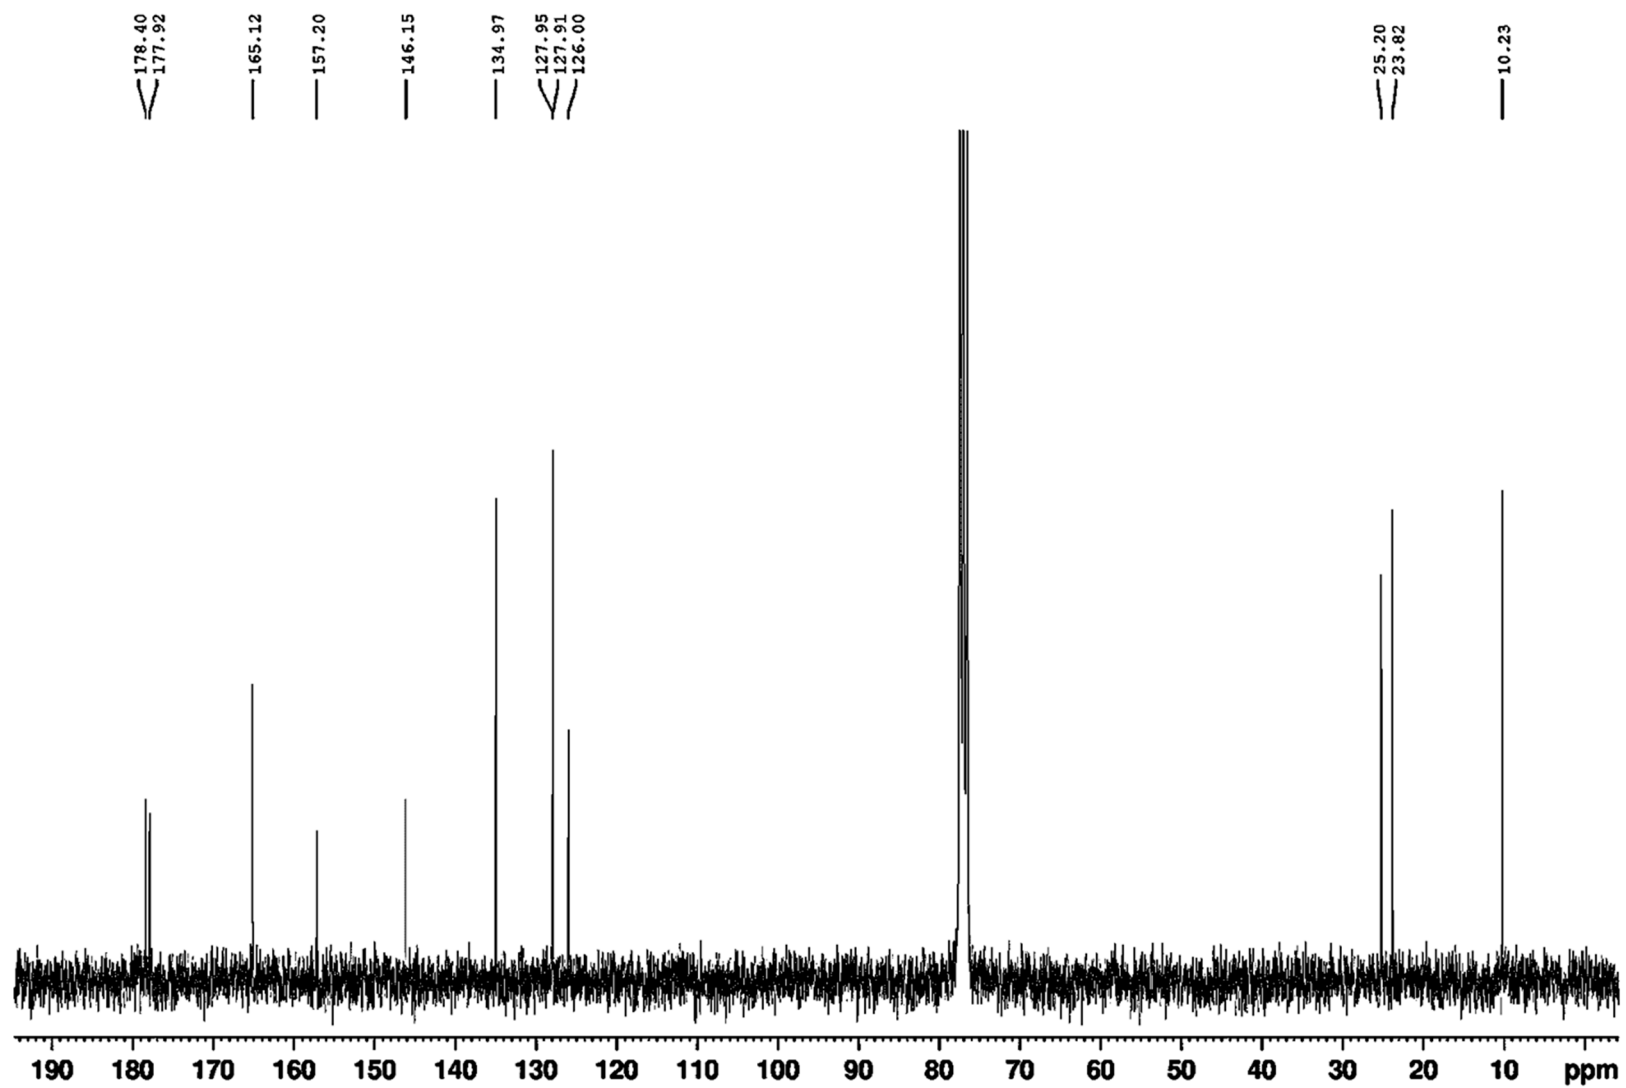

Figure S3 (b):  $^{13}\text{C}$ -NMR spectrum of 6-chloro-2-methyl-7-propoxy-5,8-quinolinedione (10).

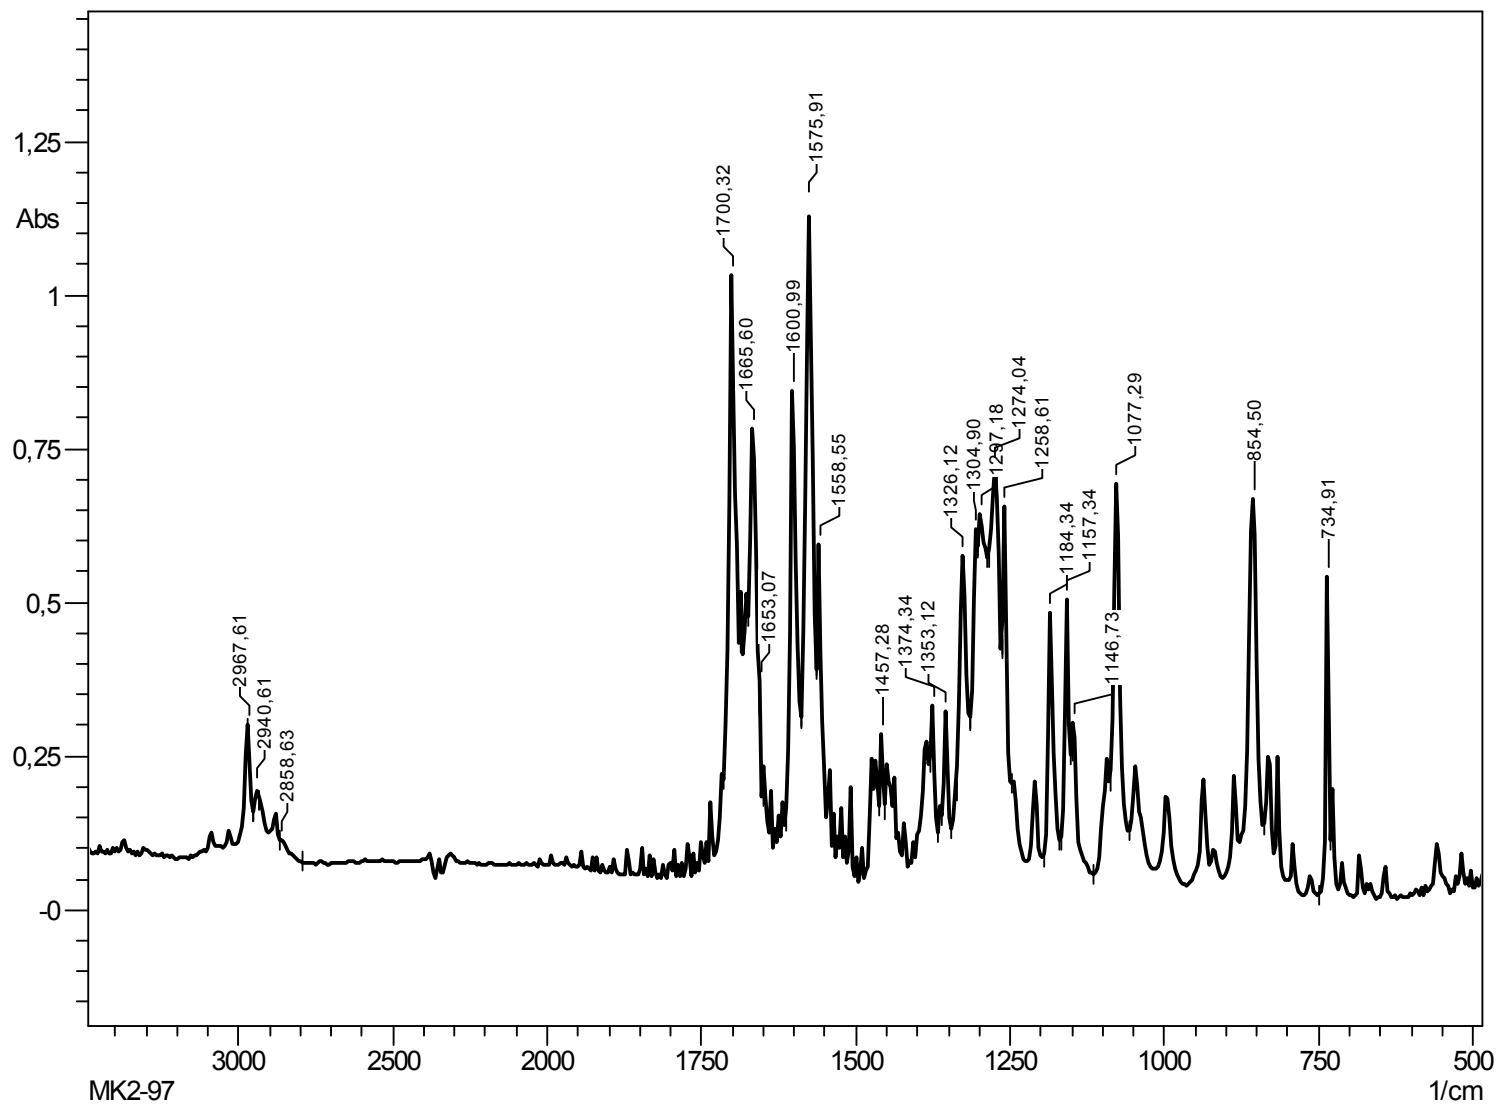

Figure S3 (c): IR spectrum of 6-chloro-2-methyl-7-propoxy-5,8-quinolinedione (10).

# Compound Spectrum List Report

## Analysis Info

Analysis Name D:\Data\mk10.d  
Method low\_mass.m  
Sample Name TM Low concentration  
Comment

Acquisition Date 2/17/2017 11:28:53 AM  
Operator KM  
Instrument impact II 1825265.10082

## Acquisition Parameter

|             |          |                      |          |                  |           |
|-------------|----------|----------------------|----------|------------------|-----------|
| Source Type | ESI      | Ion Polarity         | Positive | Set Nebulizer    | 0.3 Bar   |
| Focus       | Active   | Set Capillary        | 4000 V   | Set Dry Heater   | 240 °C    |
| Scan Begin  | 100 m/z  | Set End Plate Offset | -500 V   | Set Dry Gas      | 4.0 l/min |
| Scan End    | 1000 m/z | Set Charging Voltage | 2000 V   | Set Divert Valve | Source    |
|             |          | Set Corona           | 0 nA     | Set APCI Heater  | 0 °C      |

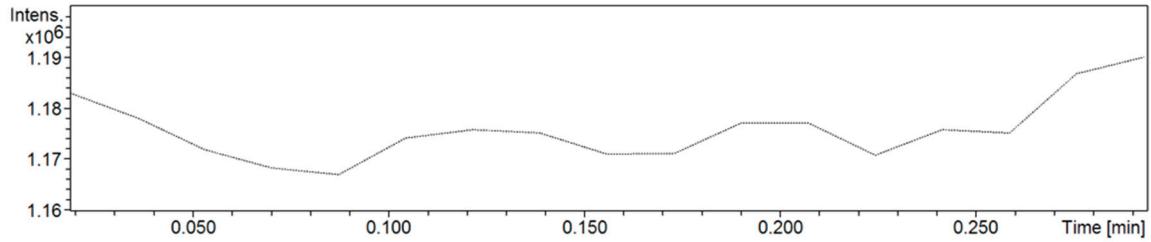

## +MS, 0.0-0.3min #1-17

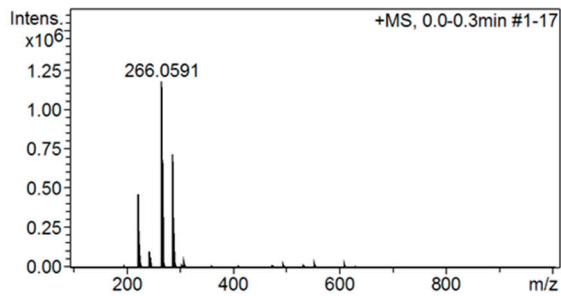

| # | m/z      | Res.  | S/N     | I       | I%    | FWHM   |
|---|----------|-------|---------|---------|-------|--------|
| 1 | 266.0591 | 31312 | 30530.3 | 1175831 | 100.0 | 0.0085 |

Figure S3 (d): HR-MS spectrum of 6-chloro-2-methyl-7-propoxy-5,8-quinolinedione (10).

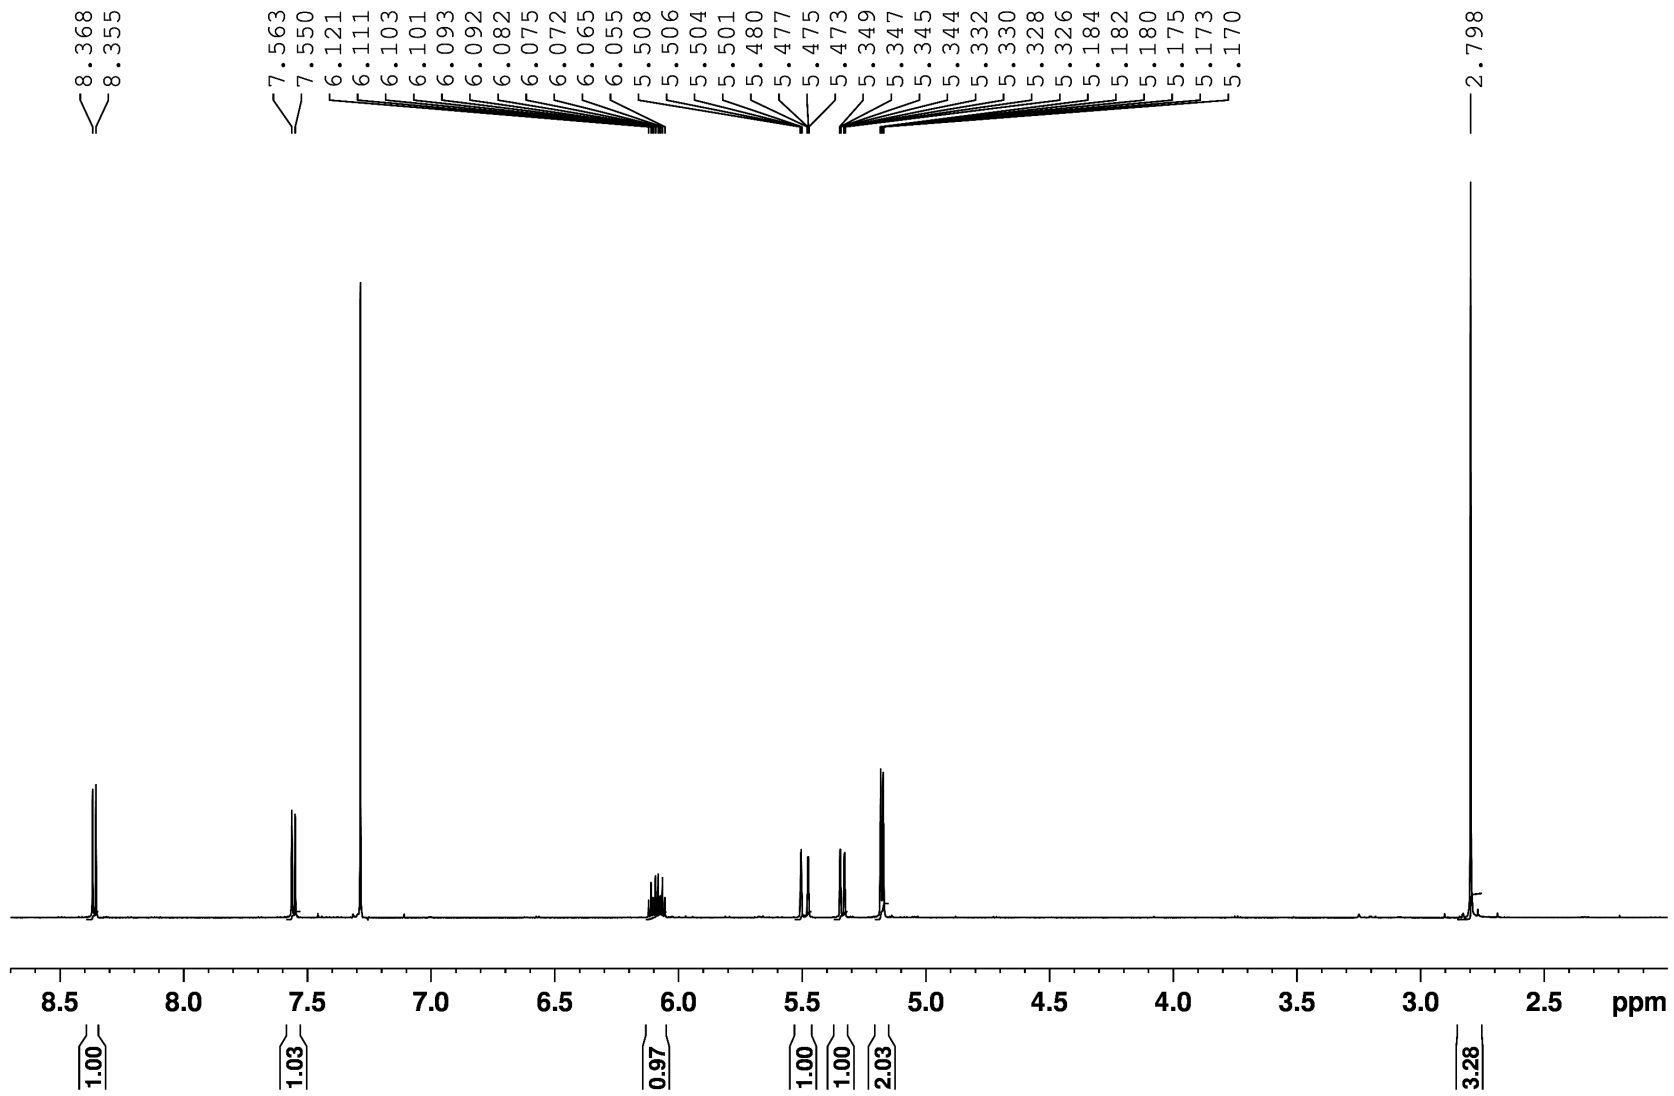

Figure S4 (a):  $^1\text{H-NMR}$  spectrum of 6-chloro-2-methyl-7-(2-propenoxy)-5,8-quinolinedione (11).



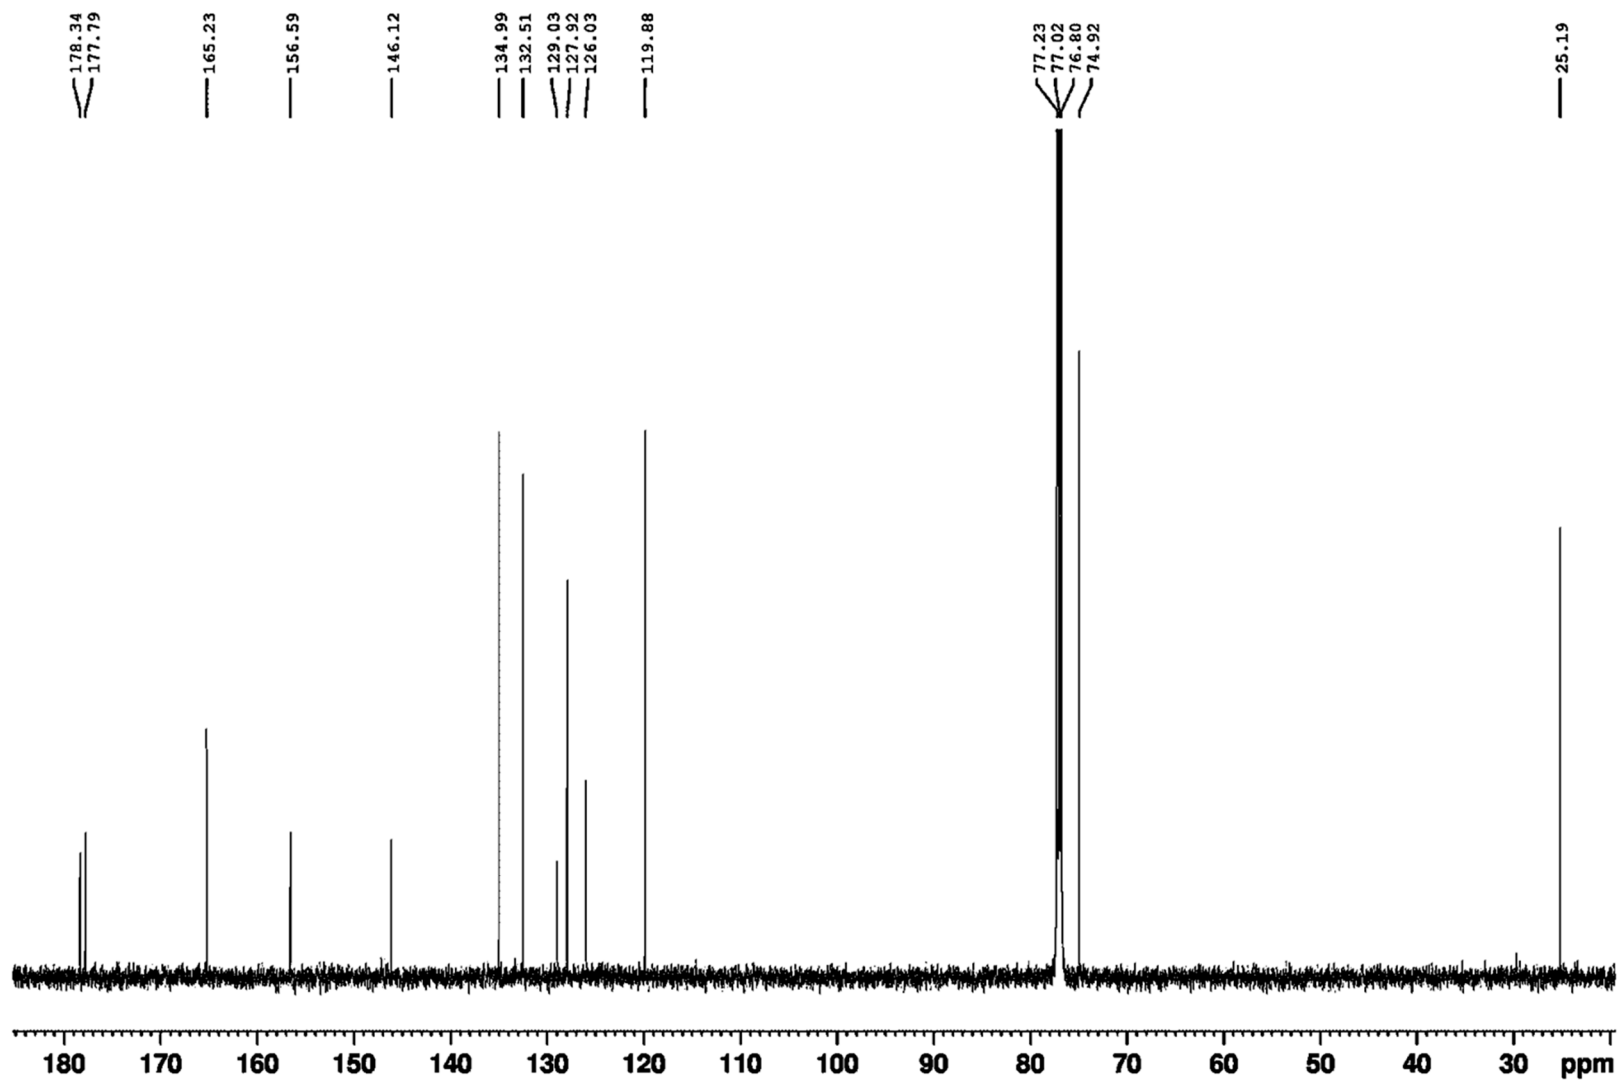

Figure S4 (b):  $^{13}\text{C}$ -NMR spectrum of 6-chloro-2-methyl-7-(2-propenoxy)-5,8-quinolinedione (11).

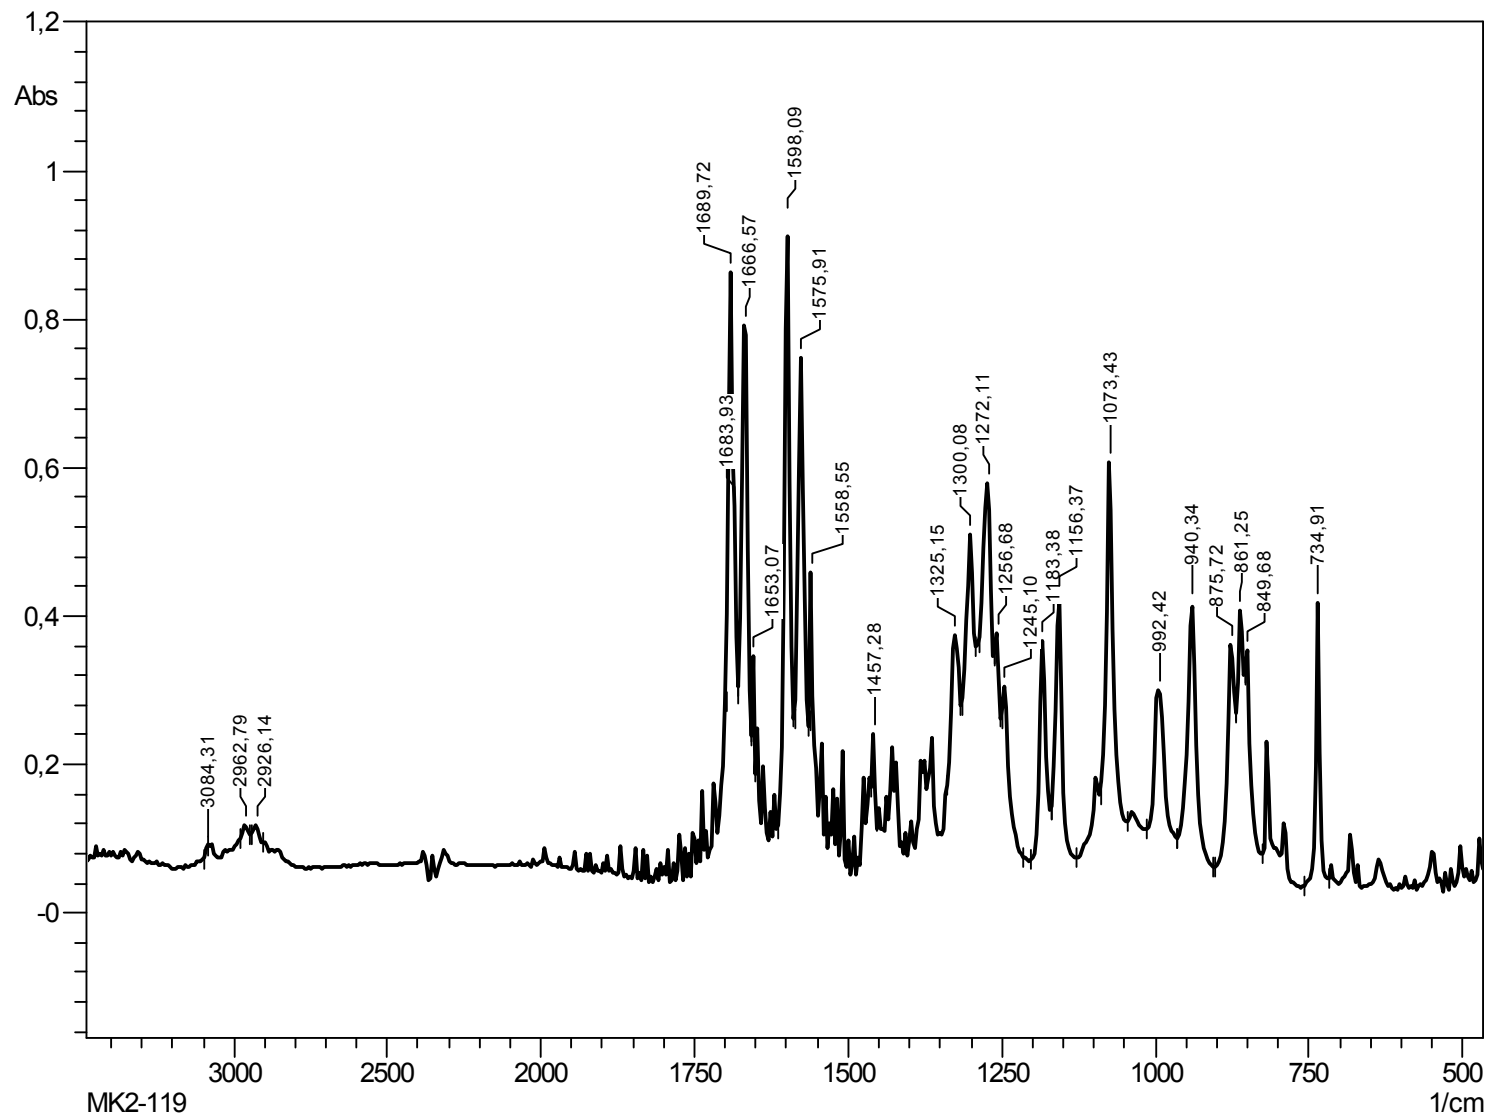

Figure S4 (c): IR spectrum of 6-chloro-2-methyl-7-(2-propenoxy)-5,8-quinolinedione (**11**).

# Compound Spectrum List Report

## Analysis Info

Analysis Name D:\Data\mk11.d  
Method low\_mass.m  
Sample Name TM Low concentration  
Comment

Acquisition Date 2/17/2017 11:31:20 AM  
Operator KM  
Instrument impact II 1825265.10082

## Acquisition Parameter

|             |          |                      |          |                  |           |
|-------------|----------|----------------------|----------|------------------|-----------|
| Source Type | ESI      | Ion Polarity         | Positive | Set Nebulizer    | 0.3 Bar   |
| Focus       | Active   | Set Capillary        | 4000 V   | Set Dry Heater   | 240 °C    |
| Scan Begin  | 100 m/z  | Set End Plate Offset | -500 V   | Set Dry Gas      | 4.0 l/min |
| Scan End    | 1000 m/z | Set Charging Voltage | 2000 V   | Set Divert Valve | Source    |
|             |          | Set Corona           | 0 nA     | Set APCI Heater  | 0 °C      |

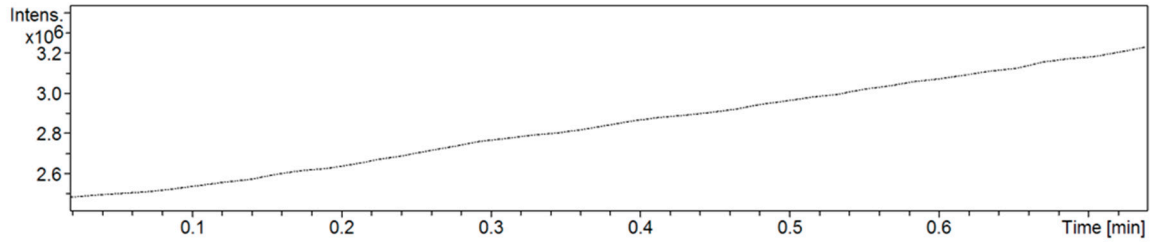

## +MS, 0.0-0.7min #1-43

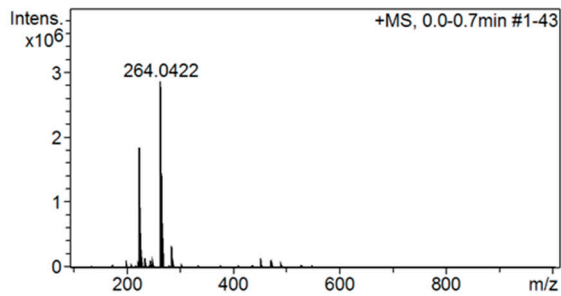

| # | m/z      | Res.  | S/N     | I       | I%    | FWHM   |
|---|----------|-------|---------|---------|-------|--------|
| 1 | 225.0186 | 32453 | 42983.7 | 1844651 | 64.6  | 0.0069 |
| 2 | 264.0422 | 35688 | 49878.3 | 2857194 | 100.0 | 0.0074 |

**Figure S4 (d):** HR-MS spectrum of 6-chloro-2-methyl-7-(2-propenoxy)-5,8-quinolinedione (**11**).

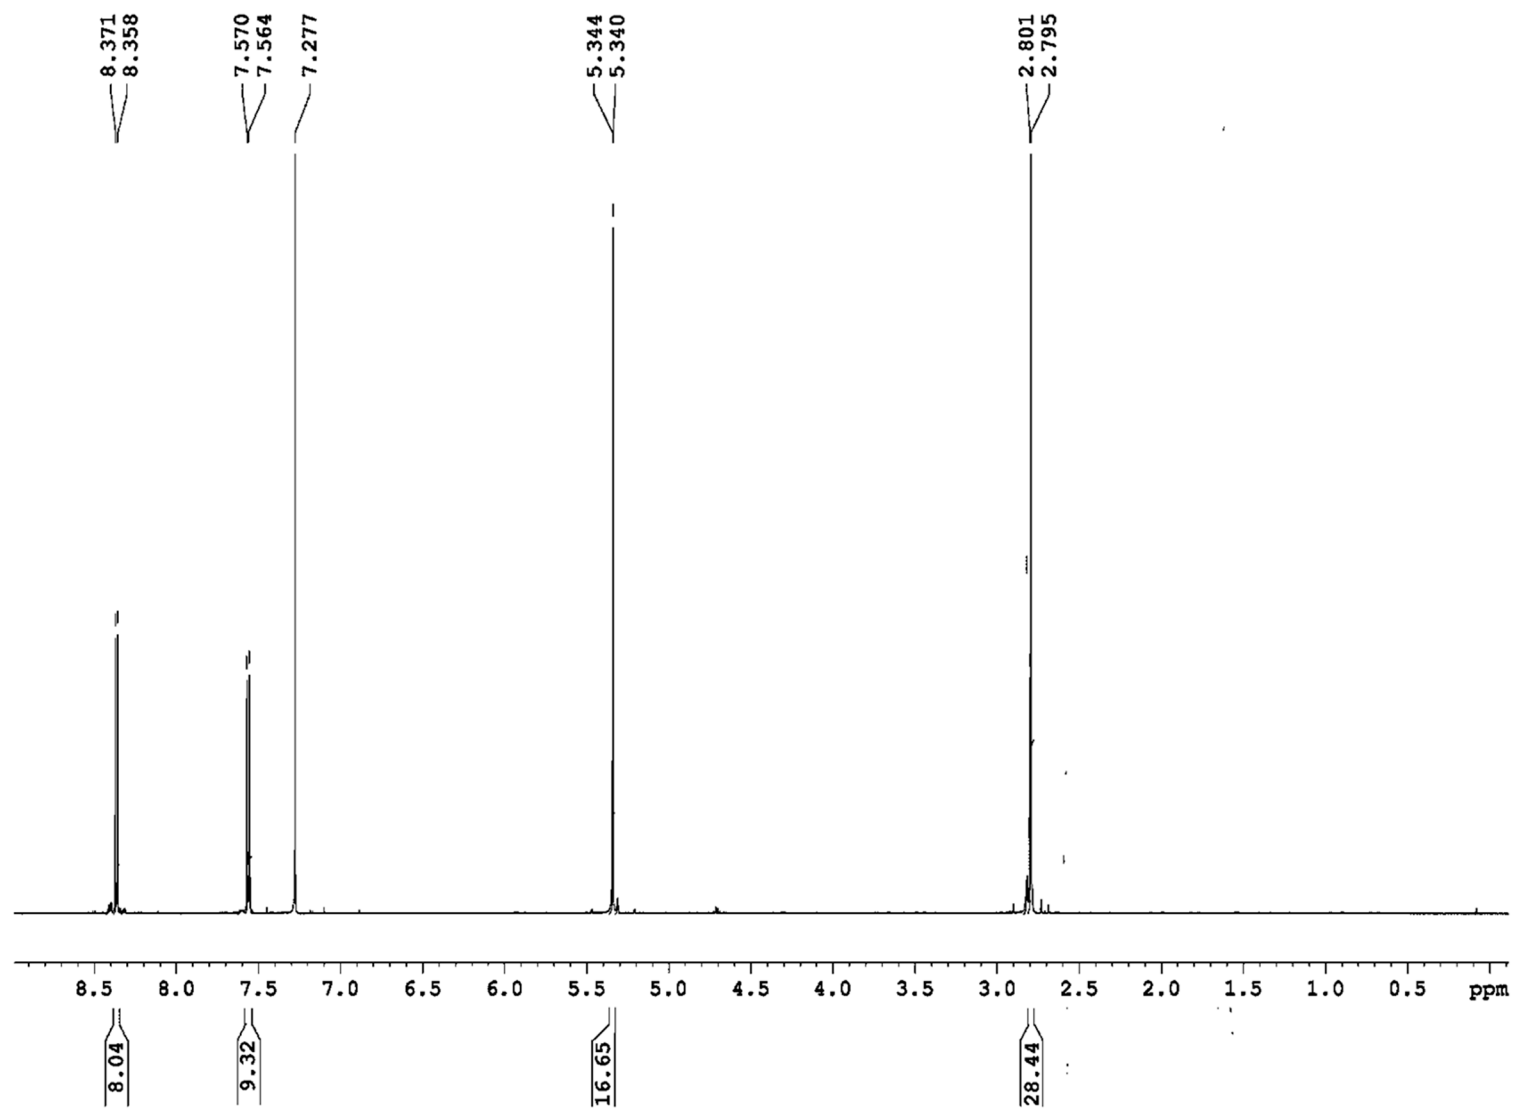

Figure S5 (a): <sup>1</sup>H-NMR spectrum of 6-chloro-2-methyl-7-(2-propynoxy)-5,8-quinolinedione (12).

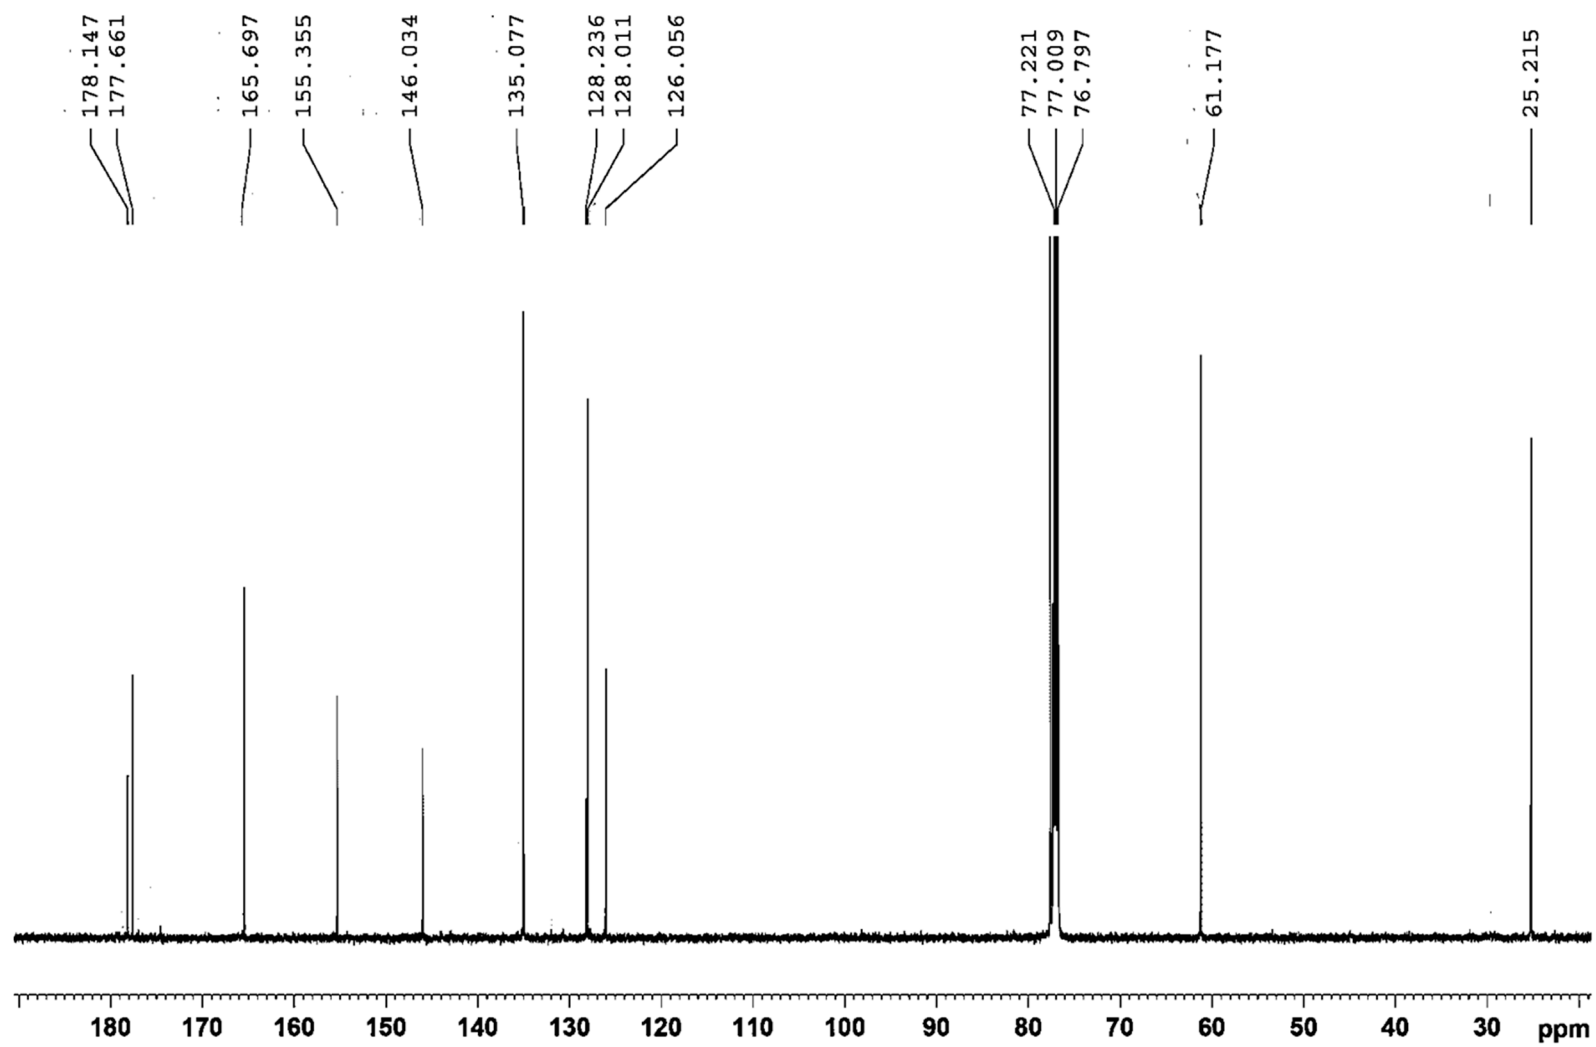

Figure S5 (b): <sup>13</sup>C-NMR spectrum of 6-chloro-2-methyl-7-(2-propyenoxy)-5,8-quinolinedione (12).

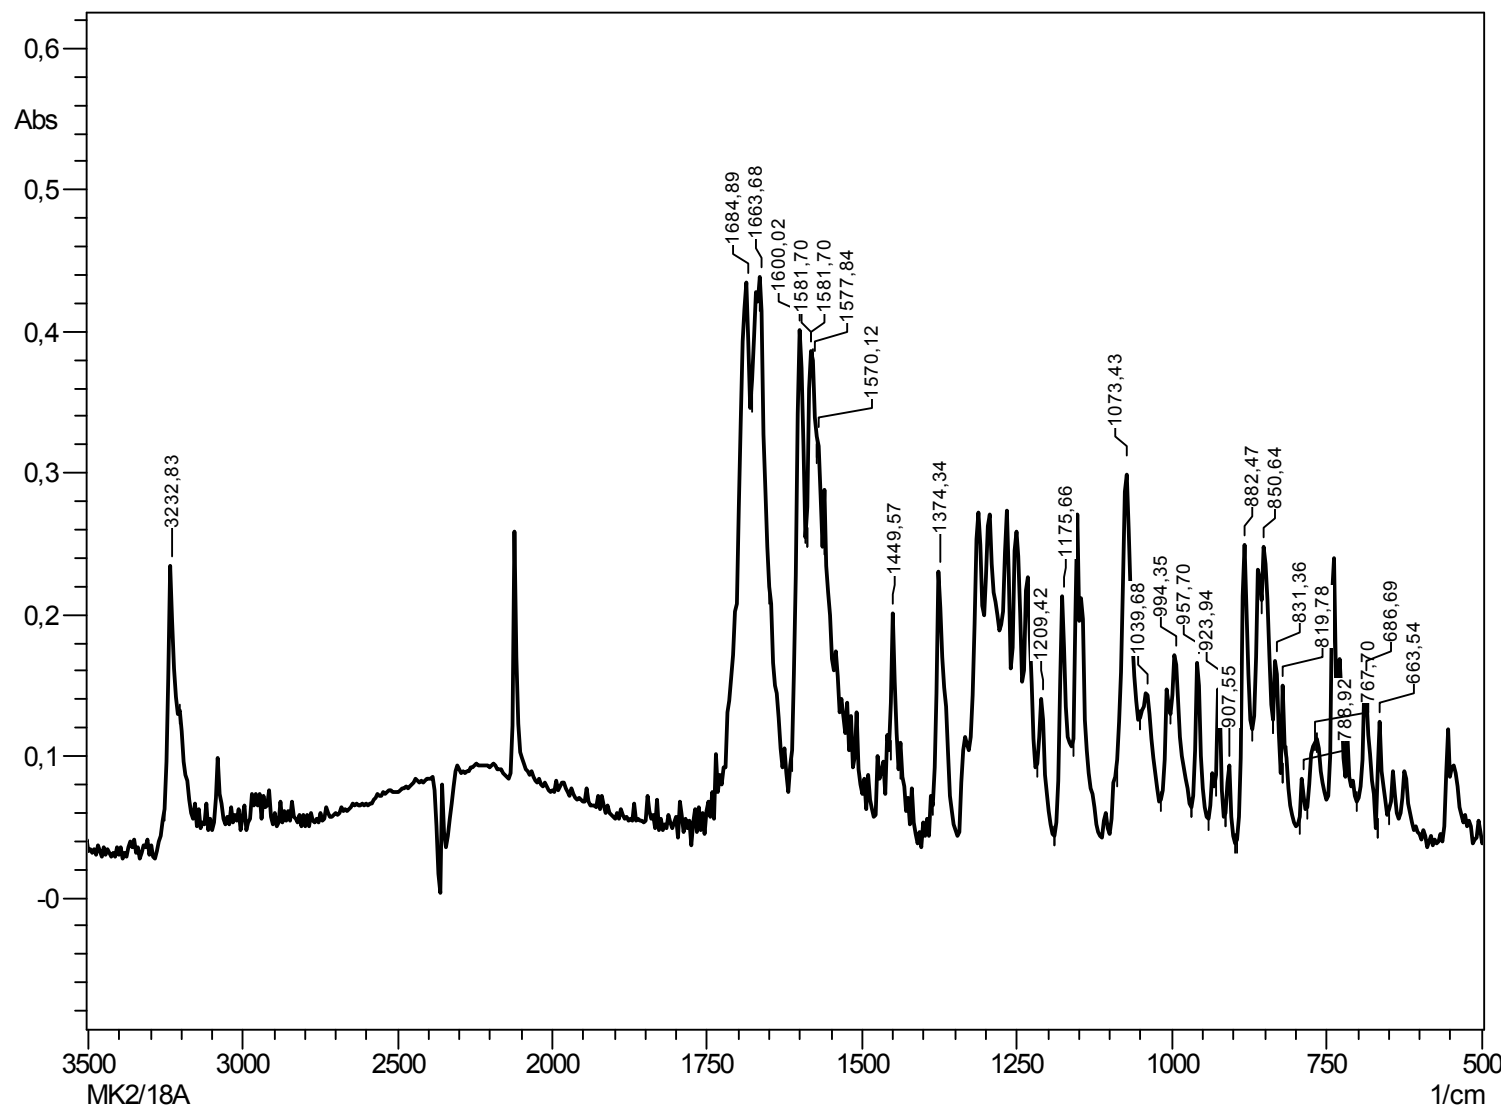

Figure S5 (c): IR spectrum of 6-chloro-2-methyl-7-(2-propoxy)-5,8-quinolinedione (12).

# Compound Spectrum List Report

## Analysis Info

Analysis Name D:\Data\mk12.d  
Method low\_mass.m  
Sample Name TM Low concentration  
Comment

Acquisition Date 2/17/2017 11:33:58 AM  
Operator KM  
Instrument impact II 1825265.10082

## Acquisition Parameter

|             |          |                      |          |                  |           |
|-------------|----------|----------------------|----------|------------------|-----------|
| Source Type | ESI      | Ion Polarity         | Positive | Set Nebulizer    | 0.3 Bar   |
| Focus       | Active   | Set Capillary        | 4000 V   | Set Dry Heater   | 240 °C    |
| Scan Begin  | 100 m/z  | Set End Plate Offset | -500 V   | Set Dry Gas      | 4.0 l/min |
| Scan End    | 1000 m/z | Set Charging Voltage | 2000 V   | Set Divert Valve | Source    |
|             |          | Set Corona           | 0 nA     | Set APCI Heater  | 0 °C      |

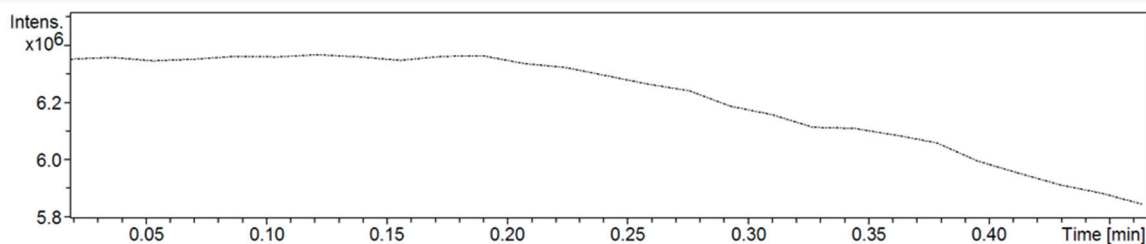

## +MS, 0.0-0.5min #1-27

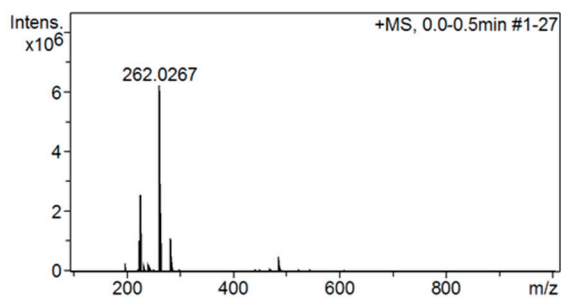

| # | m/z      | Res.  | S/N     | I       | I%    | FWHM   |
|---|----------|-------|---------|---------|-------|--------|
| 1 | 227.0576 | 33332 | 41660.4 | 2579390 | 41.5  | 0.0068 |
| 2 | 262.0267 | 37503 | 86017.8 | 6213385 | 100.0 | 0.0070 |

Figure S5 (d): HR-MS spectrum of 6-chloro-2-methyl-7-(2-propynoxy)-5,8-quinolinedione (12).

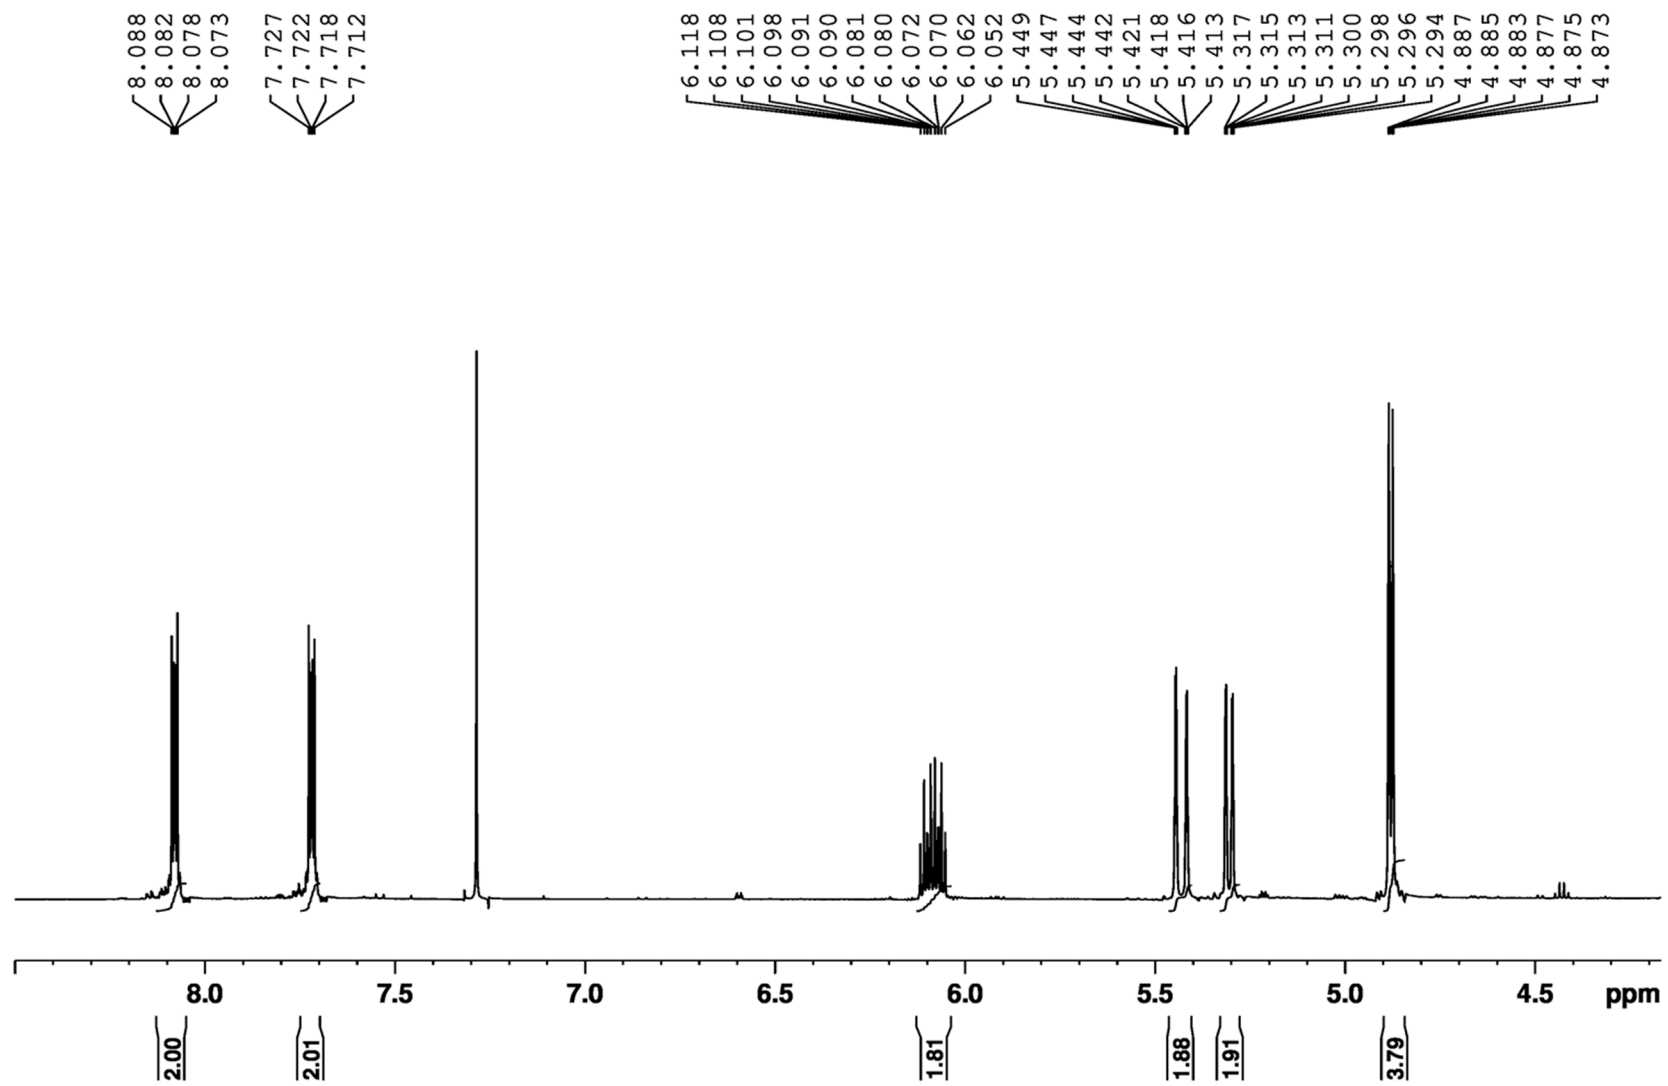

Figure S6 (a):  $^{13}\text{C}$ -NMR spectrum of 2,3-di(2-propenoxy)-1,4-naphthoquinon (14).



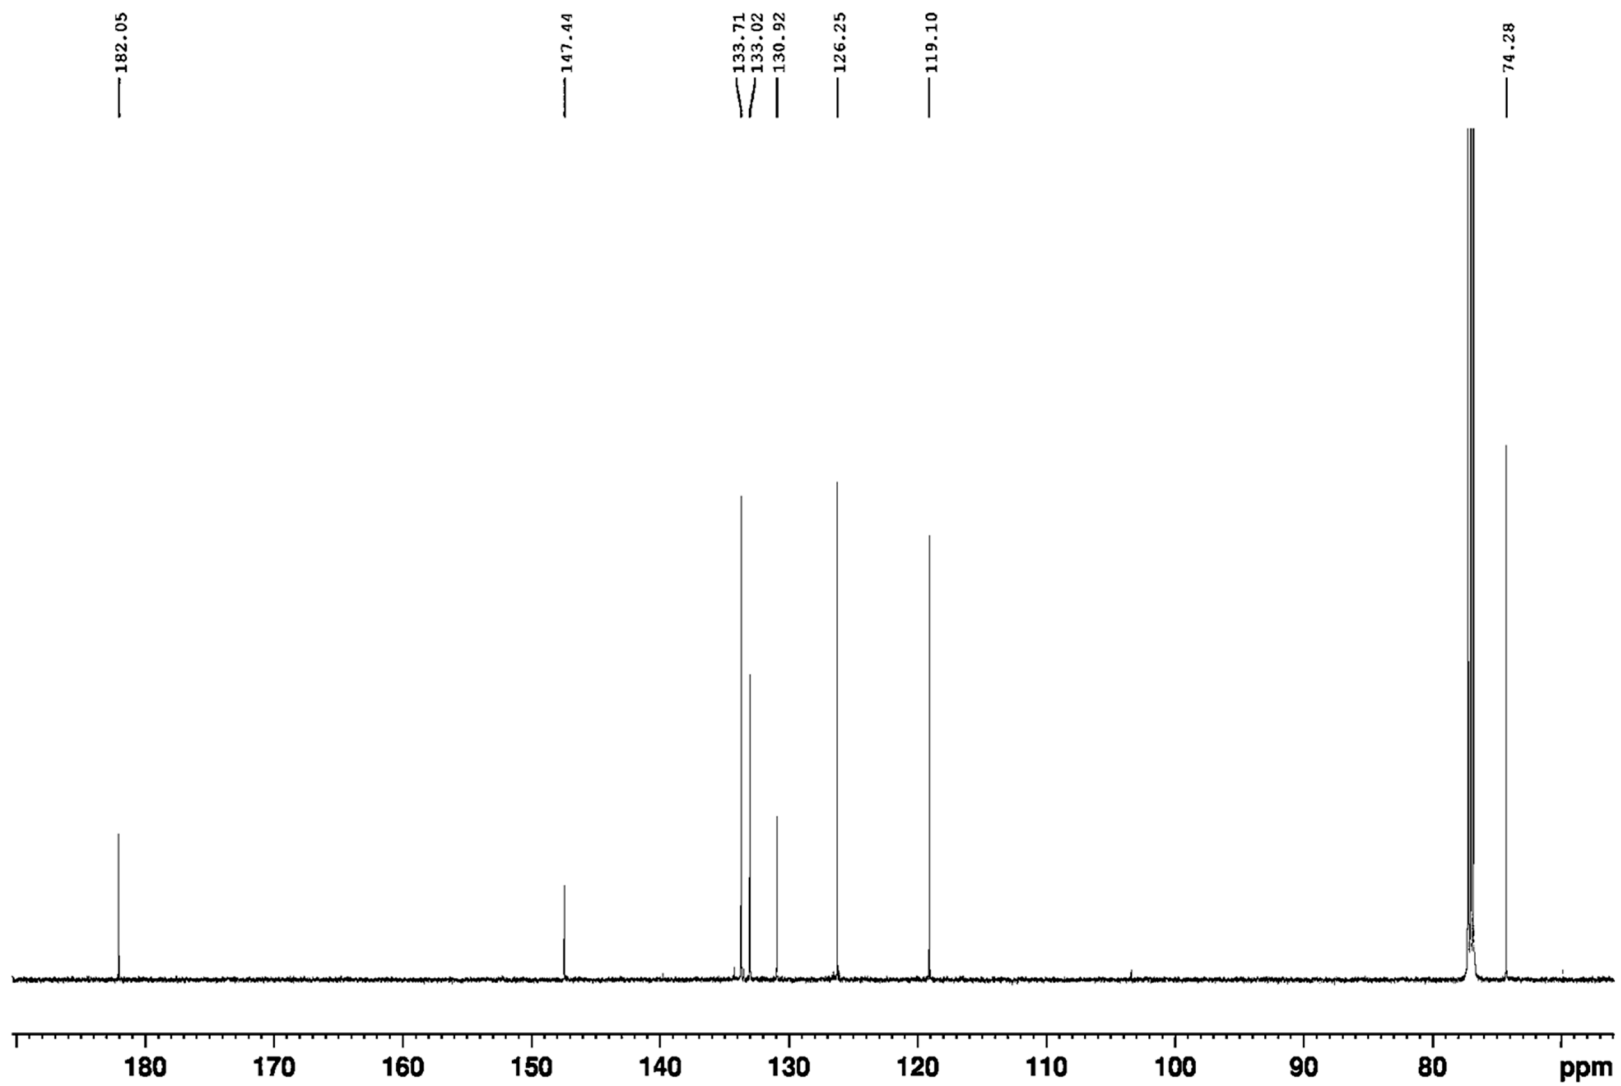

Figure S6 (b): <sup>1</sup>H-NMR spectrum of 2,3-di(2-propenoxy)-1,4-naphthoquinon (**14**).

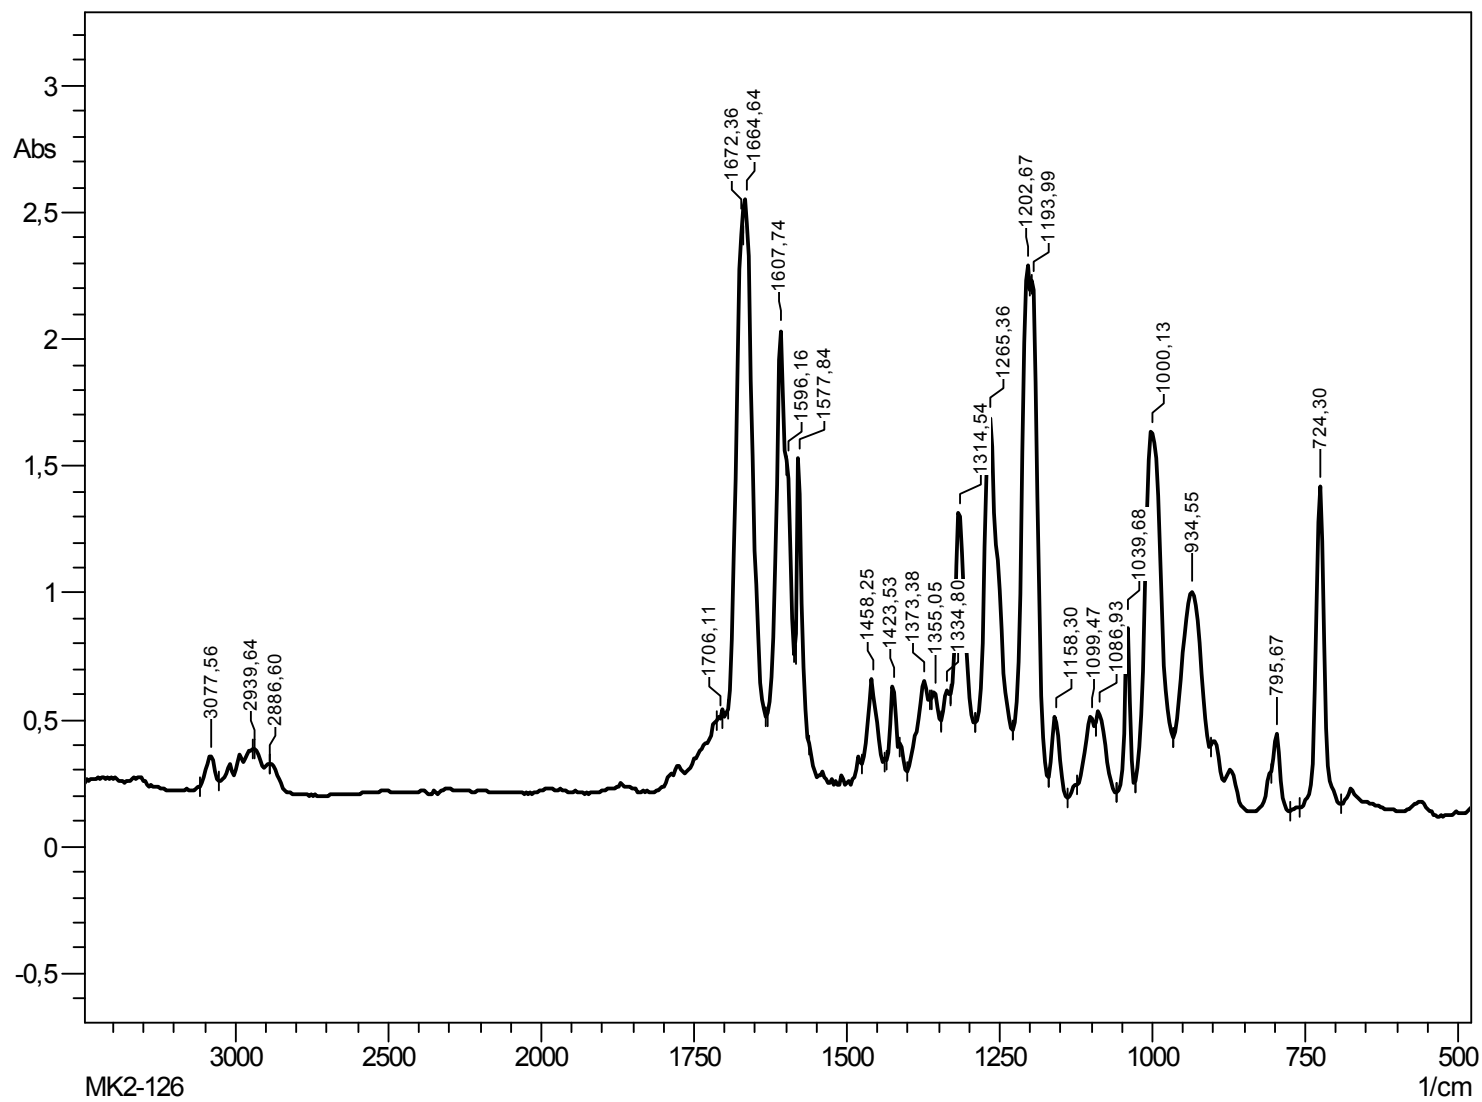

Figure S6 (c): IR spectrum of 2,3-di(2-propenoxy)-1,4-naphthoquinon (**14**).

# Compound Spectrum List Report

## Analysis Info

Analysis Name D:\Data\mk14b.d  
Method low\_mass.m  
Sample Name TM Low concentration  
Comment

Acquisition Date 2/17/2017 12:11:12 PM  
Operator KM  
Instrument impact II 1825265.10082

## Acquisition Parameter

|             |          |                      |          |                  |           |
|-------------|----------|----------------------|----------|------------------|-----------|
| Source Type | ESI      | Ion Polarity         | Positive | Set Nebulizer    | 0.3 Bar   |
| Focus       | Active   | Set Capillary        | 4000 V   | Set Dry Heater   | 240 °C    |
| Scan Begin  | 100 m/z  | Set End Plate Offset | -500 V   | Set Dry Gas      | 4.0 l/min |
| Scan End    | 1000 m/z | Set Charging Voltage | 2000 V   | Set Divert Valve | Source    |
|             |          | Set Corona           | 0 nA     | Set APCI Heater  | 0 °C      |

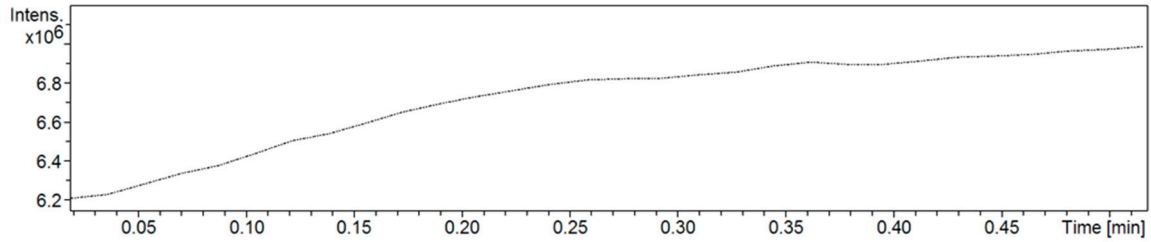

## +MS, 0.0-0.5min #1-30

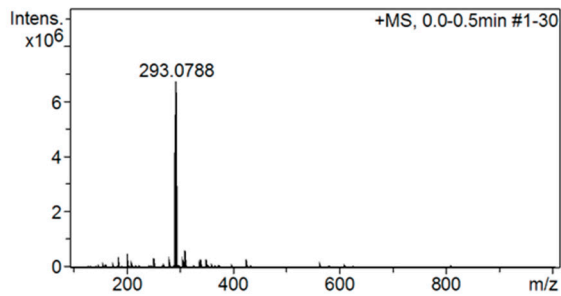

| # | m/z      | Res.  | S/N     | I       | I%    | FWHM   |
|---|----------|-------|---------|---------|-------|--------|
| 1 | 293.0788 | 39470 | 44707.4 | 6722752 | 100.0 | 0.0074 |

Figure S6 (d): HR-MS spectrum of 2,3-di(2-propenoxy)-1,4-naphtoquinon (14).

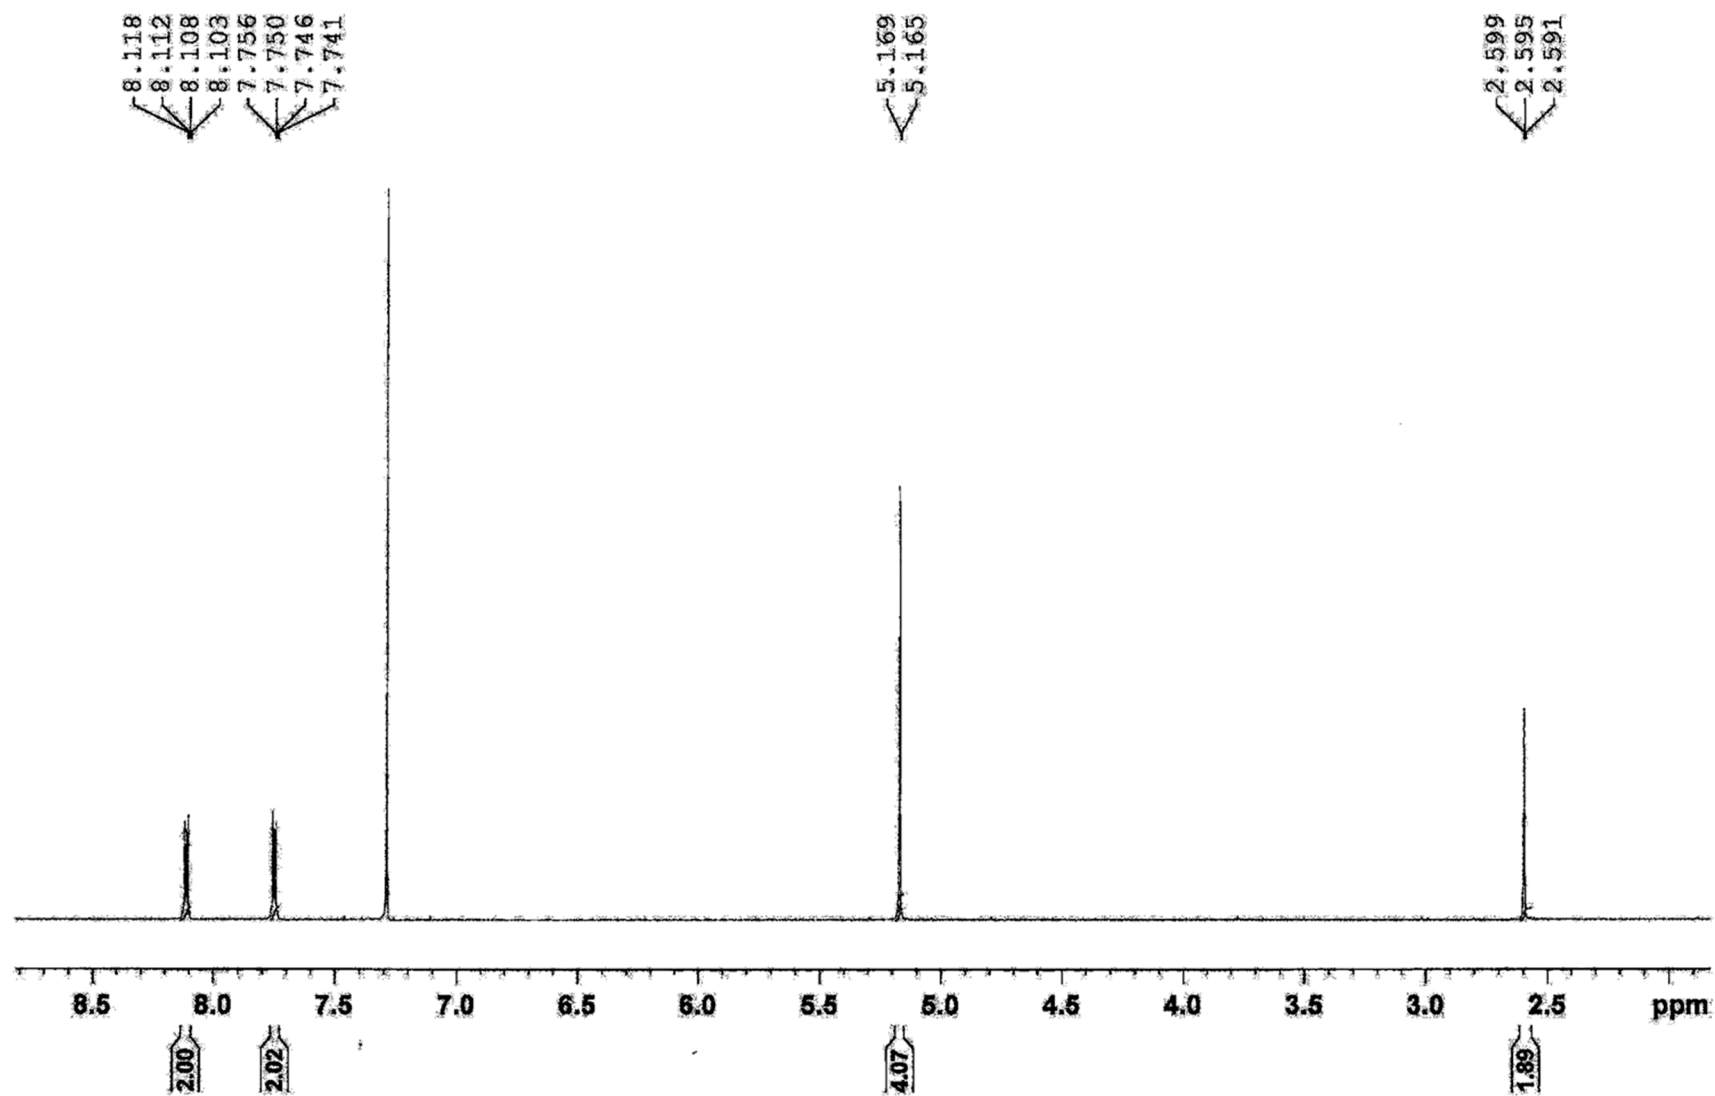

Figure S7 (a): <sup>1</sup>H-NMR spectrum of 2,3-di(2-propynyloxy)-1,4-naphthoquinon (15).

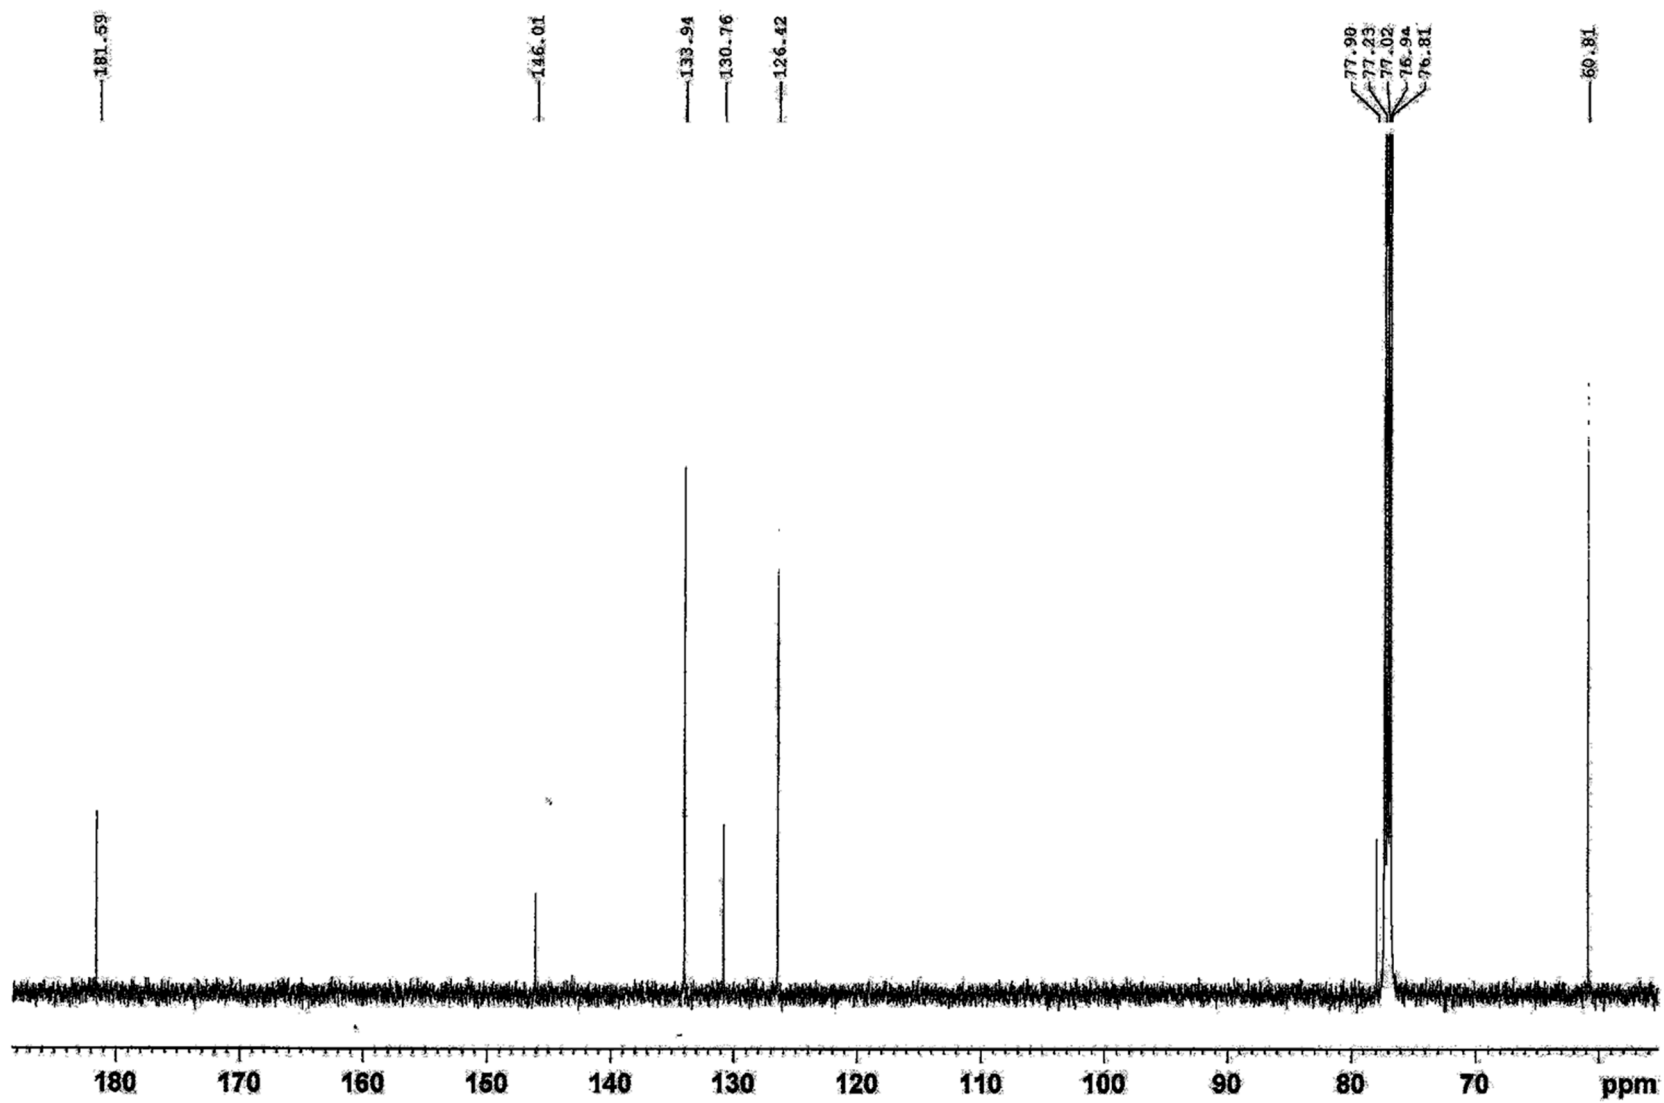

Figure S7 (b):  $^{13}\text{C}$ -NMR spectrum of 2,3-di(2-propyenoxy)-1,4-naphthoquinon (15).

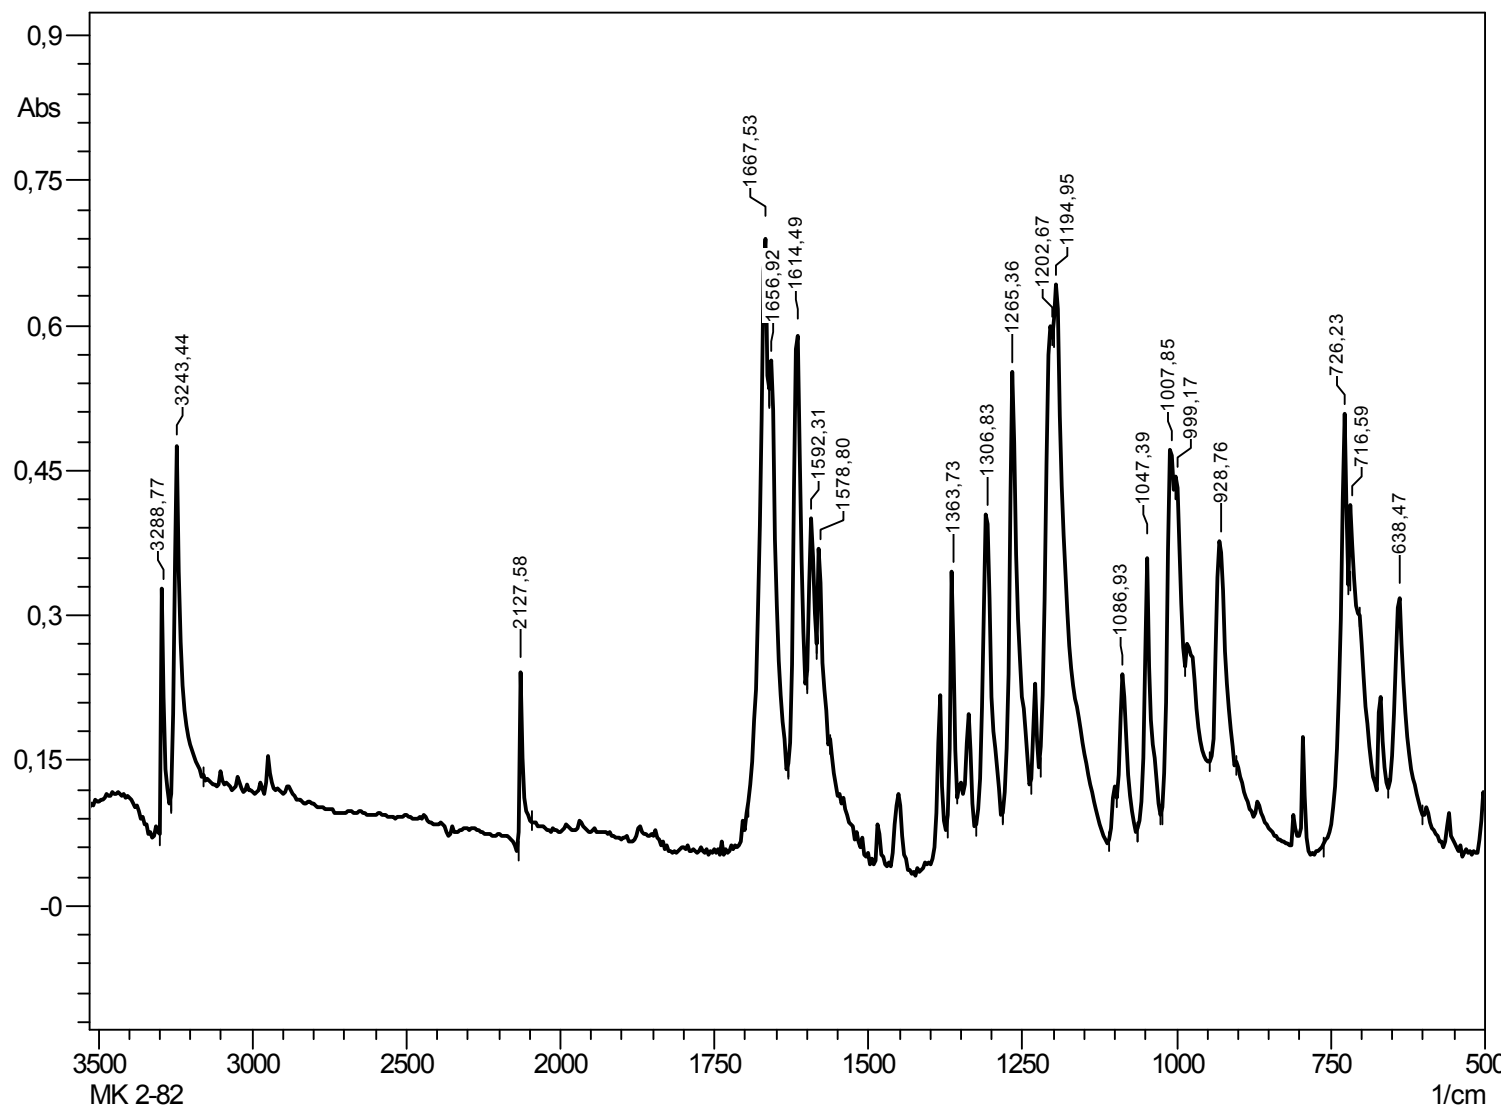

Figure S7 (c): IR spectrum of 2,3-di(2-propynyloxy)-1,4-naphthoquinone (15).

# Compound Spectrum List Report

## Analysis Info

Analysis Name D:\Data\mk15b.d  
Method low\_mass.m  
Sample Name TM Low concentration  
Comment

Acquisition Date 2/17/2017 12:18:02 PM  
Operator KM  
Instrument impact II 1825265.10082

## Acquisition Parameter

|             |          |                      |          |                  |           |
|-------------|----------|----------------------|----------|------------------|-----------|
| Source Type | ESI      | Ion Polarity         | Positive | Set Nebulizer    | 0.3 Bar   |
| Focus       | Active   | Set Capillary        | 4000 V   | Set Dry Heater   | 240 °C    |
| Scan Begin  | 100 m/z  | Set End Plate Offset | -500 V   | Set Dry Gas      | 4.0 l/min |
| Scan End    | 1000 m/z | Set Charging Voltage | 2000 V   | Set Divert Valve | Source    |
|             |          | Set Corona           | 0 nA     | Set APCI Heater  | 0 °C      |

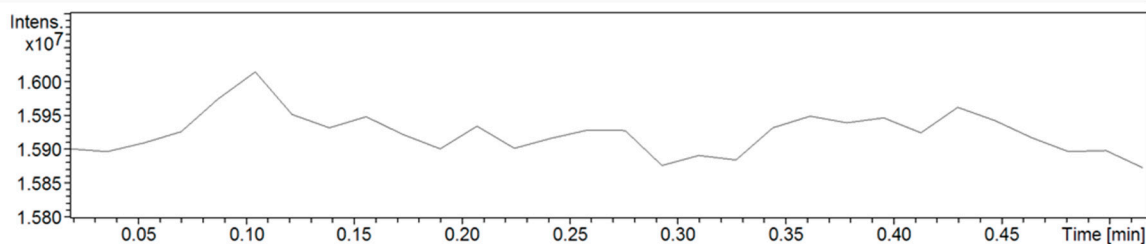

## +MS, 0.0-0.5min #1-30

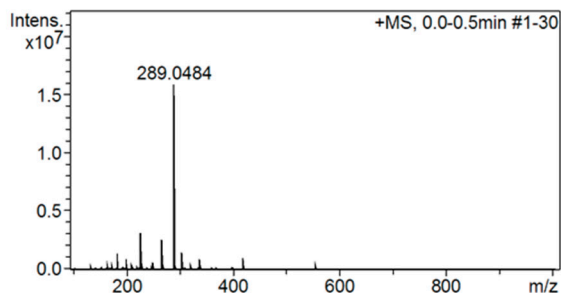

| # | m/z      | Res.  | S/N     | I        | I%    | FWHM   |
|---|----------|-------|---------|----------|-------|--------|
| 1 | 289.0484 | 38736 | 59031.0 | 15912883 | 100.0 | 0.0075 |

**Figure S7 (d):** HR-MS spectrum of 2,3-di(2-propynoxy)-1,4-naphthoquinon (15).

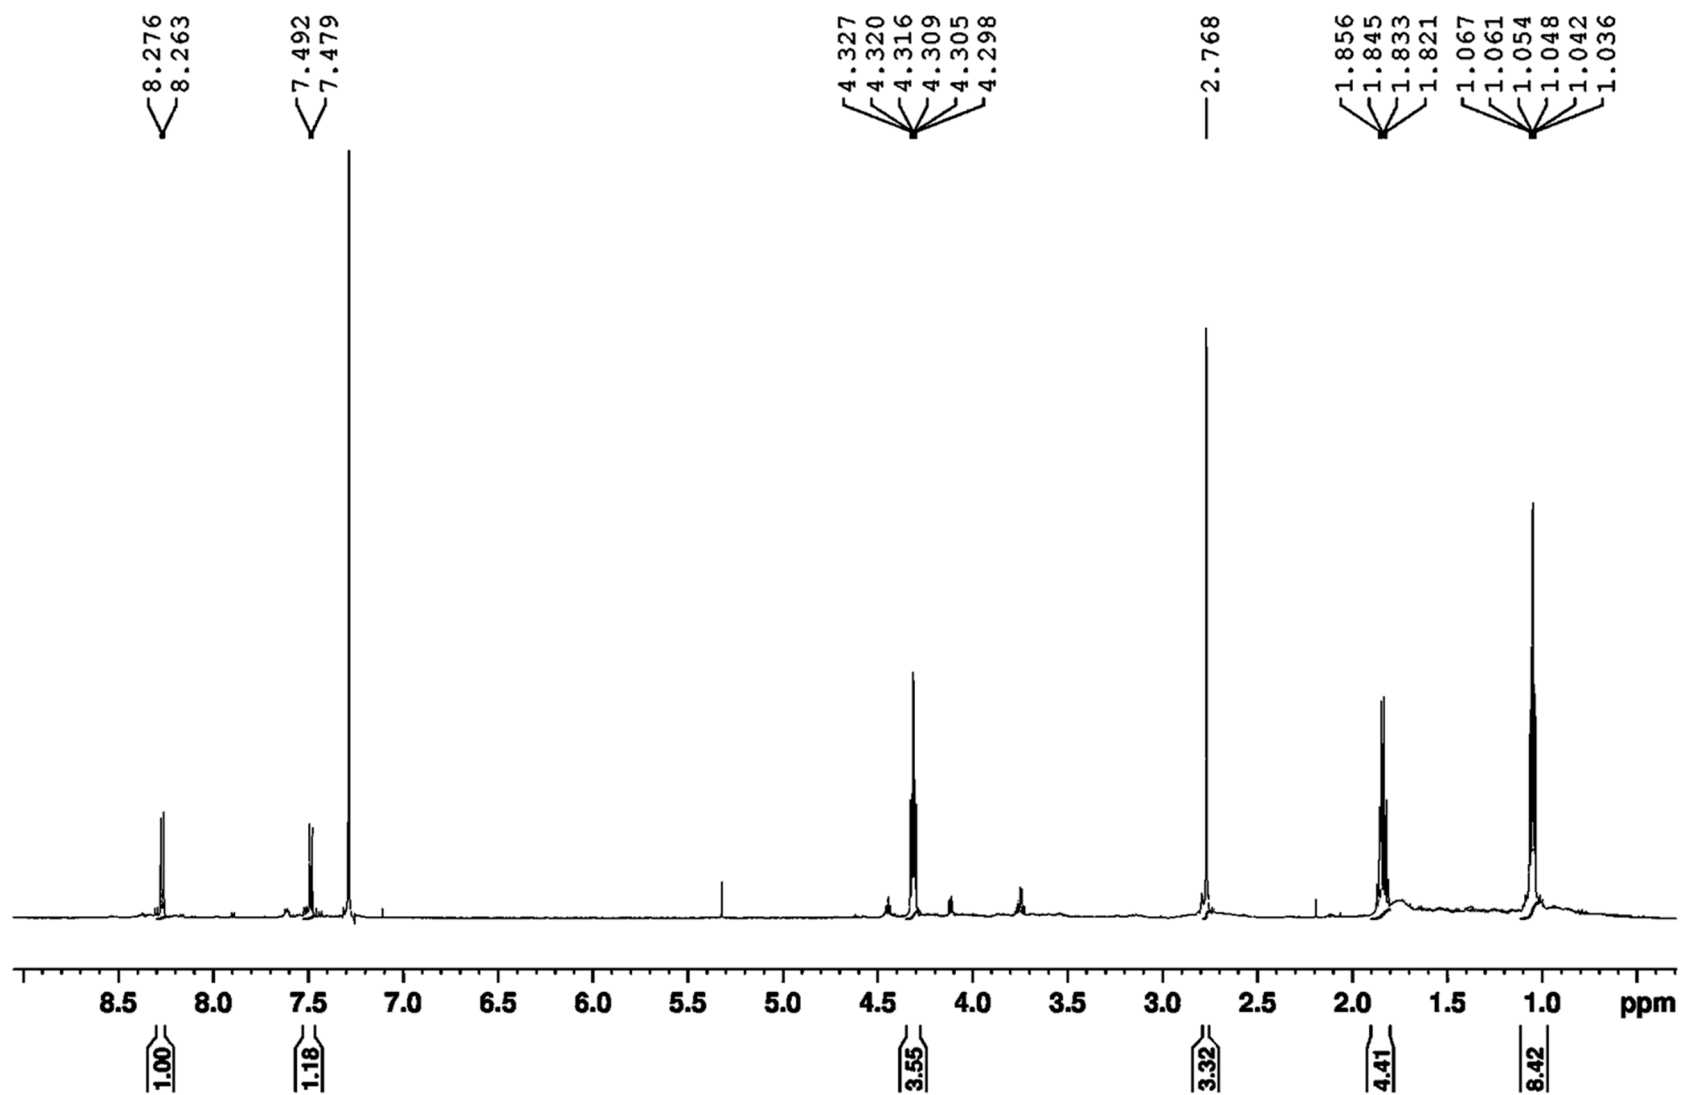

Figure S8 (a):  $^1\text{H}$ -NMR spectrum of 2-methyl-6,7-dipropoxy-5,8-quinolinedione (19).



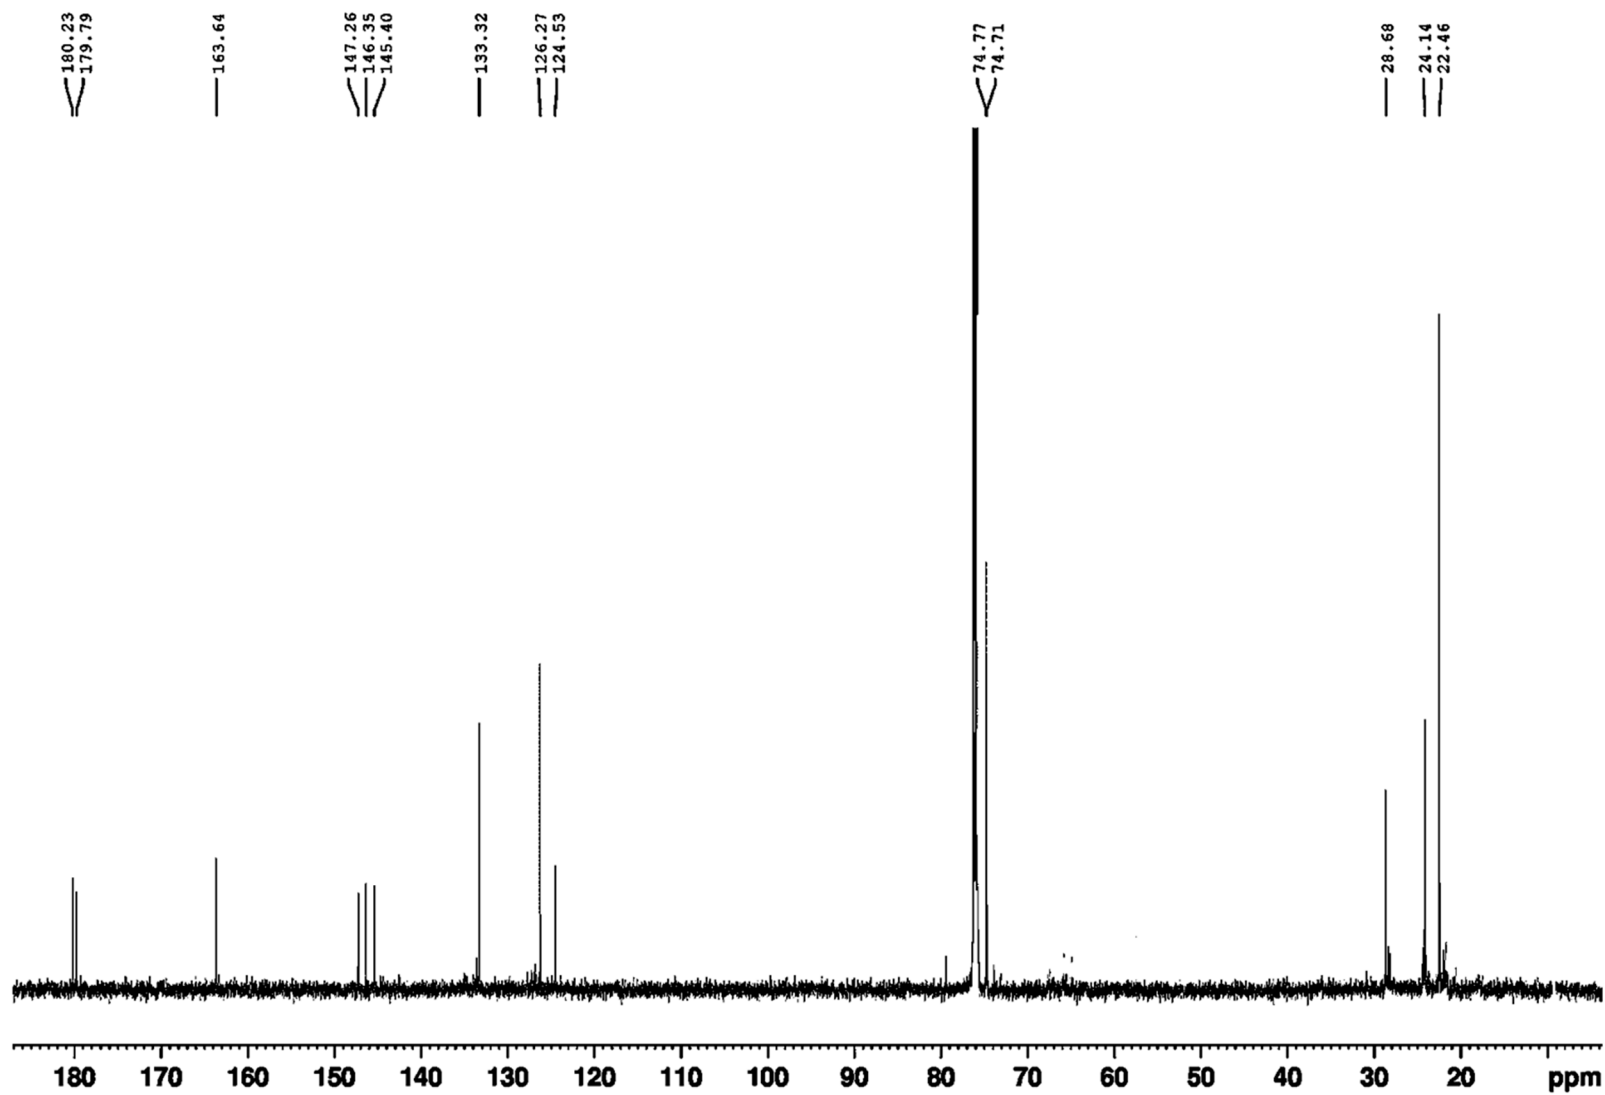

Figure S8 (b):  $^{13}\text{C}$ -NMR spectrum of 2-methyl-6,7-dipropoxy-5,8-quinolinedione (19).

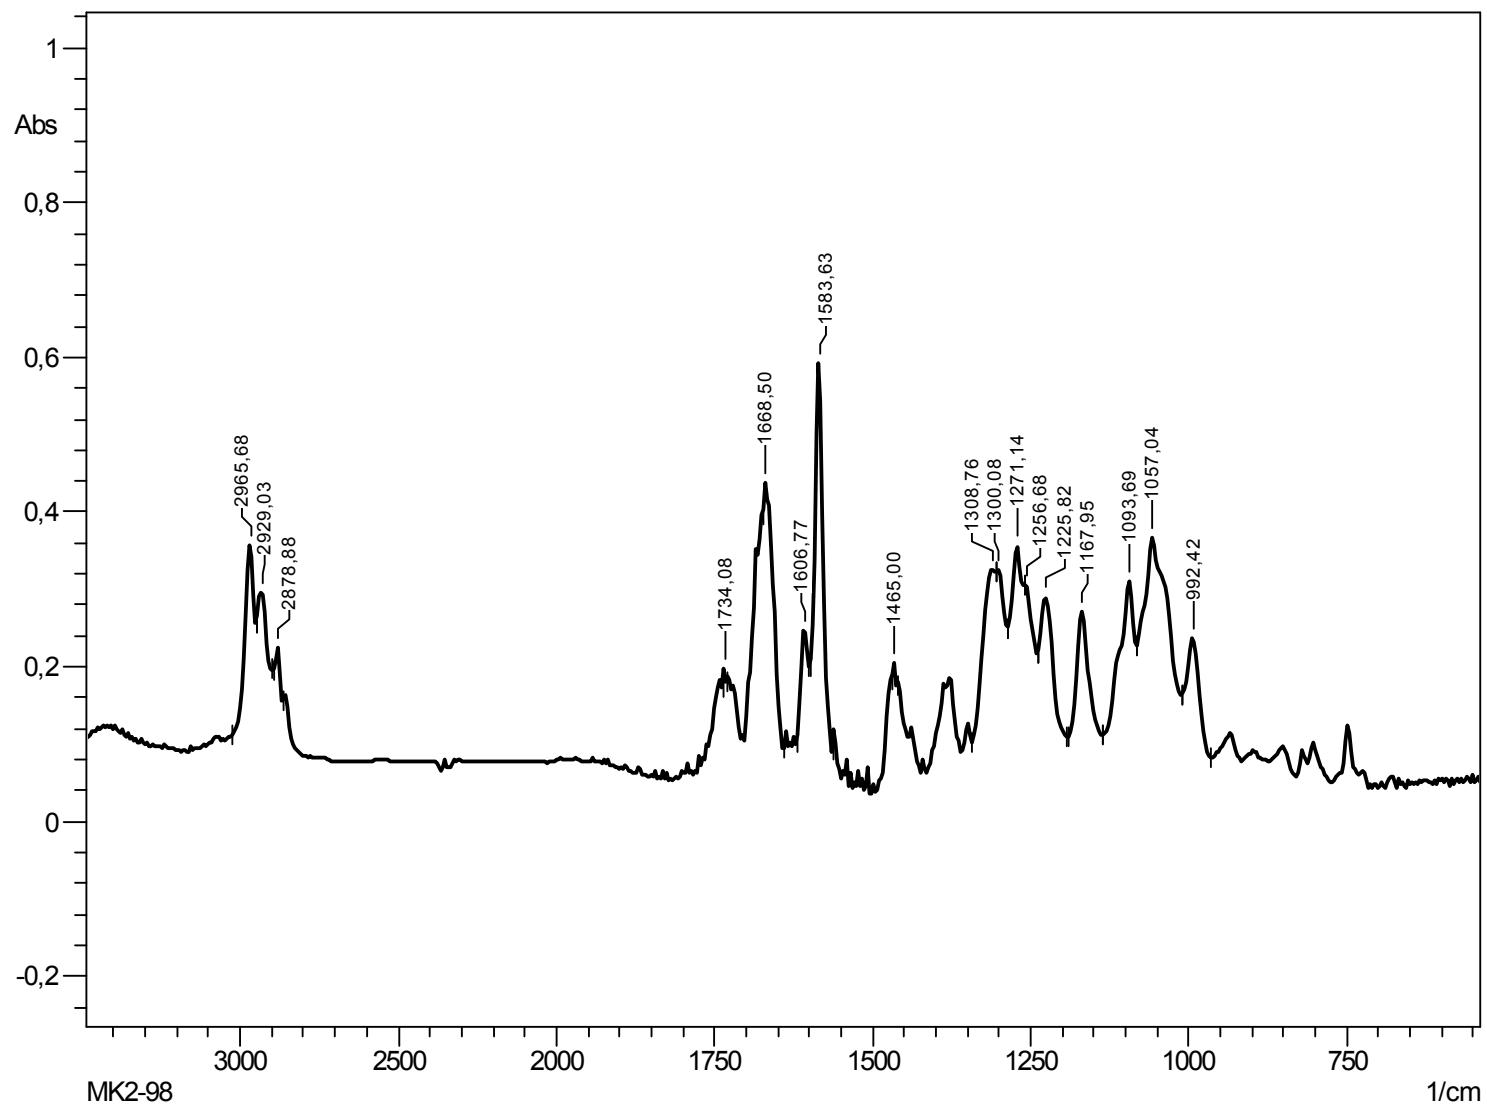

Figure S8 (c): IR spectrum of 2-methyl-6,7-dipropoxy-5,8-quinolinedione (19).

# Compound Spectrum List Report

## Analysis Info

Analysis Name D:\Data\mk19.d  
Method low\_mass.m  
Sample Name TM Low concentration  
Comment

Acquisition Date 2/17/2017 11:46:11 AM  
Operator KM  
Instrument impact II 1825265.10082

## Acquisition Parameter

|             |          |                      |          |                  |           |
|-------------|----------|----------------------|----------|------------------|-----------|
| Source Type | ESI      | Ion Polarity         | Positive | Set Nebulizer    | 0.3 Bar   |
| Focus       | Active   | Set Capillary        | 4000 V   | Set Dry Heater   | 240 °C    |
| Scan Begin  | 100 m/z  | Set End Plate Offset | -500 V   | Set Dry Gas      | 4.0 l/min |
| Scan End    | 1000 m/z | Set Charging Voltage | 2000 V   | Set Divert Valve | Source    |
|             |          | Set Corona           | 0 nA     | Set APCI Heater  | 0 °C      |

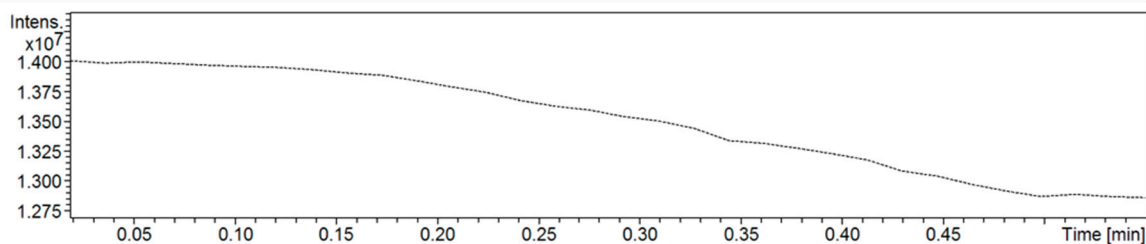

## +MS, 0.0-0.5min #1-32

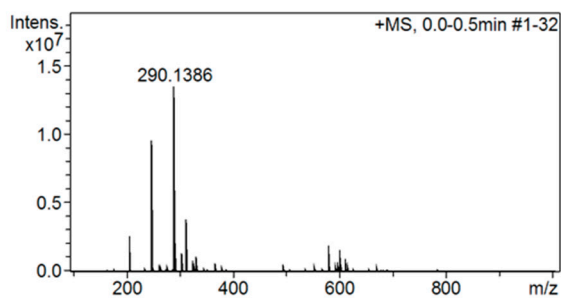

| # | m/z      | Res.  | S/N     | I        | I%    | FWHM   |
|---|----------|-------|---------|----------|-------|--------|
| 1 | 206.0444 | 33147 | 27518.0 | 2659770  | 19.7  | 0.0062 |
| 2 | 248.0915 | 36233 | 75963.1 | 9535350  | 70.5  | 0.0068 |
| 3 | 290.1386 | 38892 | 73922.7 | 13516469 | 100.0 | 0.0075 |

**Figure S8 (d):** HR-MS spectrum of 2-methyl-6,7-dipropoxy-5,8-quinolinedione (**19**).

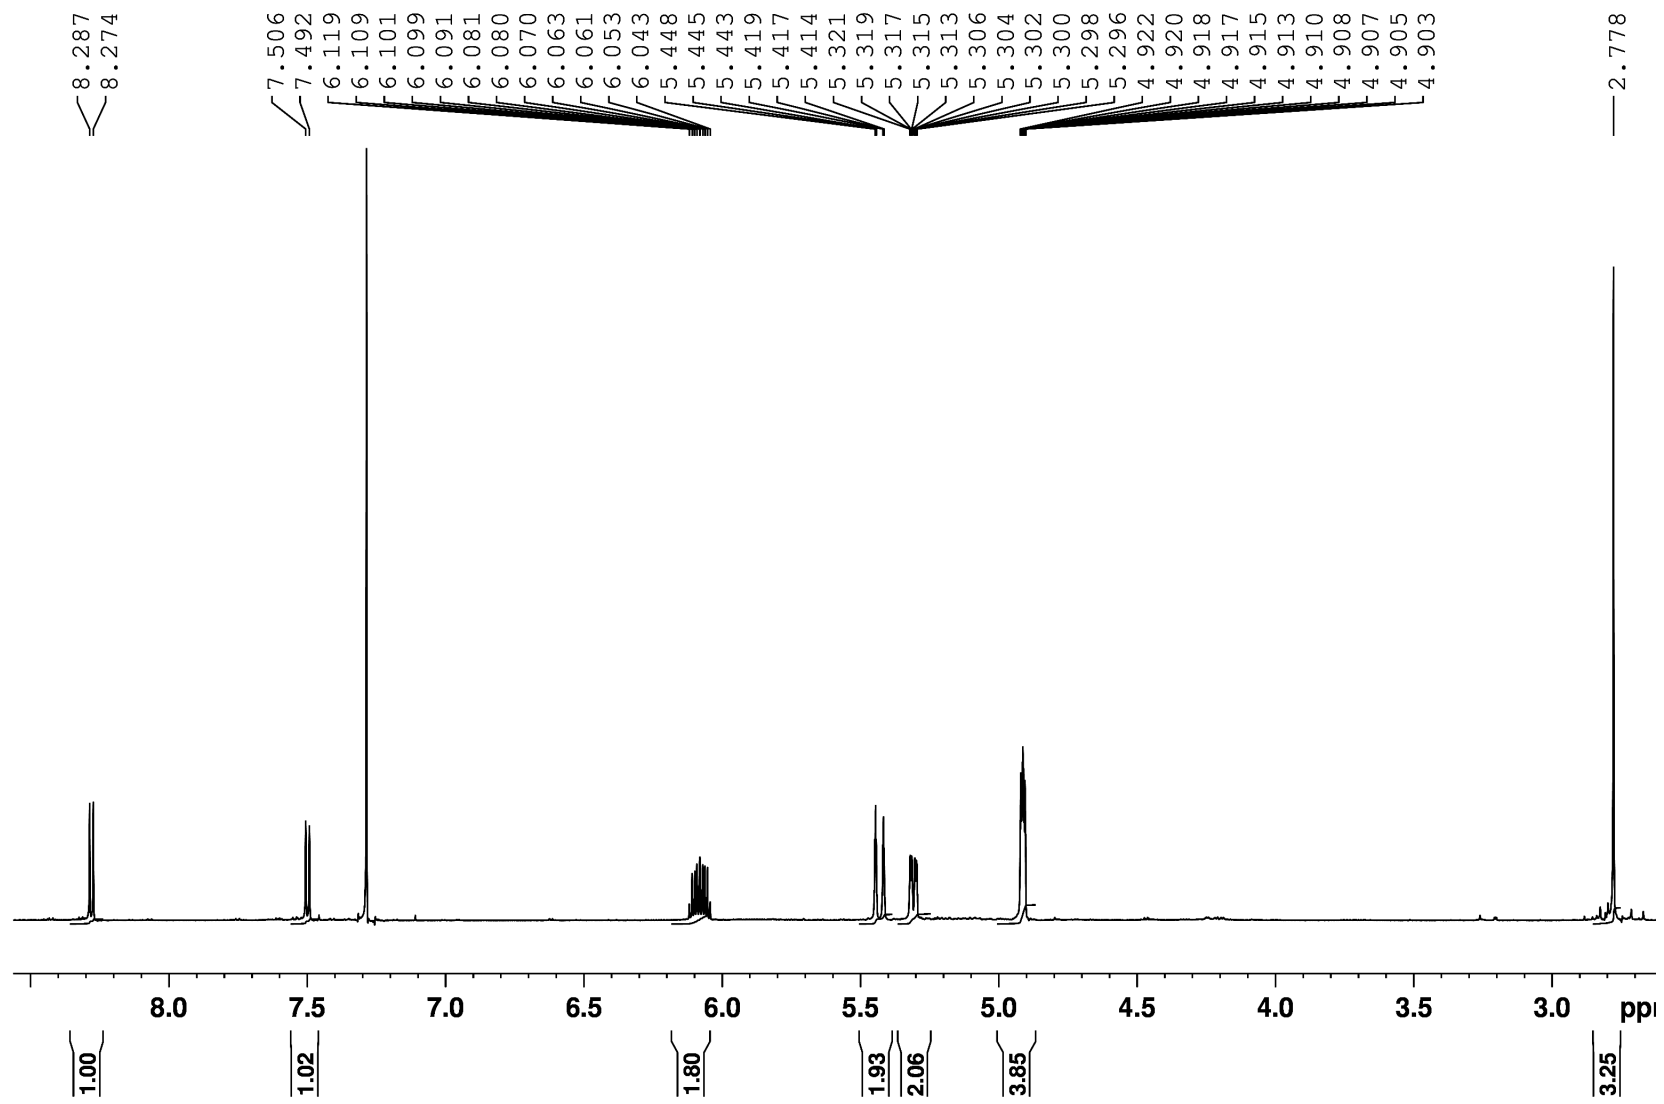

Figure S9 (a):  $^1\text{H}$ -NMR spectrum of 2-methyl-6,7-di(2-propenoxy)-5,8-quinolinedione (20).

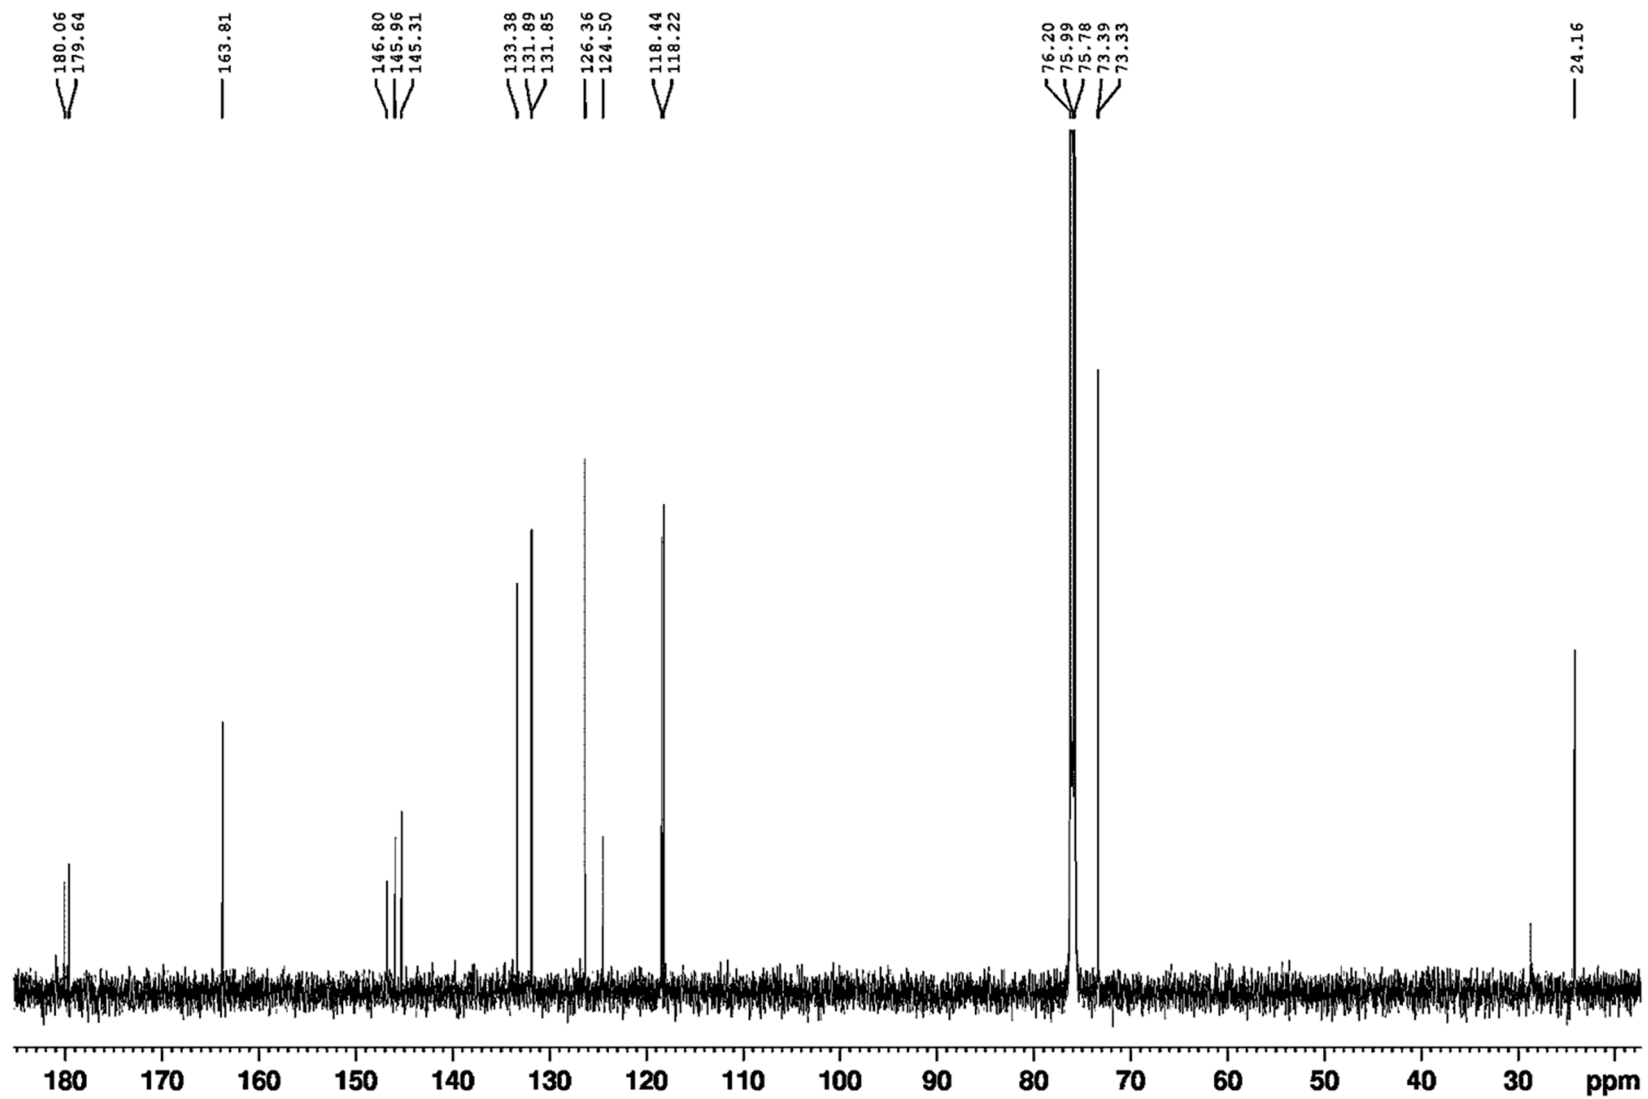

Figure S9 (b):  $^{13}\text{C}$ -NMR spectrum of 2-methyl-6,7-di(2-propenoxy)-5,8-quinolinedione (20).

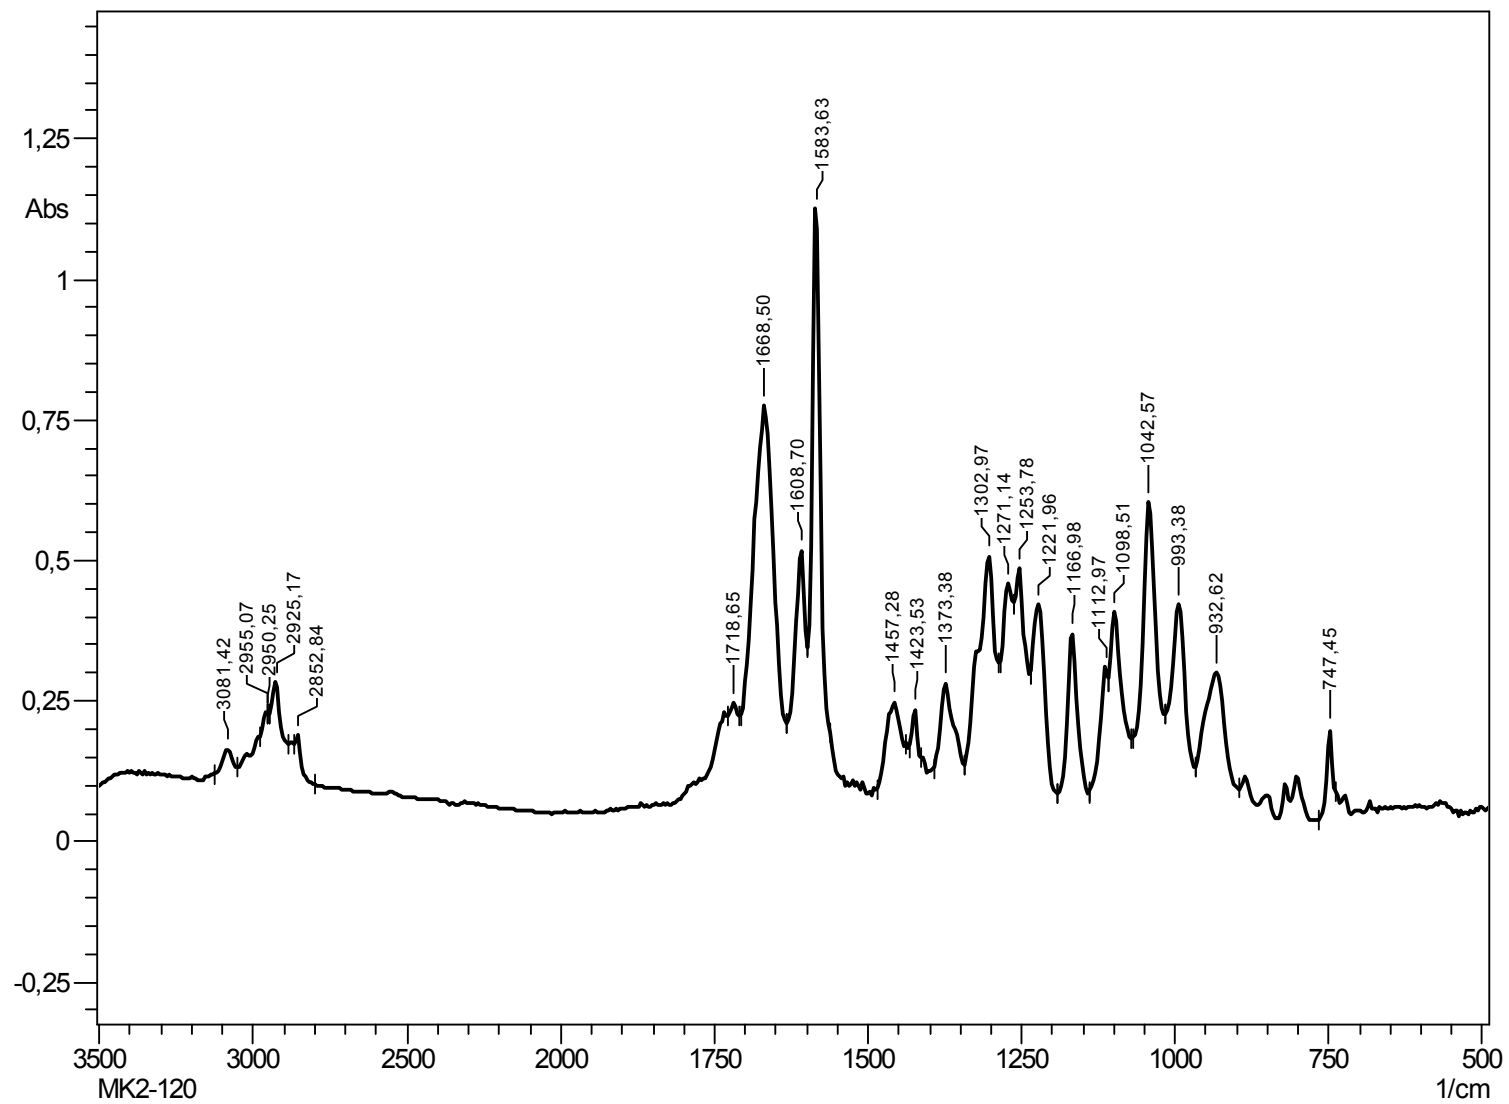

Figure S9 (c): IR spectrum of 2-methyl-6,7-di(2-propenoxy)-5,8-quinolinedione (**20**).

# Compound Spectrum List Report

## Analysis Info

Analysis Name D:\Data\mk20.d  
Method low\_mass.m  
Sample Name TM Low concentration  
Comment

Acquisition Date 2/17/2017 11:49:27 AM  
Operator KM  
Instrument impact II 1825265.10082

## Acquisition Parameter

|             |          |                      |          |                  |           |
|-------------|----------|----------------------|----------|------------------|-----------|
| Source Type | ESI      | Ion Polarity         | Positive | Set Nebulizer    | 0.3 Bar   |
| Focus       | Active   | Set Capillary        | 4000 V   | Set Dry Heater   | 240 °C    |
| Scan Begin  | 100 m/z  | Set End Plate Offset | -500 V   | Set Dry Gas      | 4.0 l/min |
| Scan End    | 1000 m/z | Set Charging Voltage | 2000 V   | Set Divert Valve | Source    |
|             |          | Set Corona           | 0 nA     | Set APCI Heater  | 0 °C      |

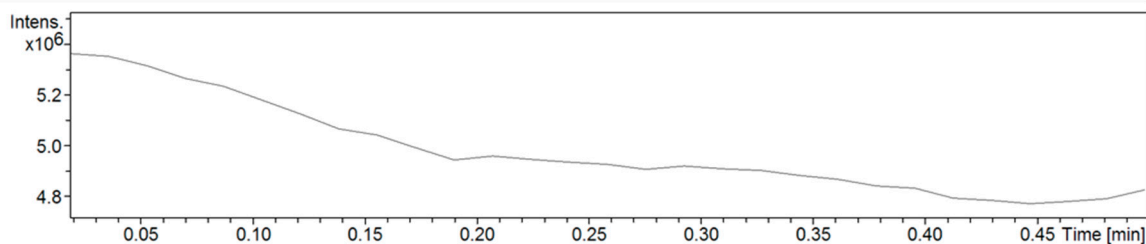

## +MS, 0.0-0.5min #1-29

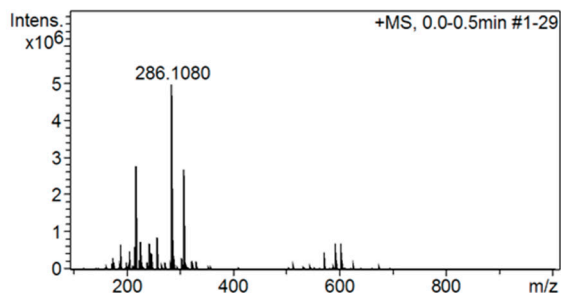

| # | m/z      | Res.  | S/N     | I       | I%    | FWHM   |
|---|----------|-------|---------|---------|-------|--------|
| 1 | 218.0814 | 33570 | 24482.1 | 2784530 | 55.8  | 0.0065 |
| 2 | 286.1080 | 38718 | 35629.9 | 4988728 | 100.0 | 0.0074 |

**Figure S9 (d):** HR-MS spectrum of 2-methyl-6,7-di(2-propenoxy)-5,8-quinolinedione (**20**).

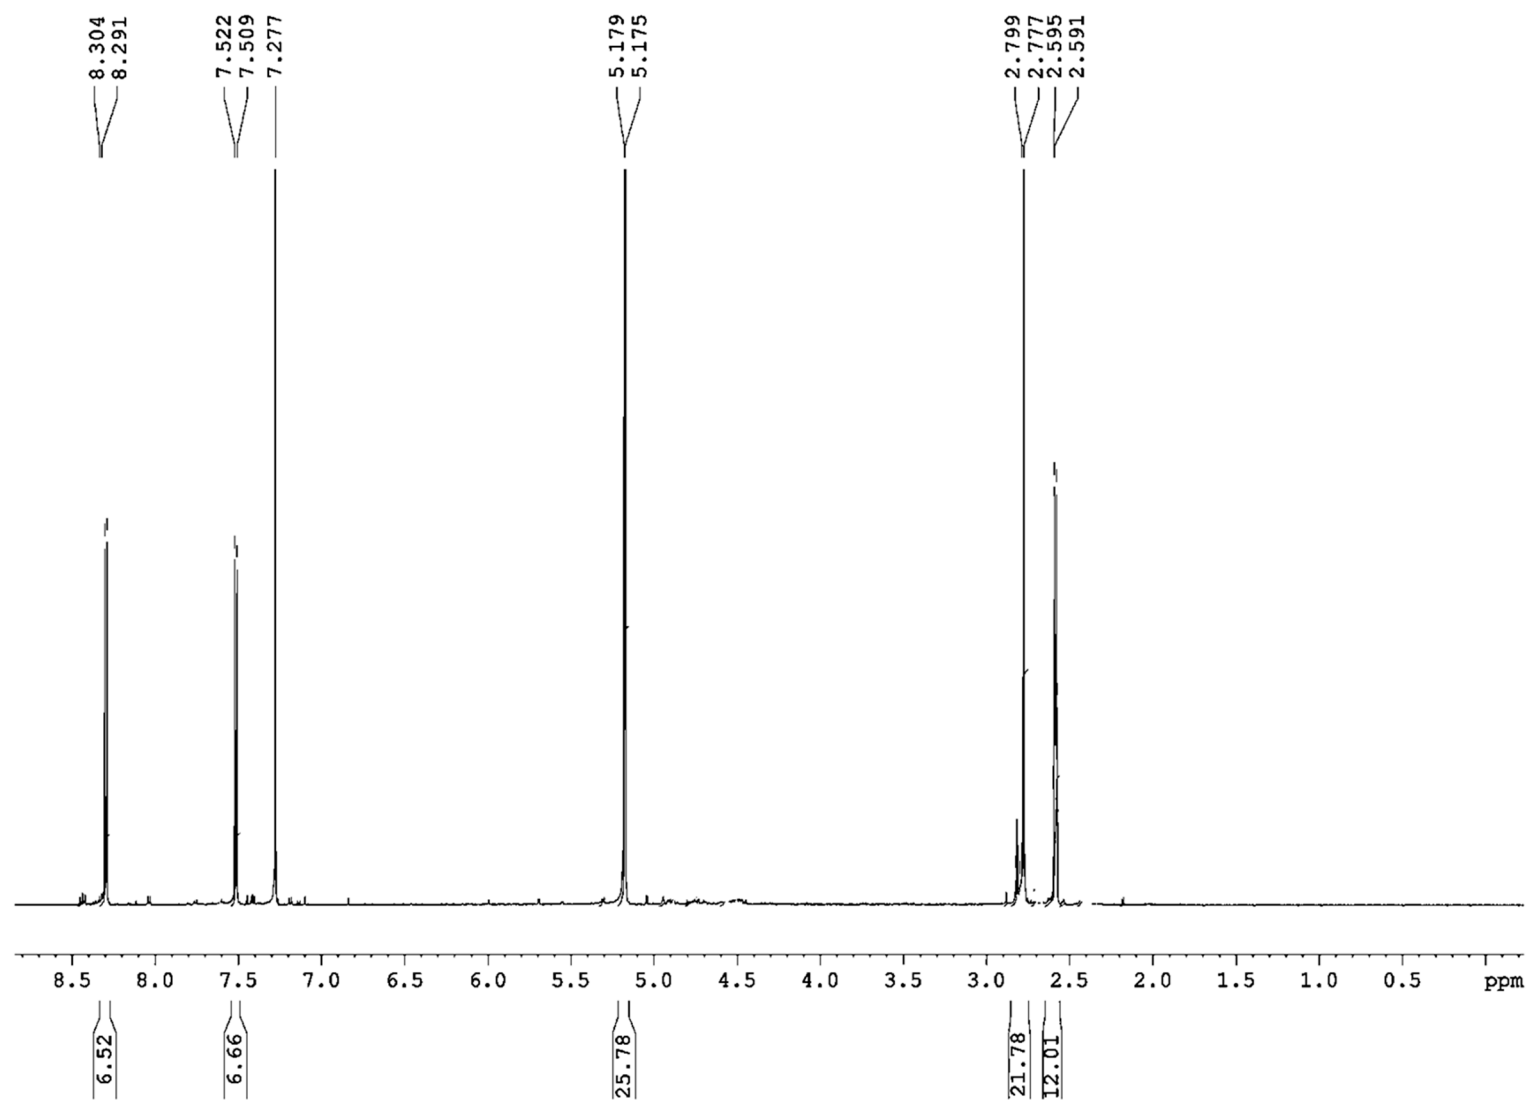

Figure S10 (a):  $^1\text{H-NMR}$  spectrum of 2-methyl-6,7-di(2-propynyloxy)-5,8-quinolinedione (21).



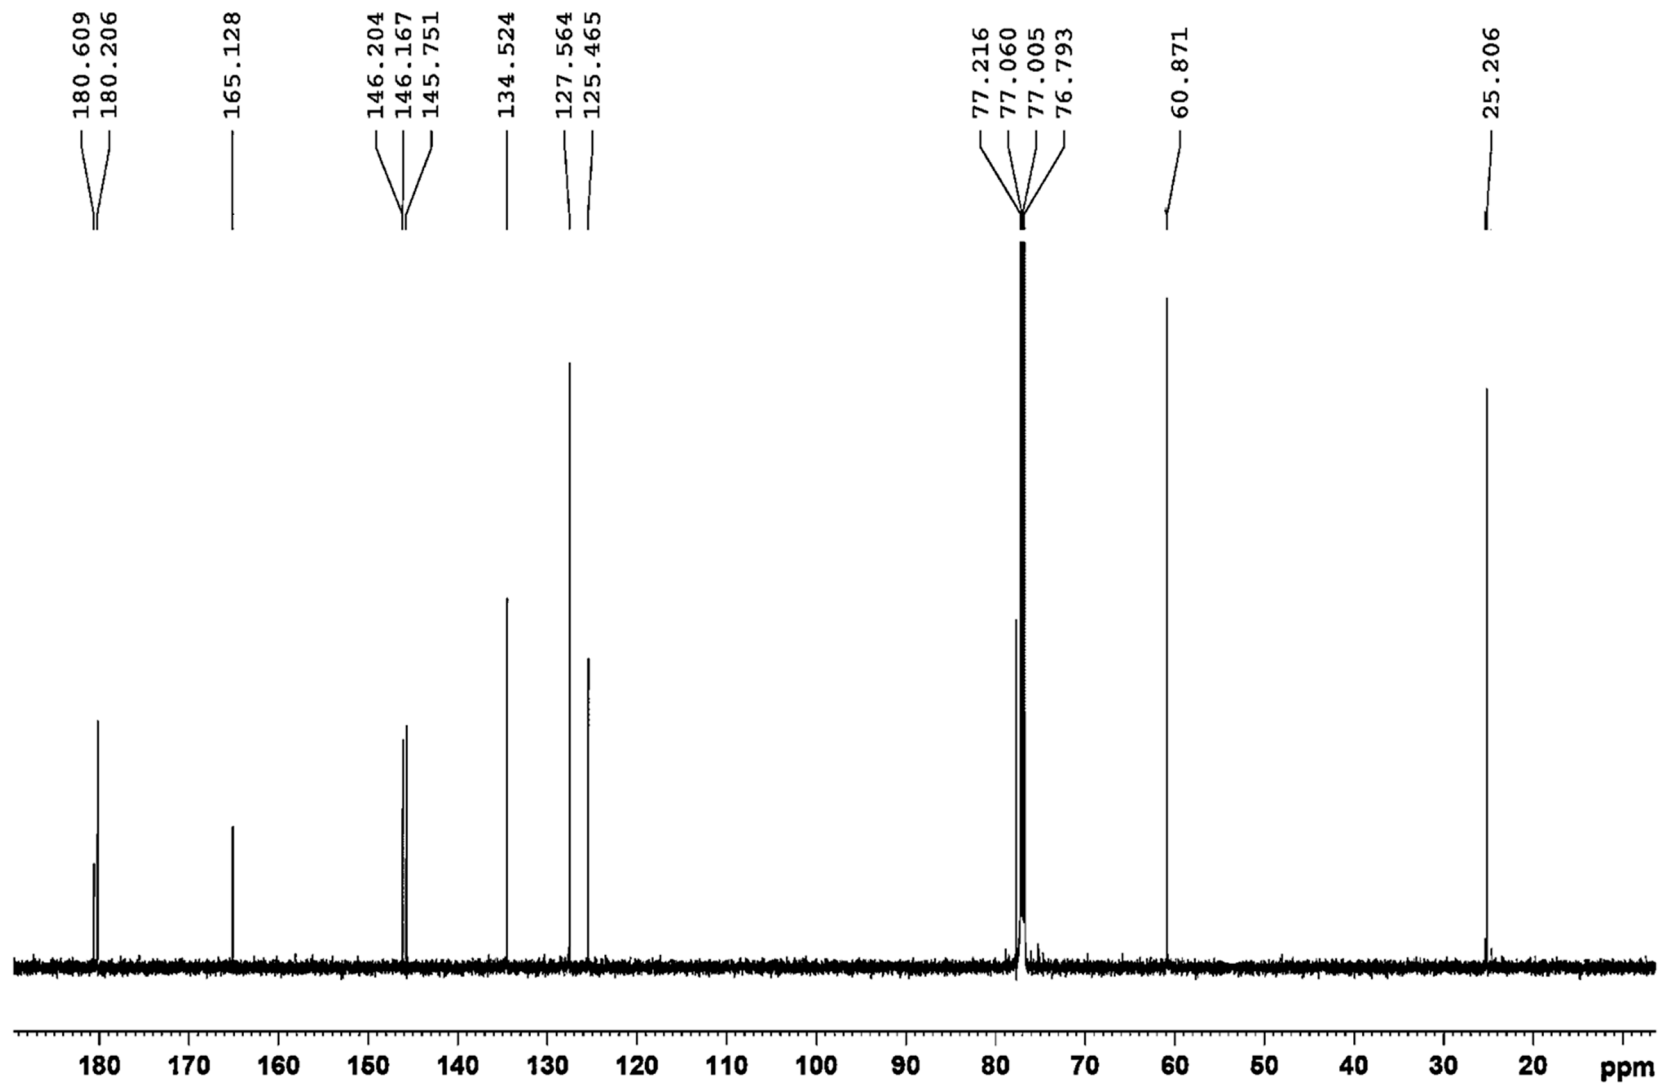

Figure S10 (b):  $^{13}\text{C}$ -NMR spectrum of 2-methyl-6,7-di(2-propynoxy)-5,8-quinolinedione (21).

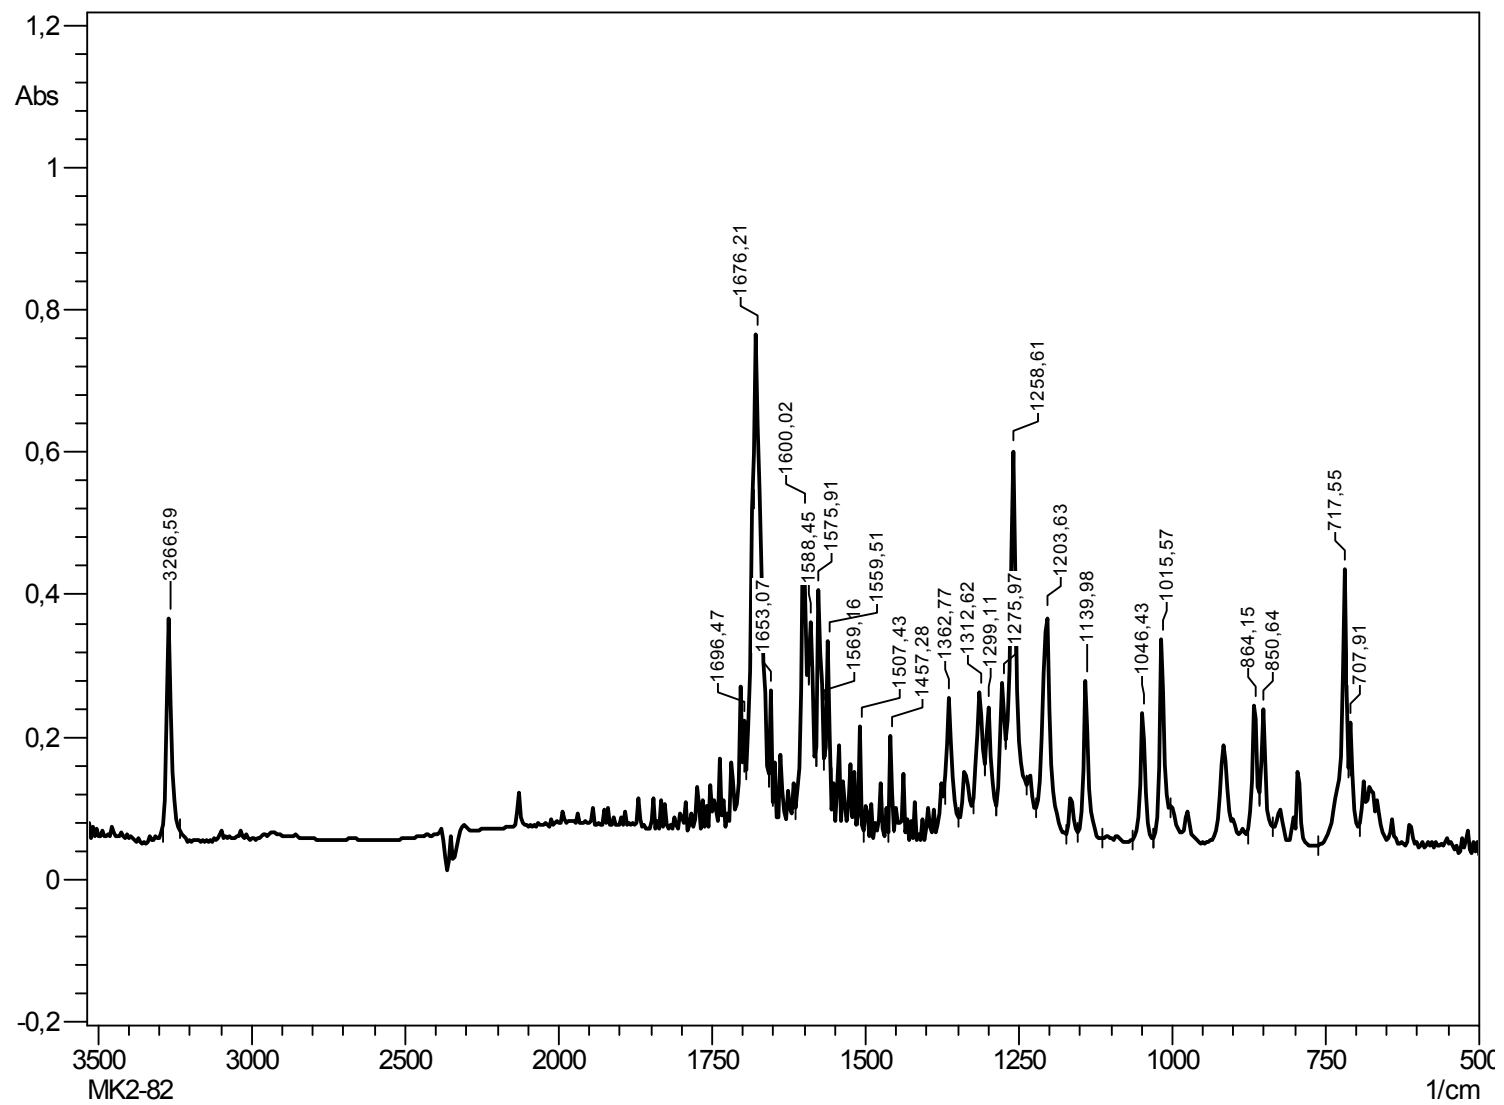

Figure S10 (c): IR spectrum of 2-methyl-6,7-di(2-propynyloxy)-5,8-quinolinedione (21).

# Compound Spectrum List Report

## Analysis Info

Analysis Name D:\Data\mk21.d  
Method low\_mass.m  
Sample Name TM Low concentration  
Comment

Acquisition Date 2/17/2017 11:51:42 AM  
Operator KM  
Instrument impact II 1825265.10082

## Acquisition Parameter

|             |          |                      |          |                  |           |
|-------------|----------|----------------------|----------|------------------|-----------|
| Source Type | ESI      | Ion Polarity         | Positive | Set Nebulizer    | 0.3 Bar   |
| Focus       | Active   | Set Capillary        | 4000 V   | Set Dry Heater   | 240 °C    |
| Scan Begin  | 100 m/z  | Set End Plate Offset | -500 V   | Set Dry Gas      | 4.0 l/min |
| Scan End    | 1000 m/z | Set Charging Voltage | 2000 V   | Set Divert Valve | Source    |
|             |          | Set Corona           | 0 nA     | Set APCI Heater  | 0 °C      |

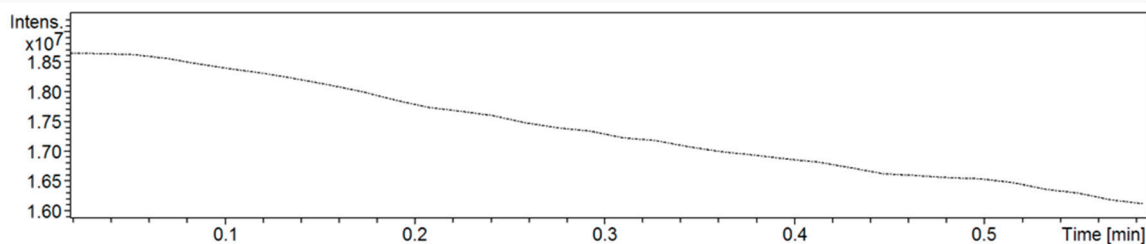

## +MS, 0.0-0.6min #1-34

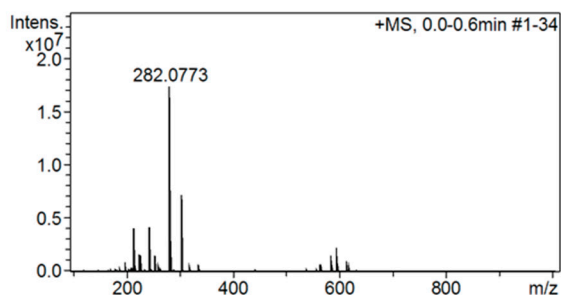

| # | m/z      | Res.  | S/N     | I        | I%    | FWHM   |
|---|----------|-------|---------|----------|-------|--------|
| 1 | 215.0583 | 34252 | 28665.4 | 4067549  | 23.4  | 0.0063 |
| 2 | 243.0535 | 36356 | 24559.0 | 4189061  | 24.1  | 0.0067 |
| 3 | 282.0773 | 36894 | 81856.9 | 17400966 | 100.0 | 0.0076 |

**Figure S10 (d):** HR-MS spectrum of 2-methyl-6,7-di(2-propyloxy)-5,8-quinolinedione (**21**).

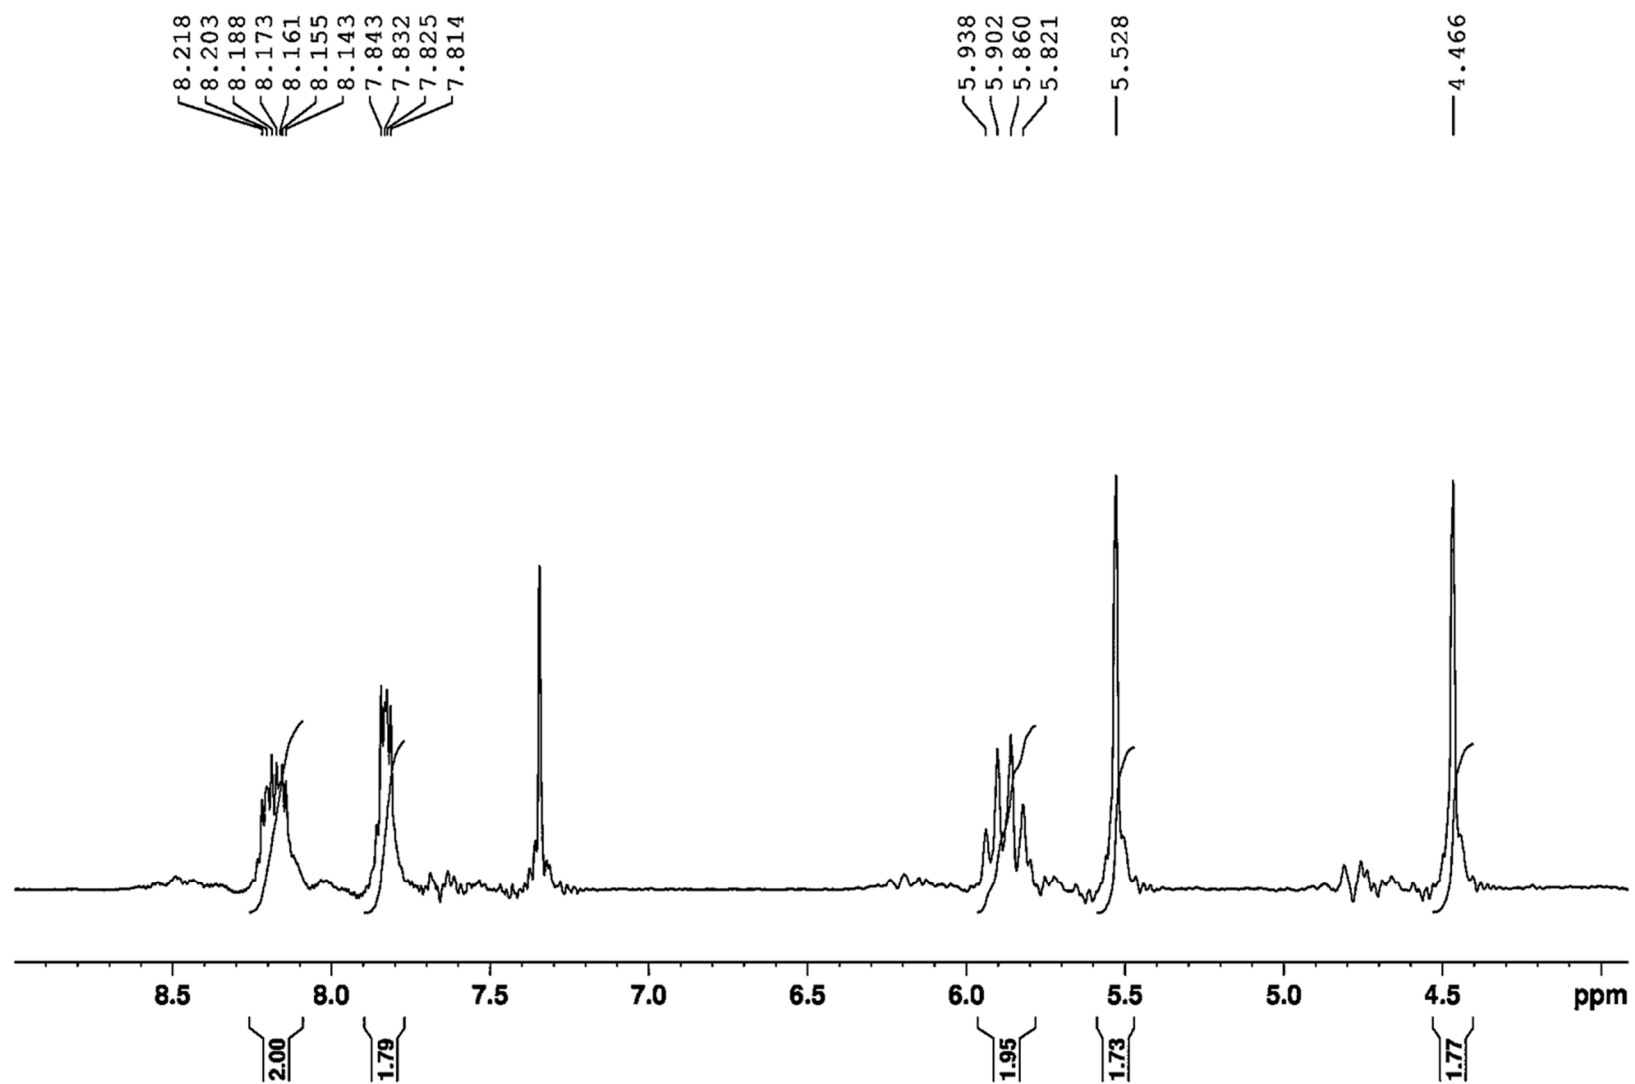

Figure S11 (a):  $^{13}\text{C}$ -NMR spectrum of 2-chloro-3-(8-hydroxy-4-octen-2,6-diynyloxy)-1,4-naphtoquinon (23).

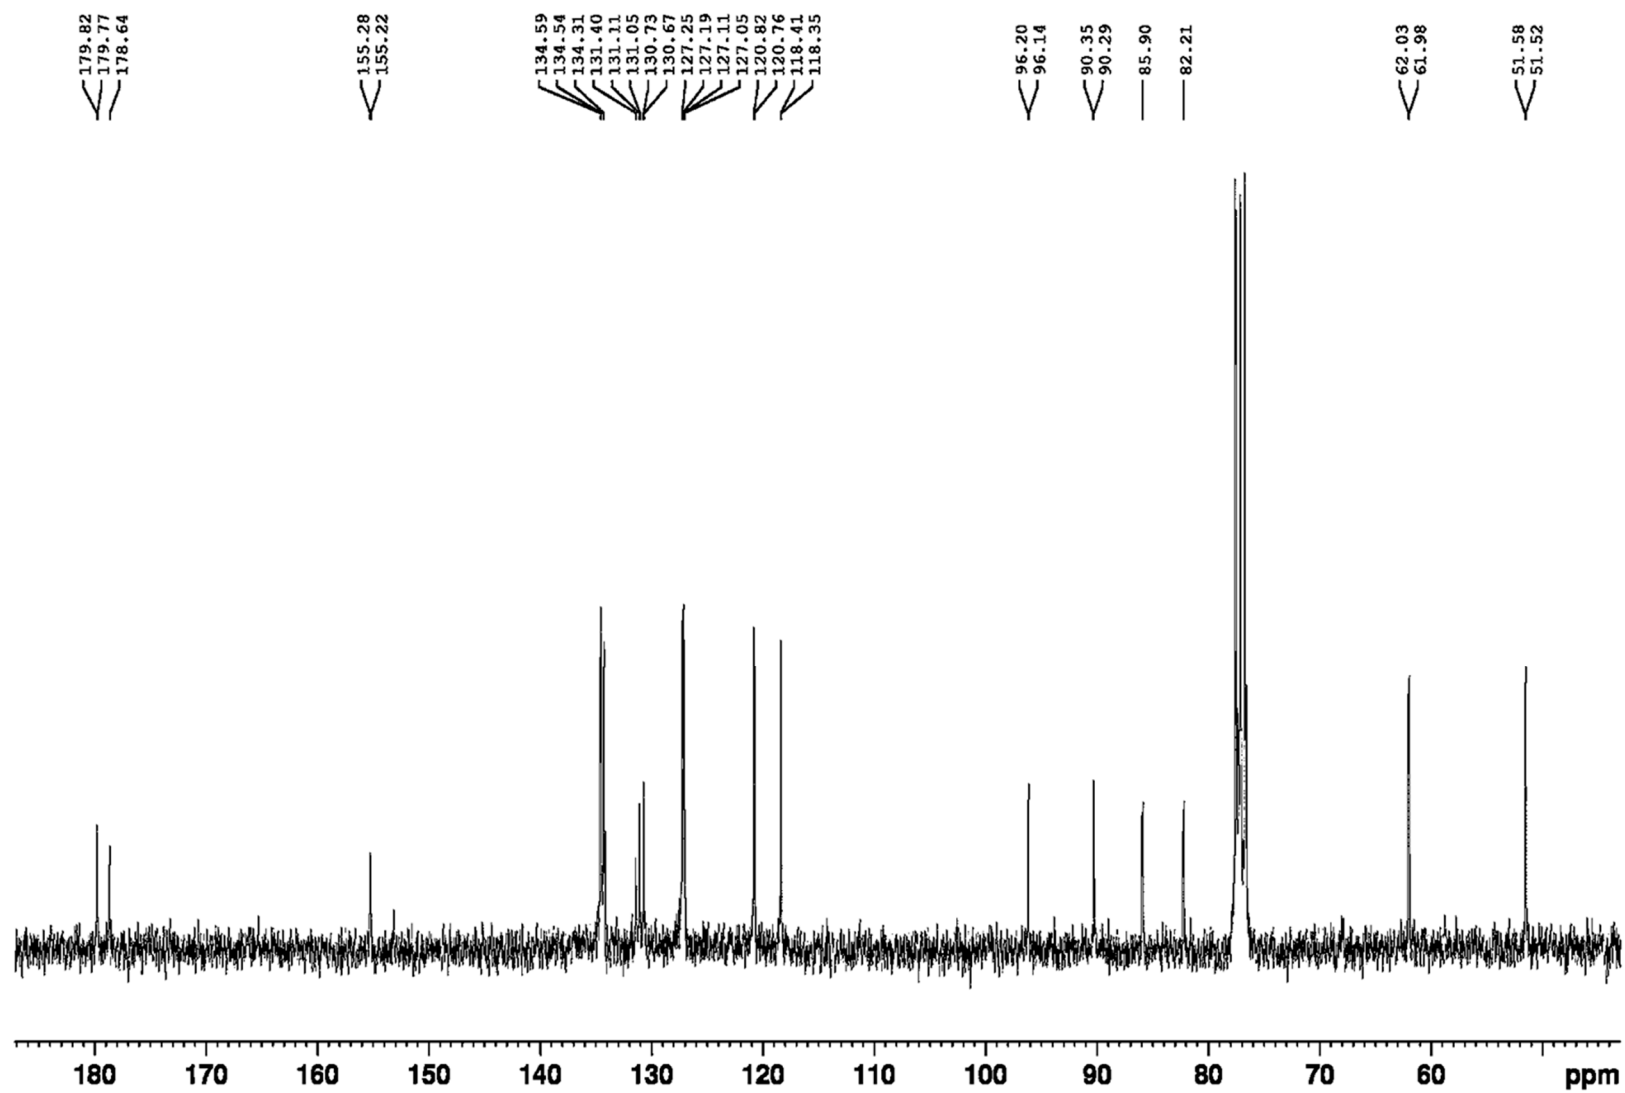

Figure S11 (b):  $^{13}\text{C}$ -NMR spectrum of 2-chloro-3-(8-hydroxy-4-octen-2,6-diynyloxy)-1,4-napthoquinon (23).

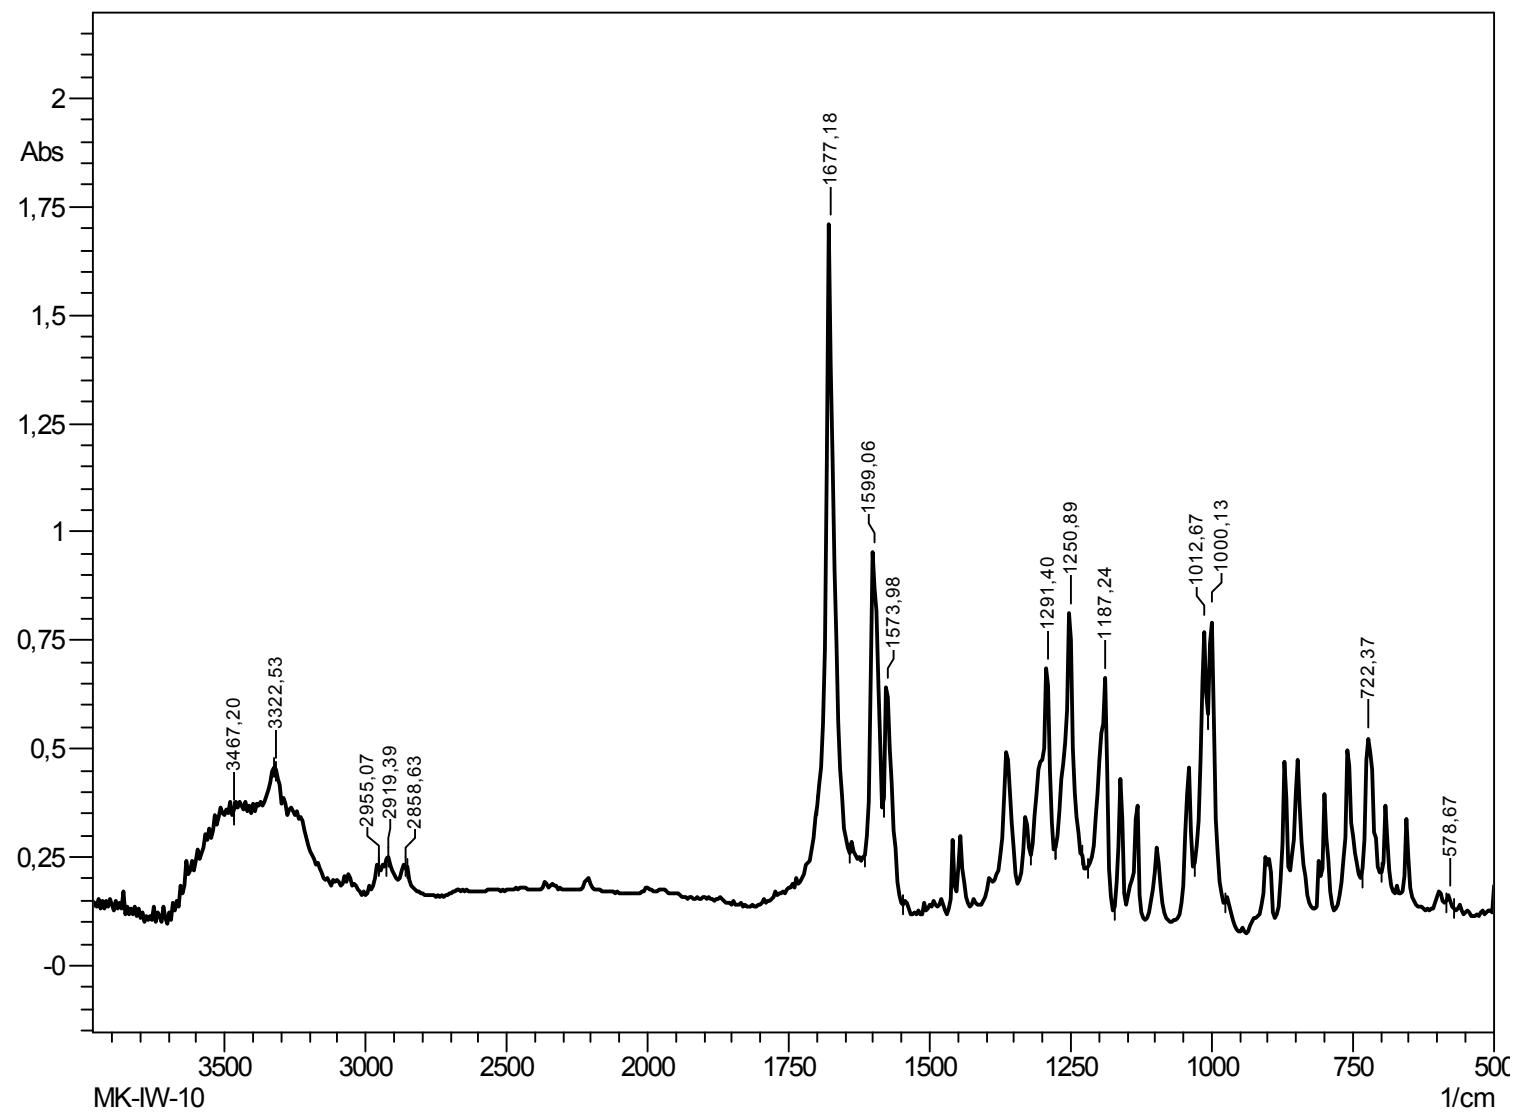

**Figure S11 (c):** IR spectrum of 2-chloro-3-(8-hydroxy-4-octen-2,6-diynyloxy)-1,4-naphthoquinon (23).

# Compound Spectrum List Report

## Analysis Info

Analysis Name D:\Data\mk23.d  
Method low\_mass.m  
Sample Name TM Low concentration  
Comment

Acquisition Date 2/17/2017 11:54:33 AM  
Operator KM  
Instrument impact II 1825265.10082

## Acquisition Parameter

|             |          |                      |          |                  |           |
|-------------|----------|----------------------|----------|------------------|-----------|
| Source Type | ESI      | Ion Polarity         | Positive | Set Nebulizer    | 0.3 Bar   |
| Focus       | Active   | Set Capillary        | 4000 V   | Set Dry Heater   | 240 °C    |
| Scan Begin  | 100 m/z  | Set End Plate Offset | -500 V   | Set Dry Gas      | 4.0 l/min |
| Scan End    | 1000 m/z | Set Charging Voltage | 2000 V   | Set Divert Valve | Source    |
|             |          | Set Corona           | 0 nA     | Set APCI Heater  | 0 °C      |

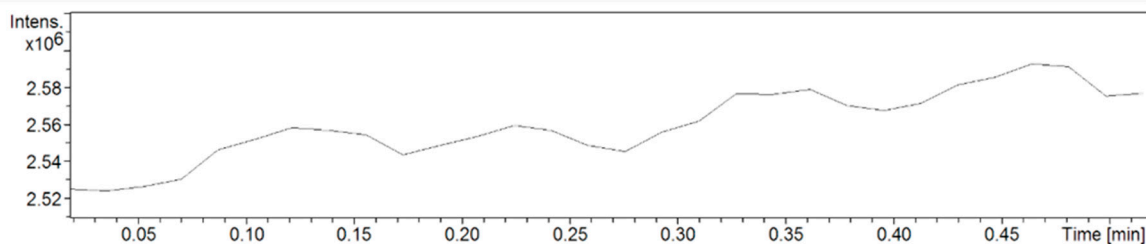

## +MS, 0.0-0.5min #1-30

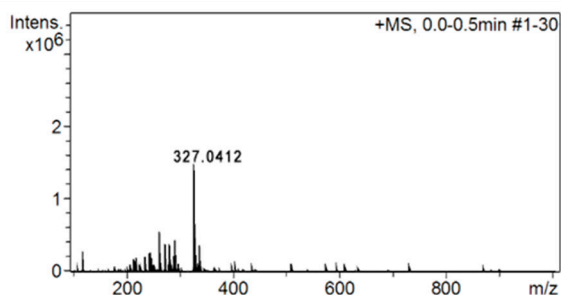

| # | m/z      | Res.  | S/N    | I       | I %   | FWHM   |
|---|----------|-------|--------|---------|-------|--------|
| 1 | 327.0412 | 36833 | 9911.9 | 1462938 | 100.0 | 0.0084 |

**Figure S11 (d):** HR-MS spectrum of 2-chloro-3-(8-hydroxy-4-octen-2,6-diynyoxy)-1,4-naphthoquinon (23).

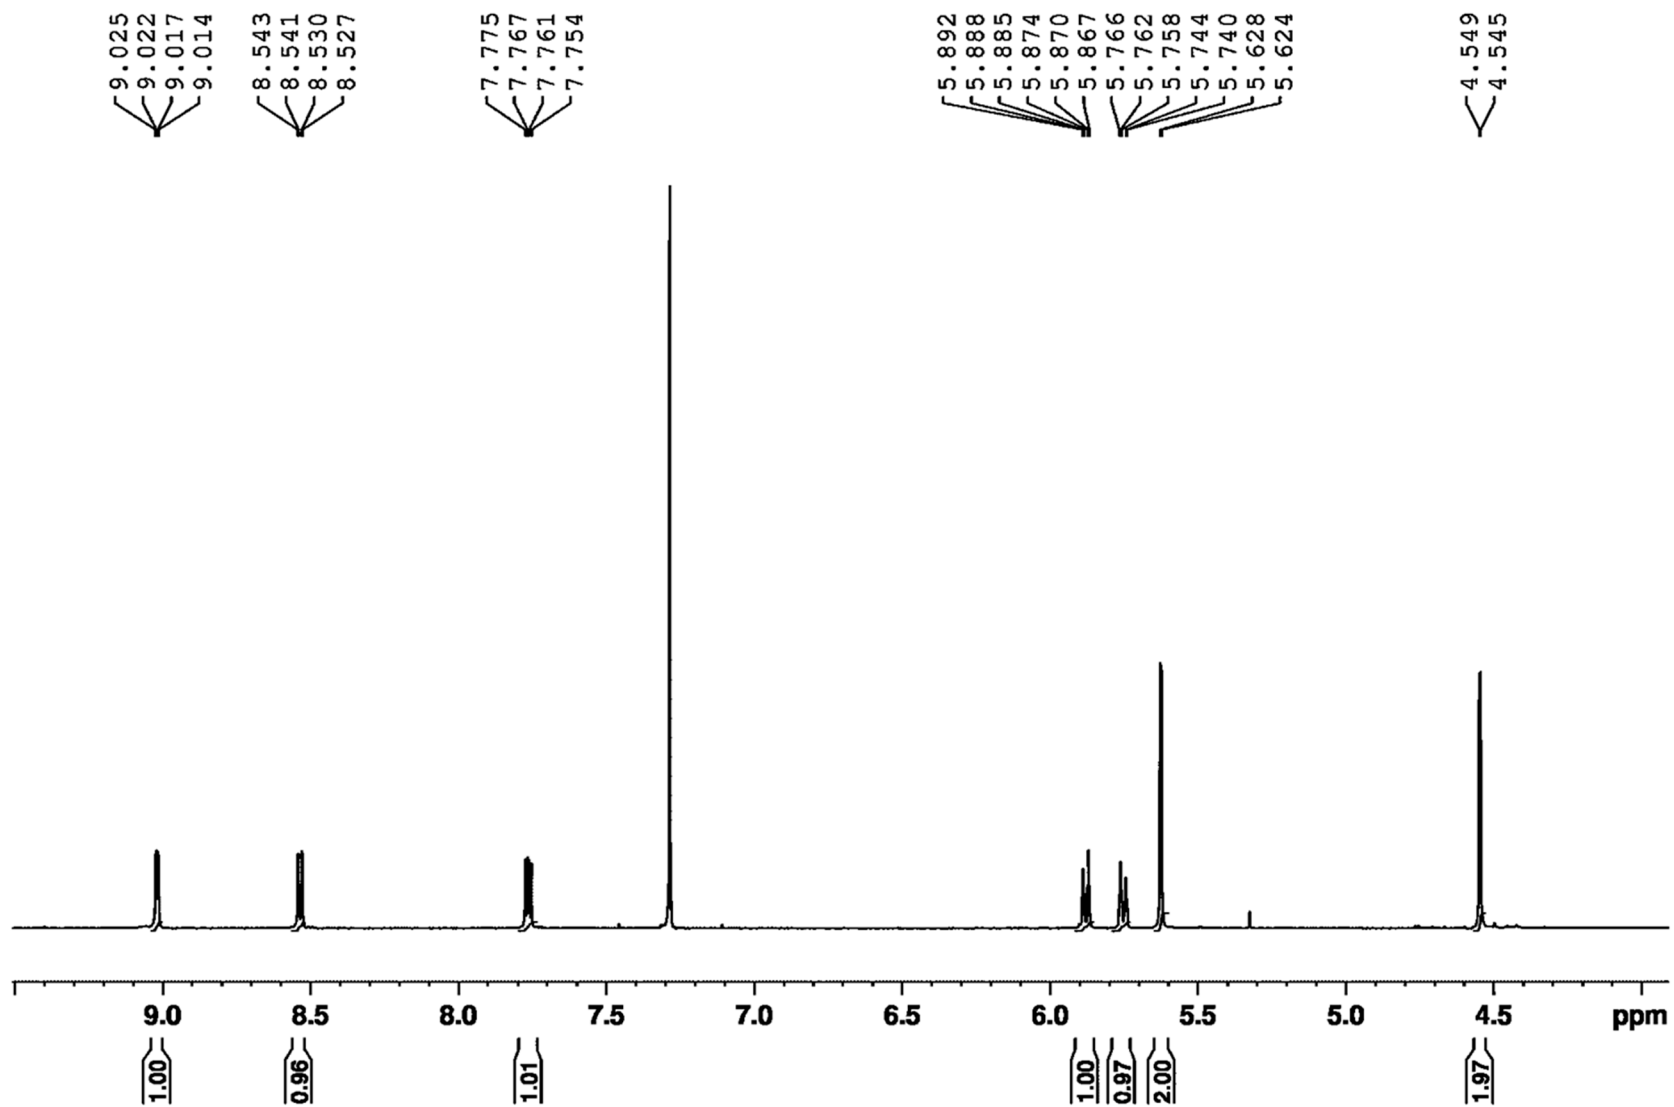

Figure S12 (a): <sup>1</sup>H-NMR spectrum of 6-chloro-7-(8-hydroxy-4-octen-2,6-diynyloxy)-5,8-quinolinedione (24).



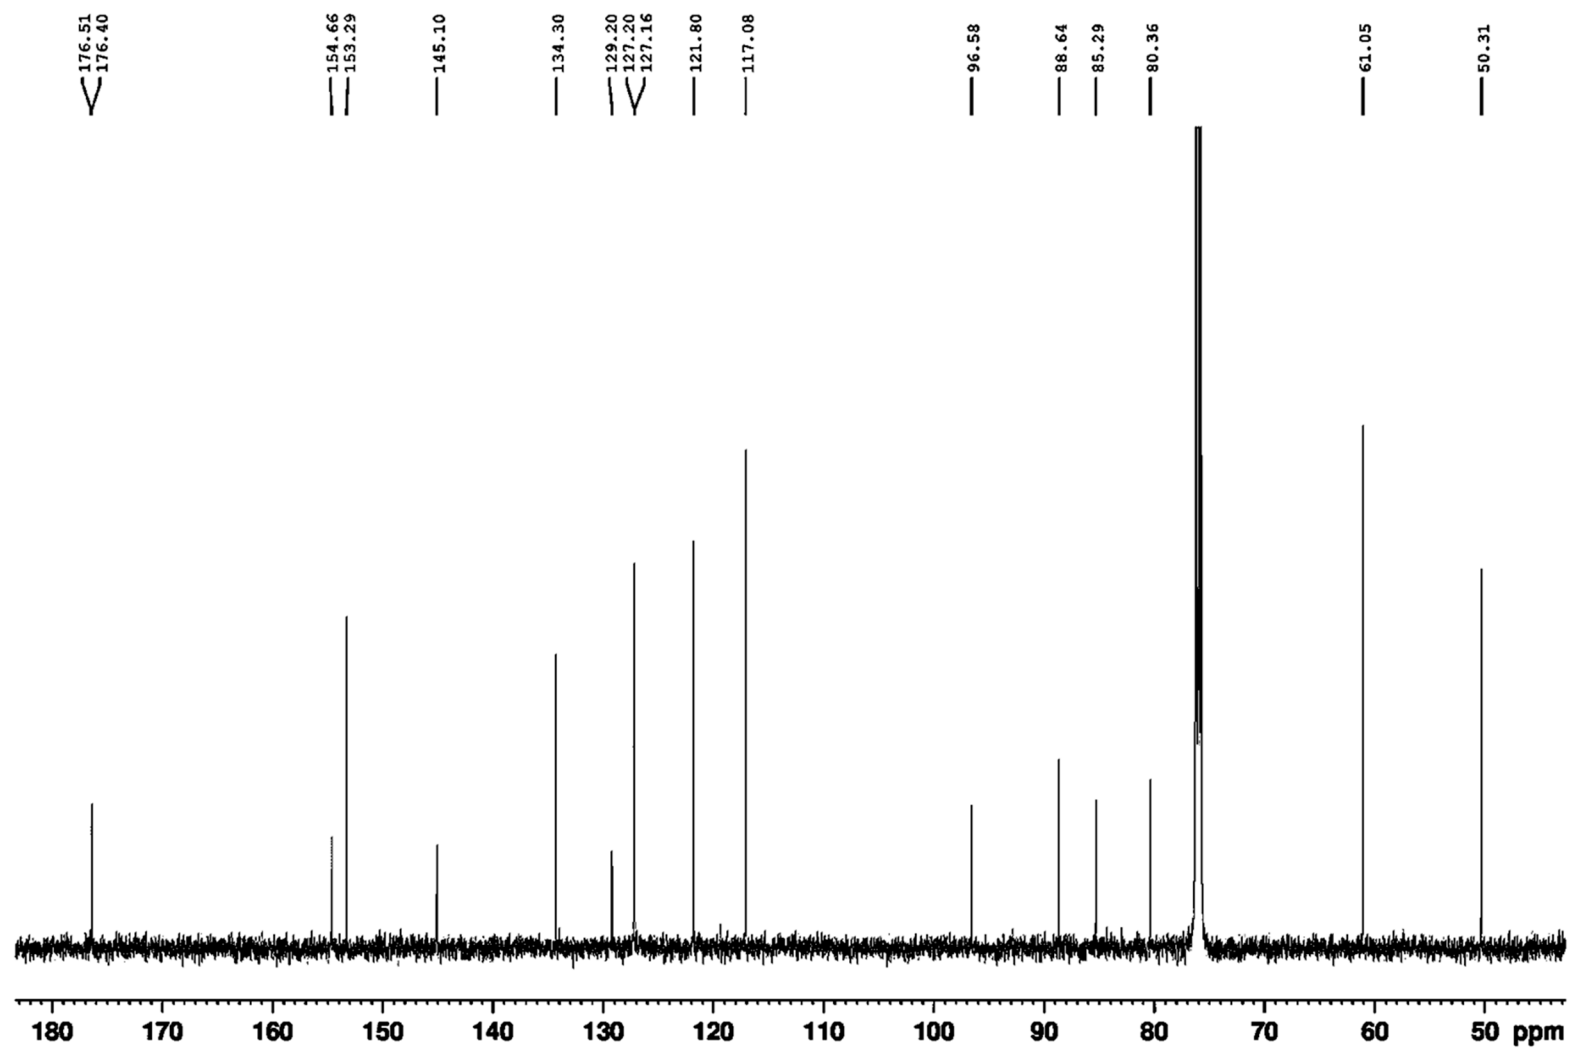

Figure S12 (b):  $^{13}\text{C}$ -NMR spectrum of 6-chloro-7-(8-hydroxy-4-octen-2,6-diynyloxy)-5,8-quinolinedione (24).

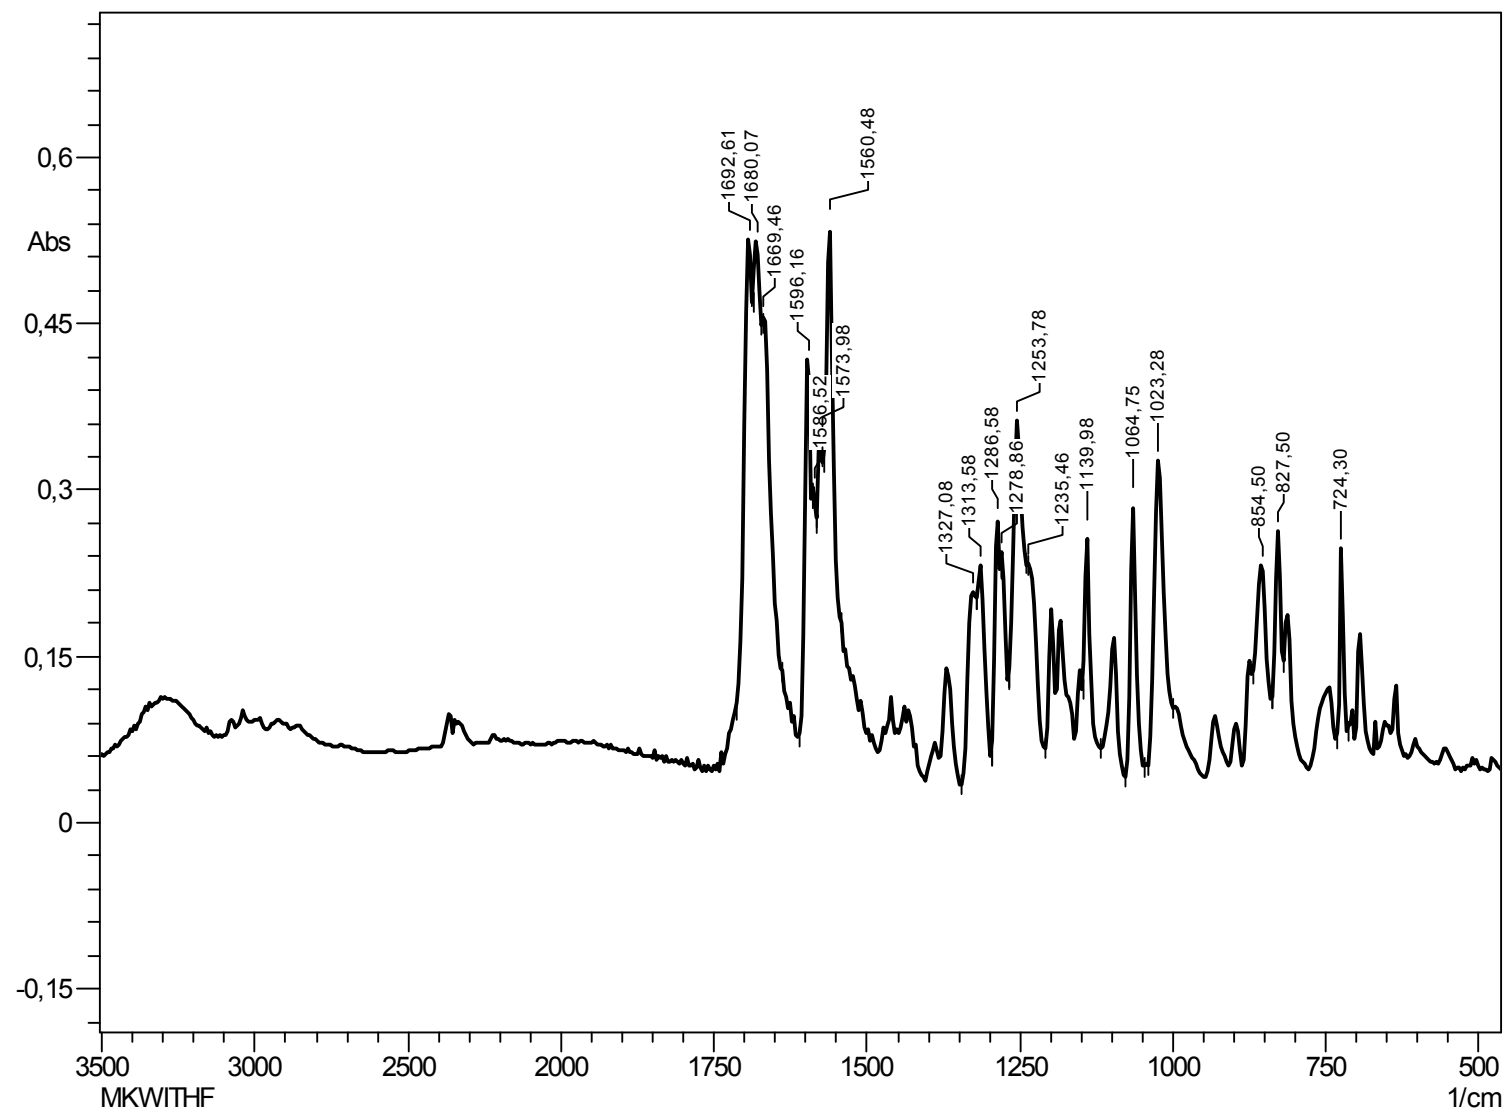

Figure S12 (c): IR spectrum of 6-chloro-7-(8-hydroxy-4-octen-2,6-diynoxy)-5,8-quinolinedione (**24**).

# Compound Spectrum List Report

## Analysis Info

Analysis Name D:\Data\mk24.d  
Method low\_mass.m  
Sample Name TM Low concentration  
Comment

Acquisition Date 2/17/2017 11:56:47 AM  
Operator KM  
Instrument impact II 1825265.10082

## Acquisition Parameter

|             |          |                      |          |                  |           |
|-------------|----------|----------------------|----------|------------------|-----------|
| Source Type | ESI      | Ion Polarity         | Positive | Set Nebulizer    | 0.3 Bar   |
| Focus       | Active   | Set Capillary        | 4000 V   | Set Dry Heater   | 240 °C    |
| Scan Begin  | 100 m/z  | Set End Plate Offset | -500 V   | Set Dry Gas      | 4.0 l/min |
| Scan End    | 1000 m/z | Set Charging Voltage | 2000 V   | Set Divert Valve | Source    |
|             |          | Set Corona           | 0 nA     | Set APCI Heater  | 0 °C      |

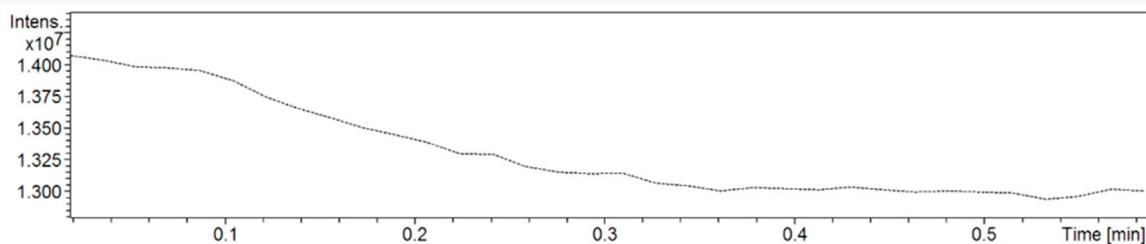

## +MS, 0.0-0.6min #1-34

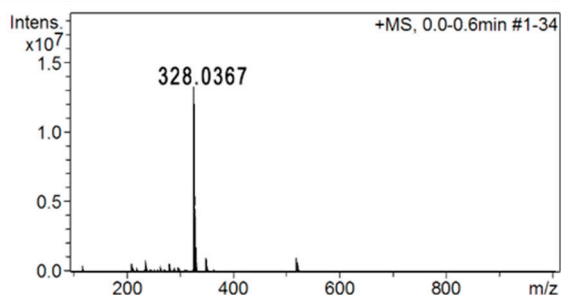

| # | m/z      | Res.  | S/N     | I       | I%    | FWHM   |
|---|----------|-------|---------|---------|-------|--------|
| 1 | 328.0367 | 39636 | 18184.0 | 3513484 | 100.0 | 0.0078 |

**Figure S12 (d):** HR-MS spectrum of 6-chloro-7-(8-hydroxy-4-octen-2,6-dinyloxy)-5,8-quinolinedione (24).

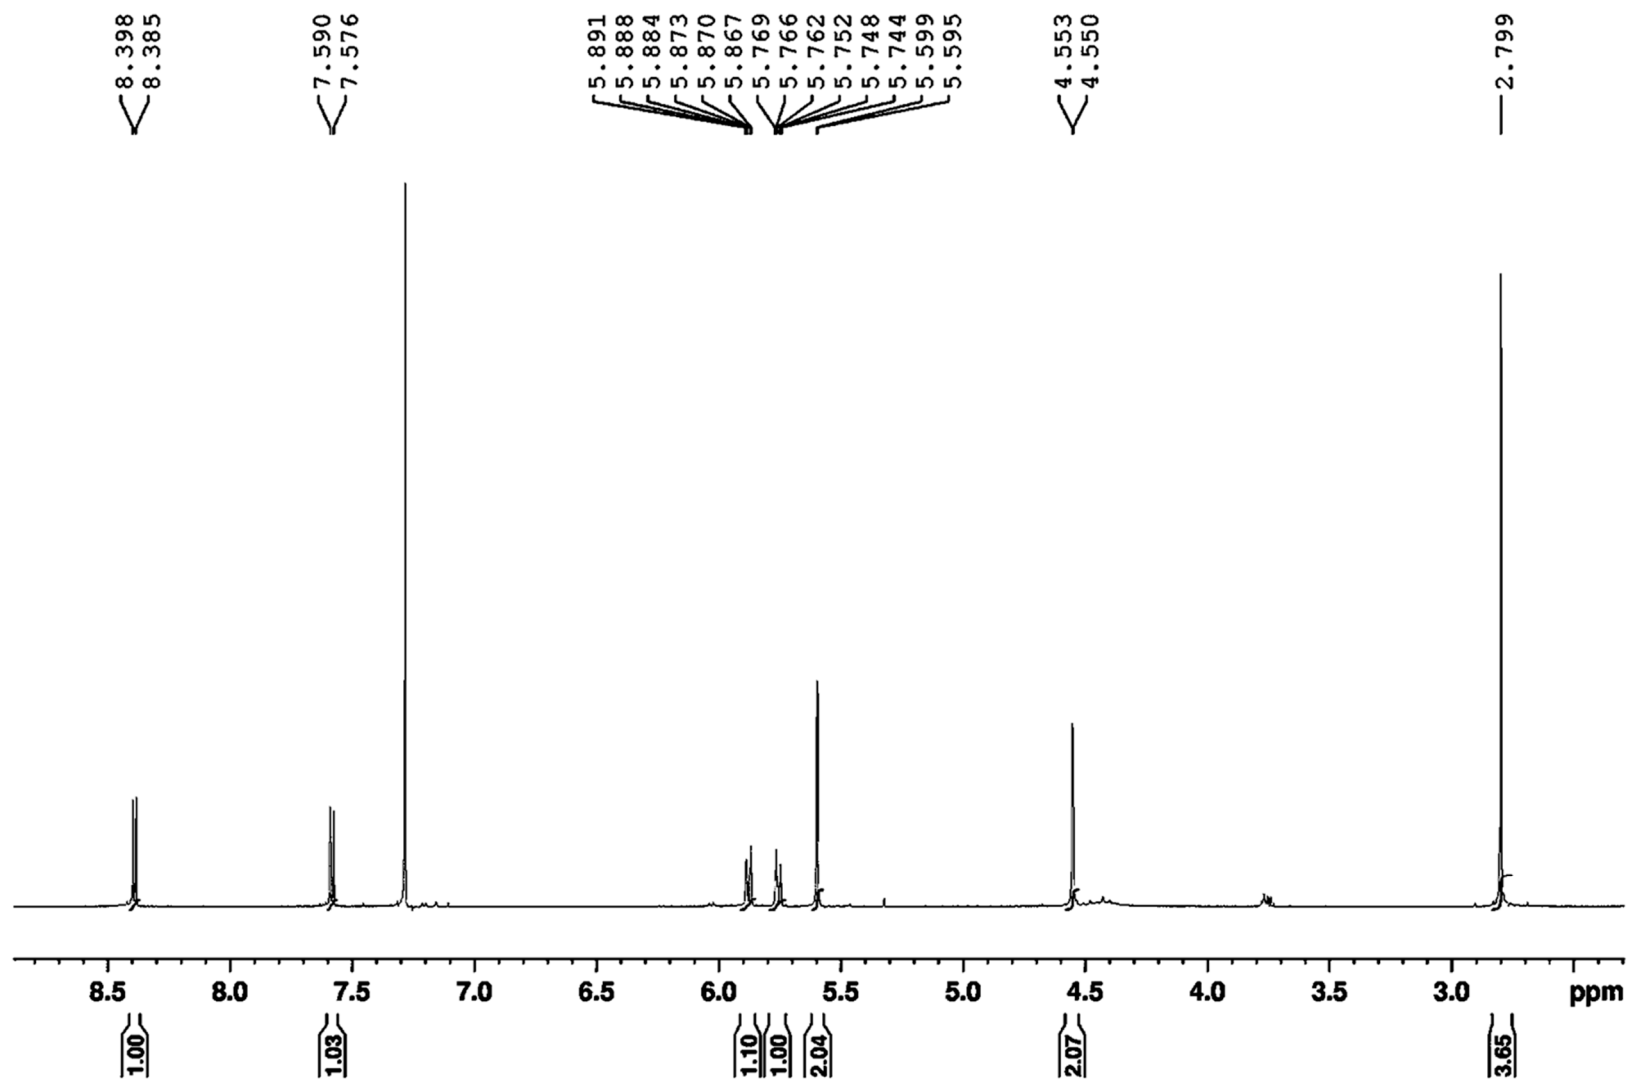

Figure S13 (a): <sup>1</sup>H-NMR spectrum of 6-chloro-7-(8-hydroxy-4-octen-2,6-diynoxy)-2-methyl-5,8-quinolinedione (25).

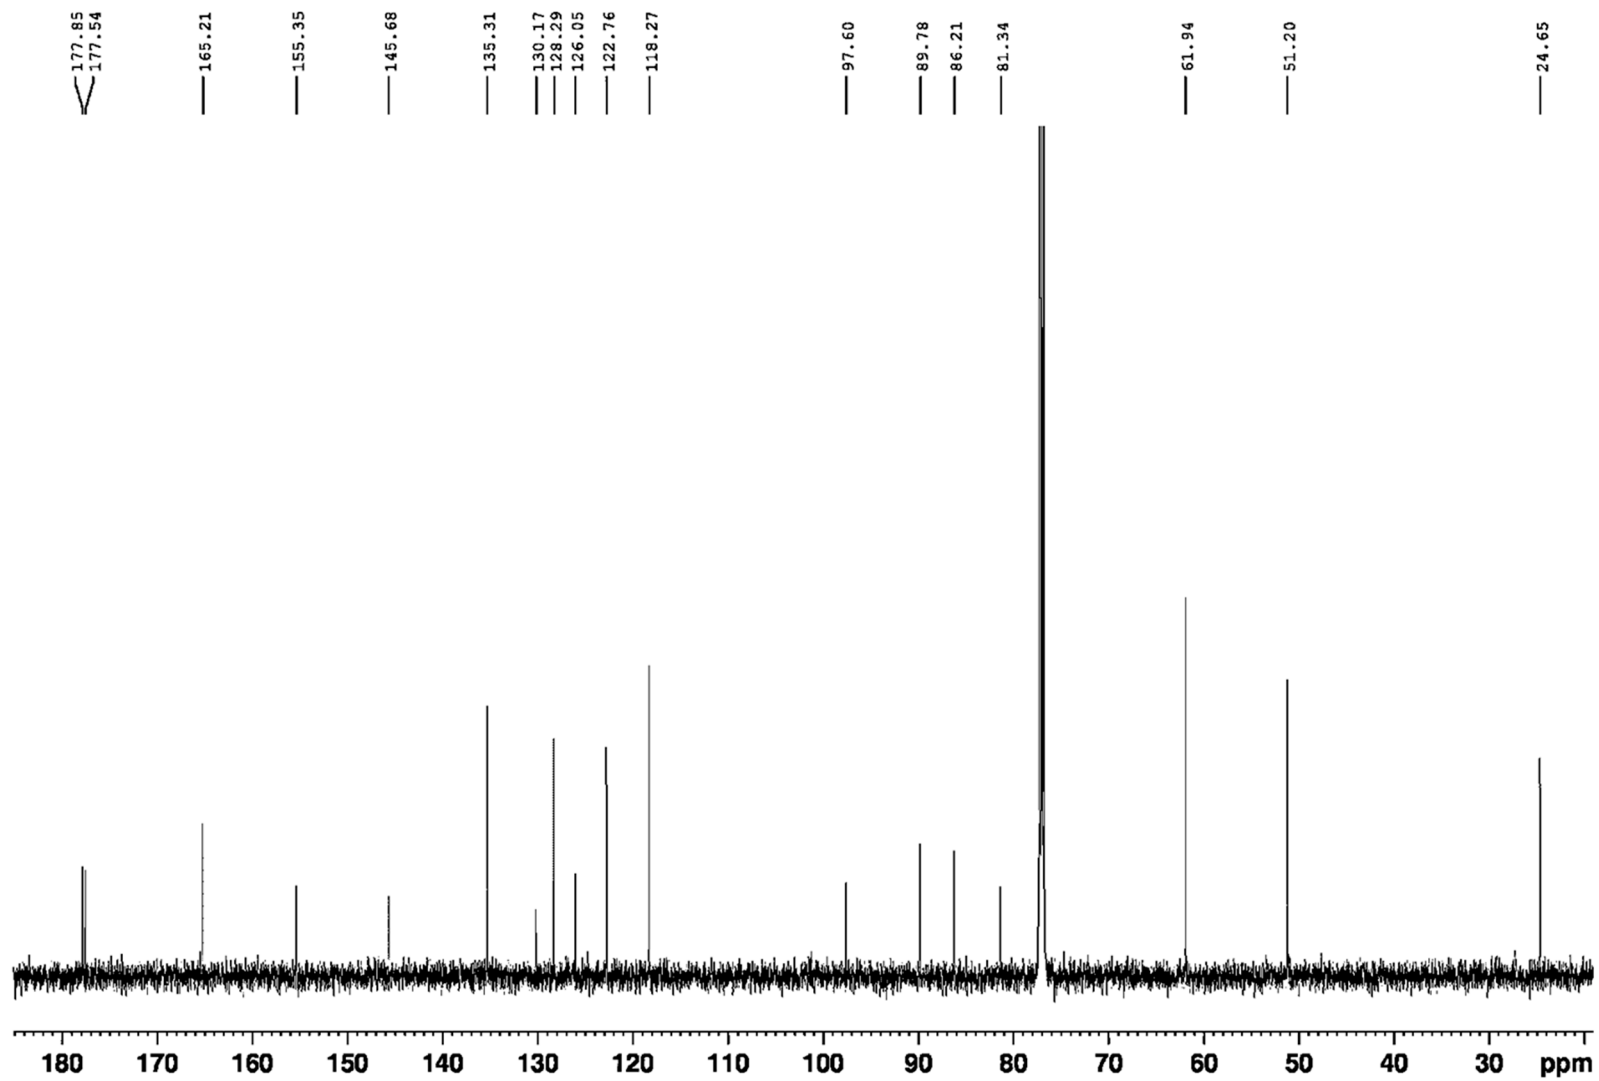

Figure S13 (b):  $^{13}\text{C}$ -NMR spectrum of 6-chloro-7-(8-hydroxy-4-octen-2,6-diynoxy)-2-methyl-5,8-quinolinedione (25).

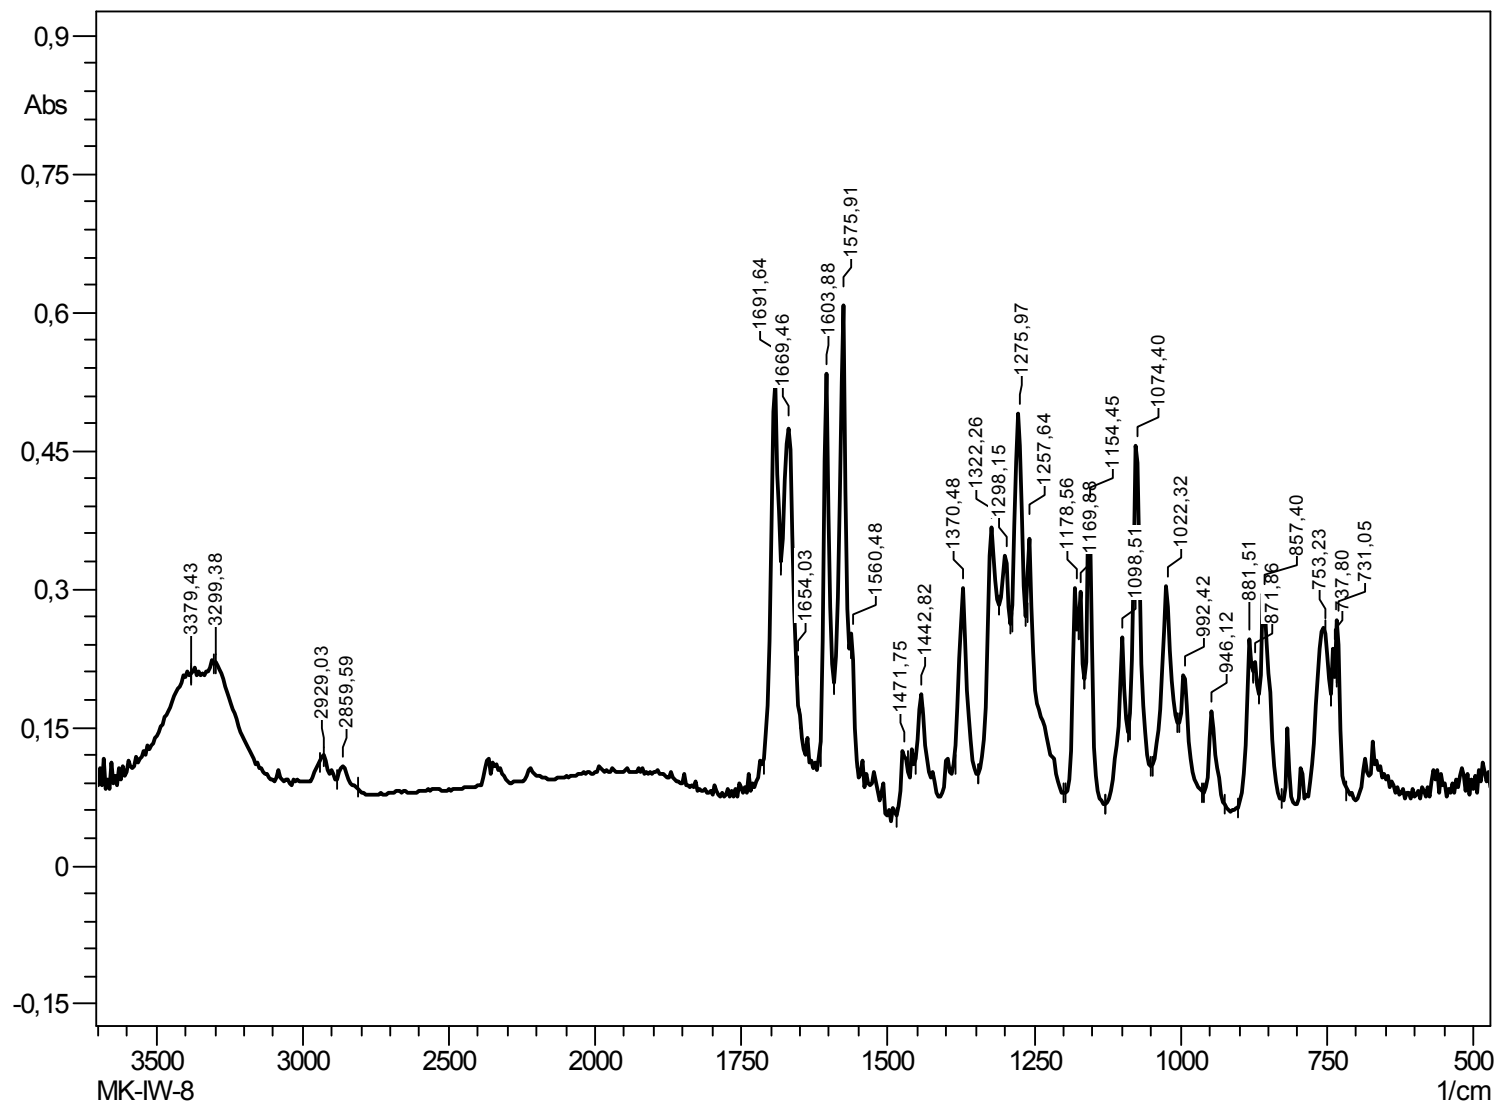

Figure S13 (c): IR spectrum of 6-chloro-7-(8-hydroxy-4-octen-2,6-diynyloxy)-2-methyl-5,8-quinolinedione (25).

# Compound Spectrum List Report

## Analysis Info

Analysis Name D:\Data\mk25.d  
Method low\_mass.m  
Sample Name TM Low concentration  
Comment

Acquisition Date 2/17/2017 12:00:40 PM  
Operator KM  
Instrument impact II 1825265.10082

## Acquisition Parameter

|             |          |                      |          |                  |           |
|-------------|----------|----------------------|----------|------------------|-----------|
| Source Type | ESI      | Ion Polarity         | Positive | Set Nebulizer    | 0.3 Bar   |
| Focus       | Active   | Set Capillary        | 4000 V   | Set Dry Heater   | 240 °C    |
| Scan Begin  | 100 m/z  | Set End Plate Offset | -500 V   | Set Dry Gas      | 4.0 l/min |
| Scan End    | 1000 m/z | Set Charging Voltage | 2000 V   | Set Divert Valve | Source    |
|             |          | Set Corona           | 0 nA     | Set APCI Heater  | 0 °C      |

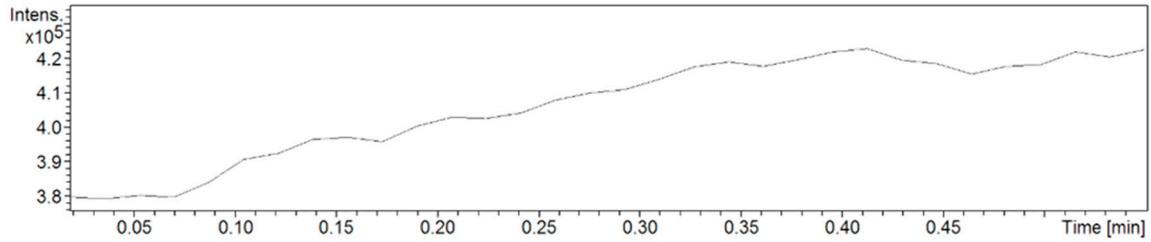

## +MS, 0.0-0.5min #1-32

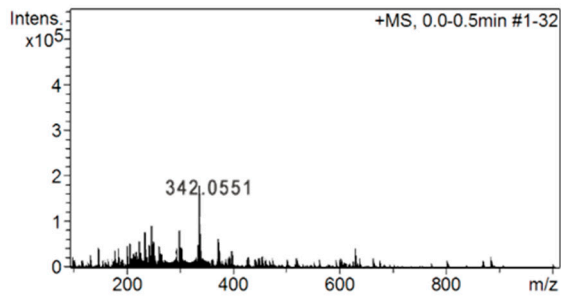

| # | m/z      | Res.  | S/N    | I      | I%    | FWHM   |
|---|----------|-------|--------|--------|-------|--------|
| 1 | 342.0551 | 32280 | 3301.4 | 406672 | 100.0 | 0.0097 |

**Figure S13 (d):** HR-MS spectrum of 6-chloro-7-(8-hydroxy-4-octen-2,6-diynyl-2-yl)-2-methyl-5,8-quinolinedione (**25**).

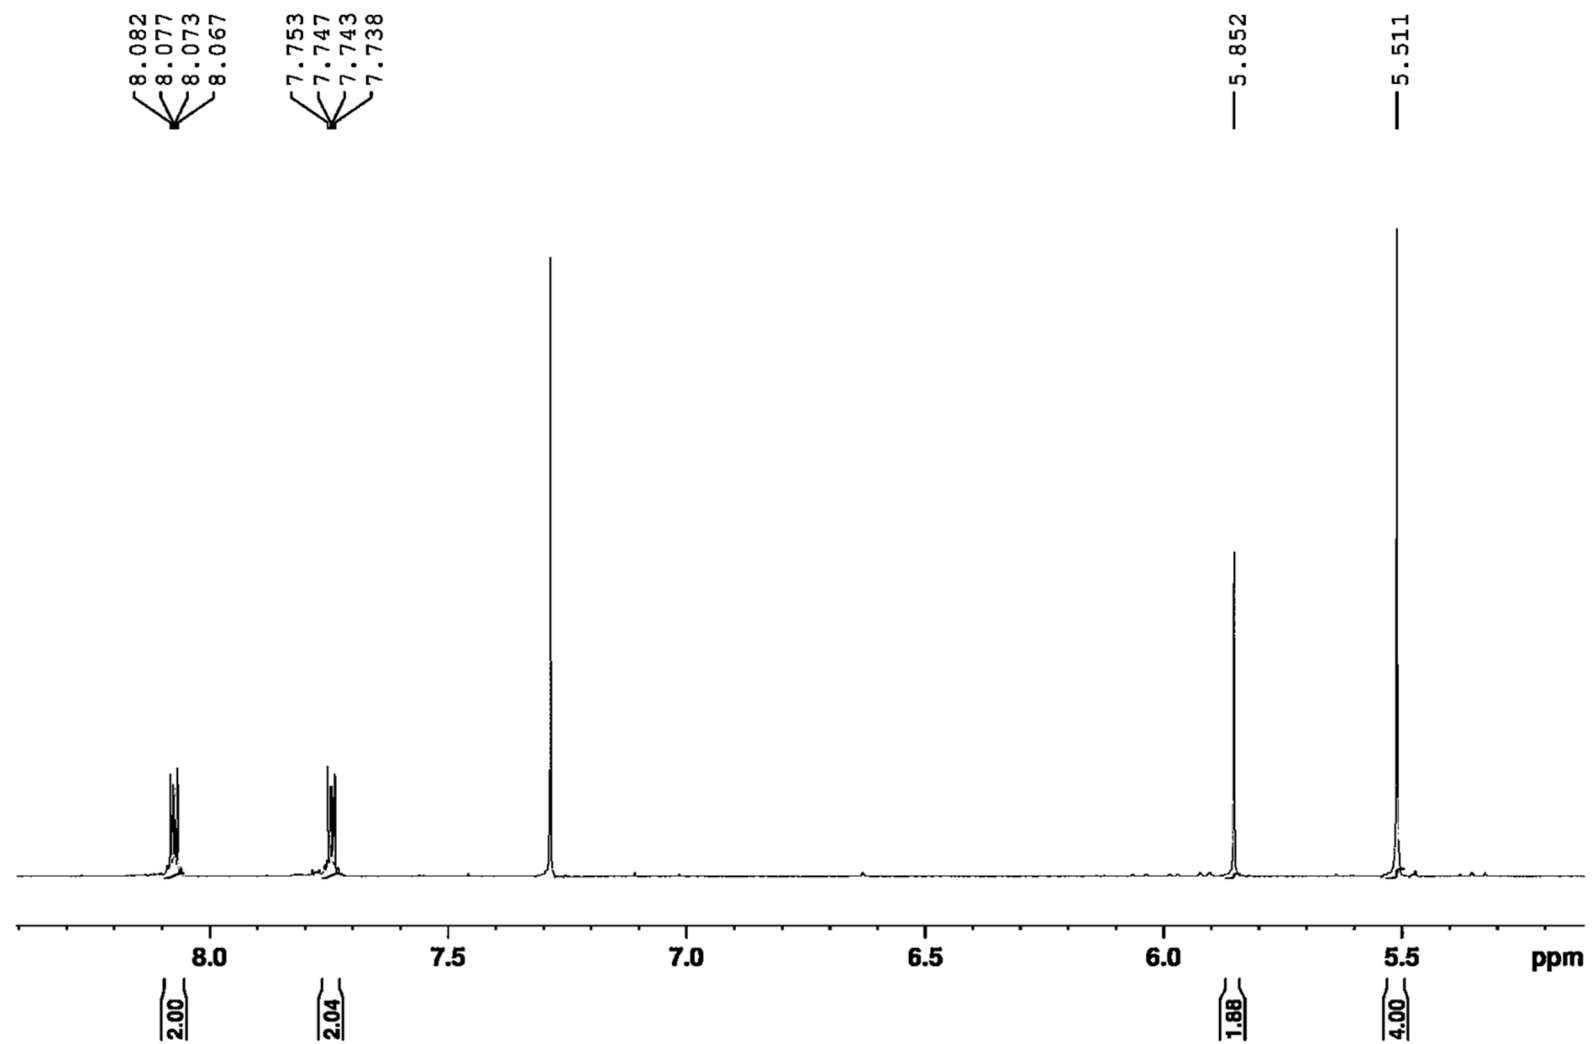

Figure S14 (a): <sup>1</sup>H-NMR spectrum of 8-octen-6,10-diynyl-1,4-dioxocyclododeca[2,3-g]-1,4-naphthoquinon (26).



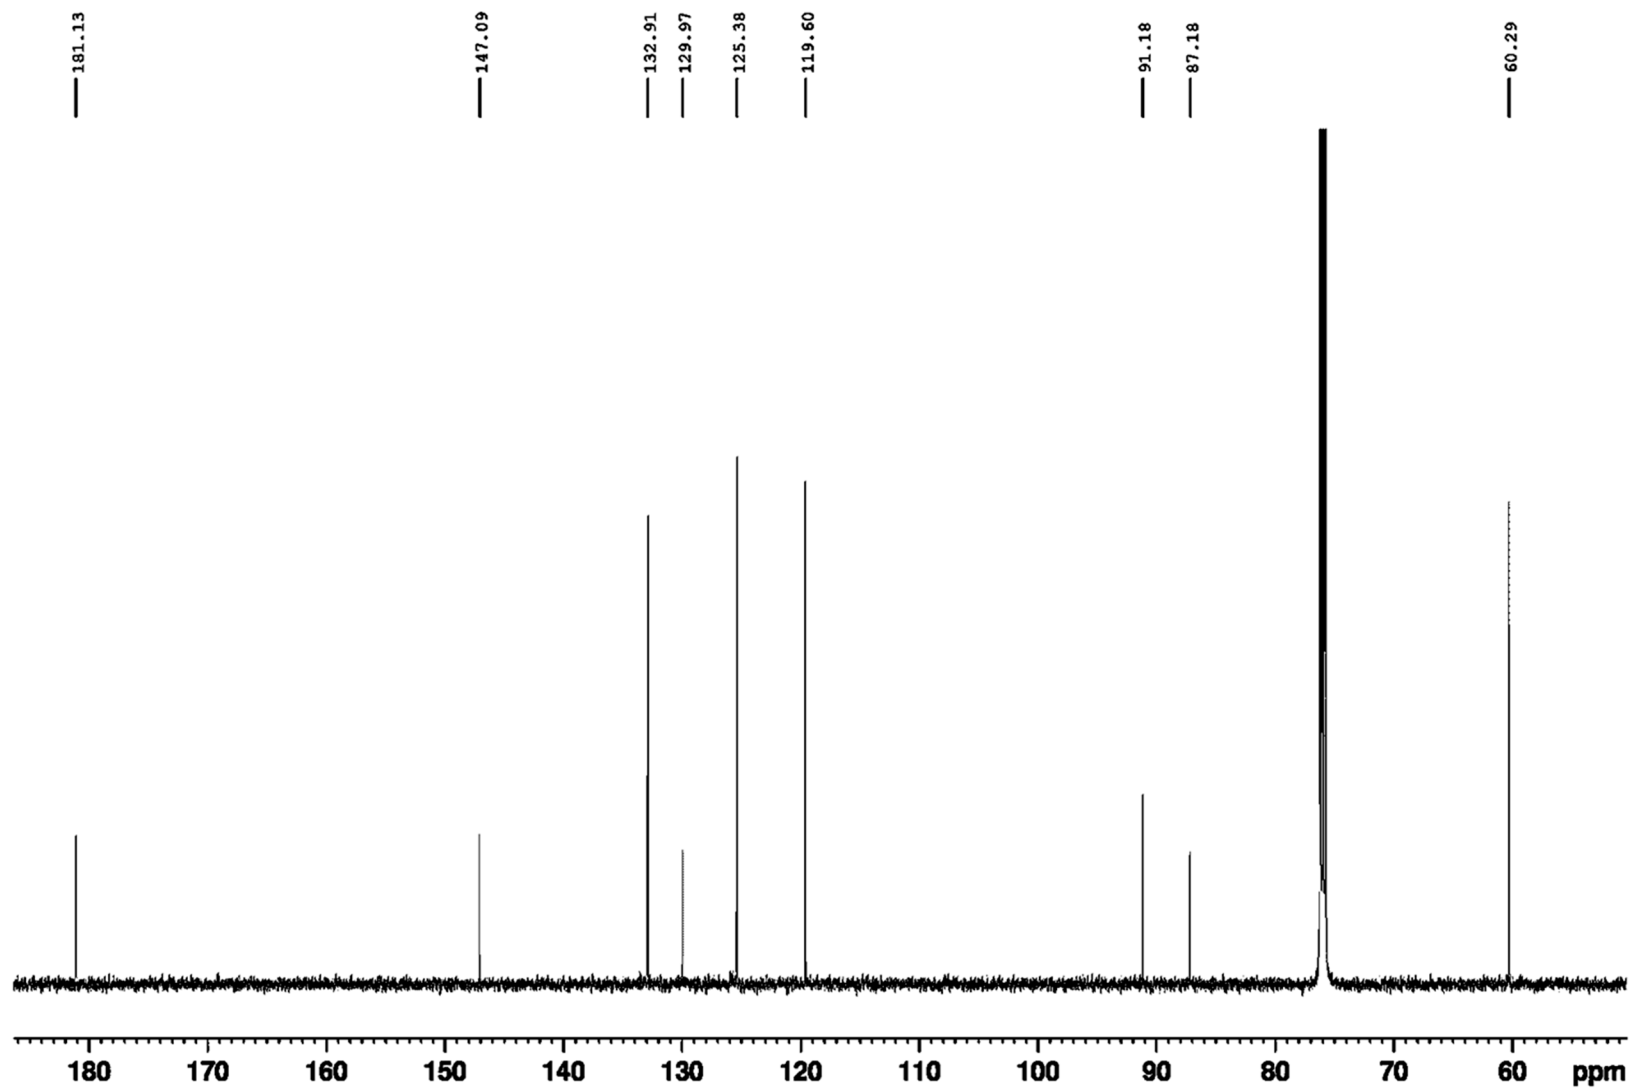

Figure S14 (b): <sup>13</sup>C-NMR spectrum of 8-octen-6,10-diyne-1,4-dioxocyclododeca[2,3-g]-1,4-naphthoquinon (26).

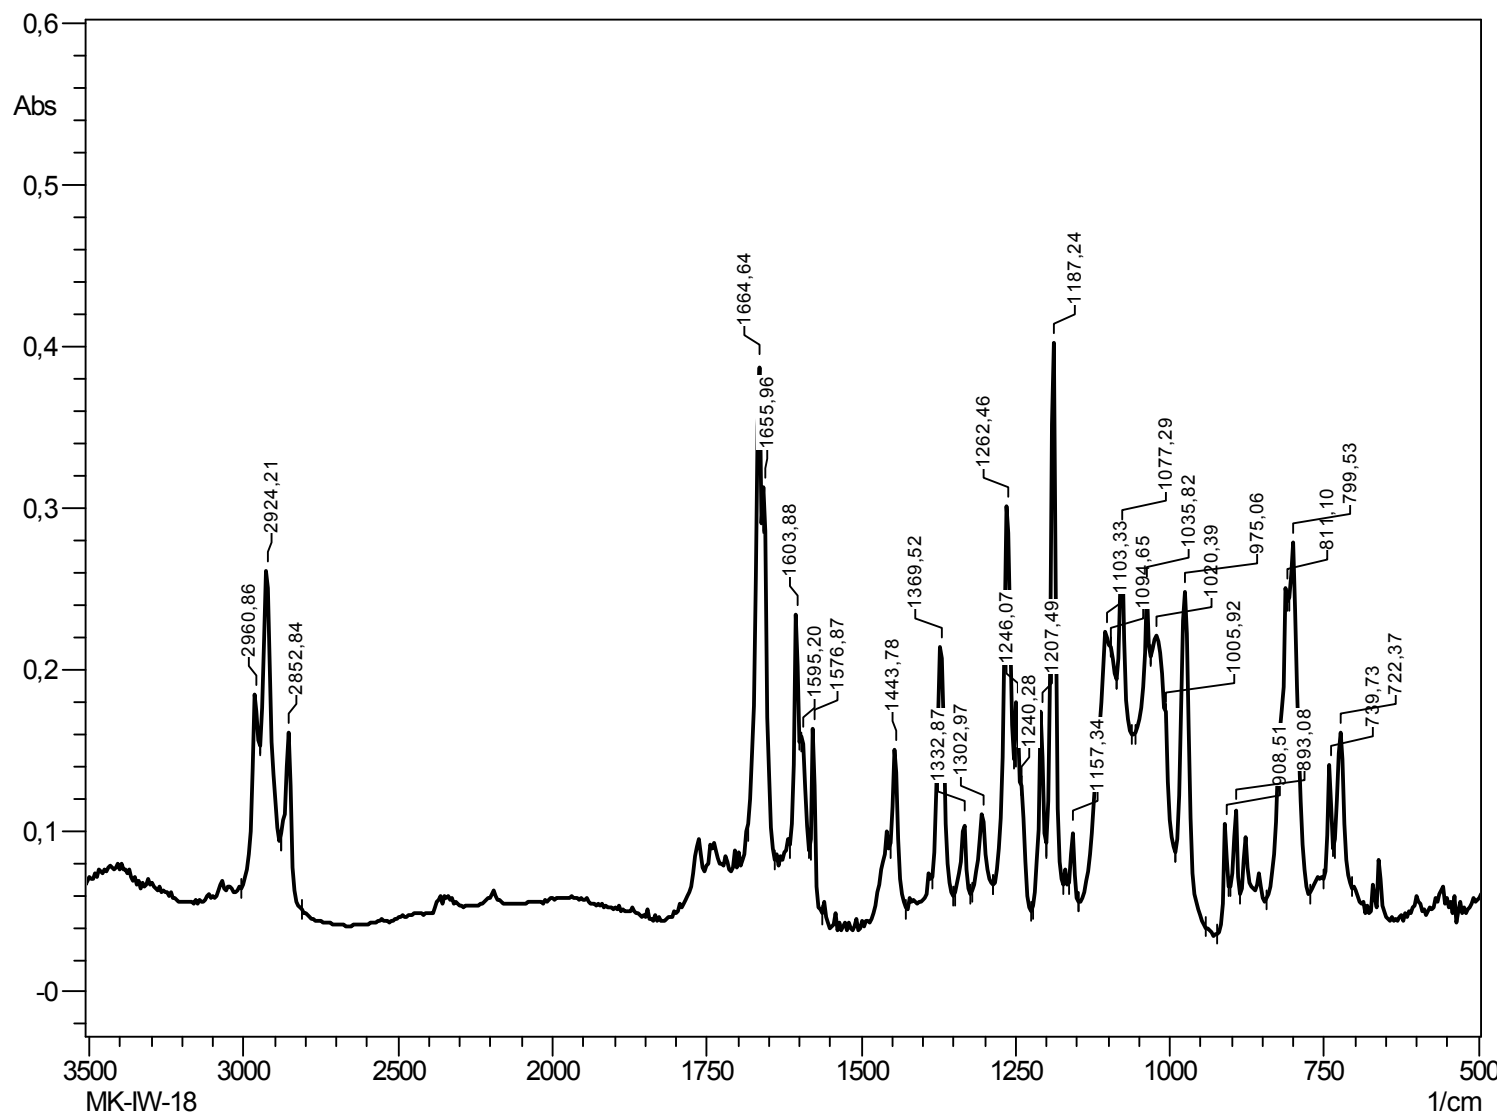

Figure S14 (c): IR spectrum of 8-octen-6,10-diynyl-1,4-dioxocyclododeca[2,3-g]-1,4-naphthoquinon (26).

# Compound Spectrum List Report

## Analysis Info

Analysis Name D:\Data\mk26.d  
Method low\_mass.m  
Sample Name TM Low concentration  
Comment

Acquisition Date 2/17/2017 12:03:36 PM  
Operator KM  
Instrument impact II 1825265.10082

## Acquisition Parameter

|             |          |                      |          |                  |           |
|-------------|----------|----------------------|----------|------------------|-----------|
| Source Type | ESI      | Ion Polarity         | Positive | Set Nebulizer    | 0.3 Bar   |
| Focus       | Active   | Set Capillary        | 4000 V   | Set Dry Heater   | 240 °C    |
| Scan Begin  | 100 m/z  | Set End Plate Offset | -500 V   | Set Dry Gas      | 4.0 l/min |
| Scan End    | 1000 m/z | Set Charging Voltage | 2000 V   | Set Divert Valve | Source    |
|             |          | Set Corona           | 0 nA     | Set APCI Heater  | 0 °C      |

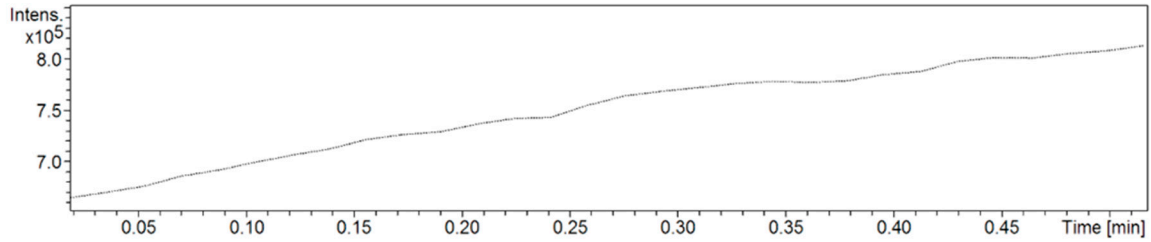

## +MS, 0.0-0.5min #1-30

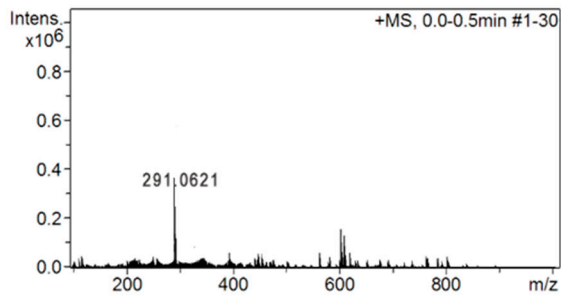

| # | m/z      | Res.  | S/N    | I      | I%    | FWHM   |
|---|----------|-------|--------|--------|-------|--------|
| 1 | 291.0621 | 32157 | 4727.8 | 554451 | 100.0 | 0.0085 |

**Figure S14 (d):** HR-MS spectrum of 8-octen-6,10-diynyl-1,4-dioxocyclododeca[2,3-g]-1,4-naphthoquinon (**26**).

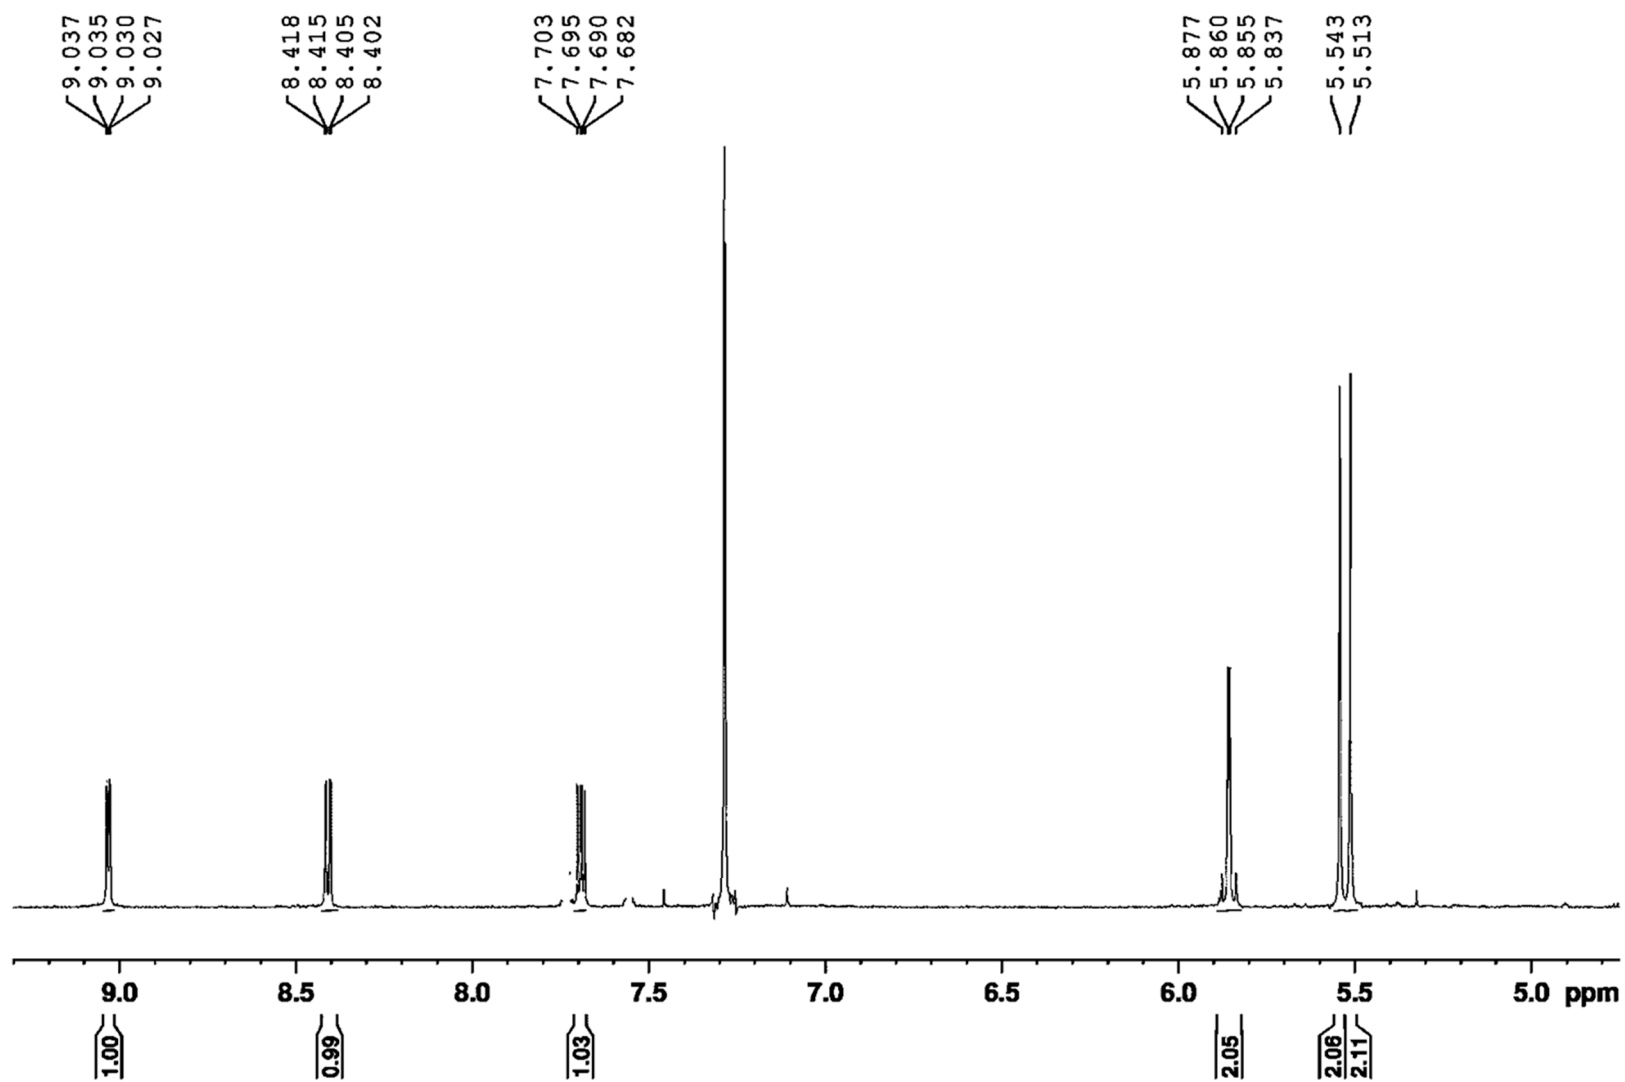

Figure S15 (a):  $^{13}\text{C}$ -NMR spectrum of 8-octen-6,10-diynyl-1,4-dioxocyclododeca[2,3-g]-5,8-quinolinedione (27).

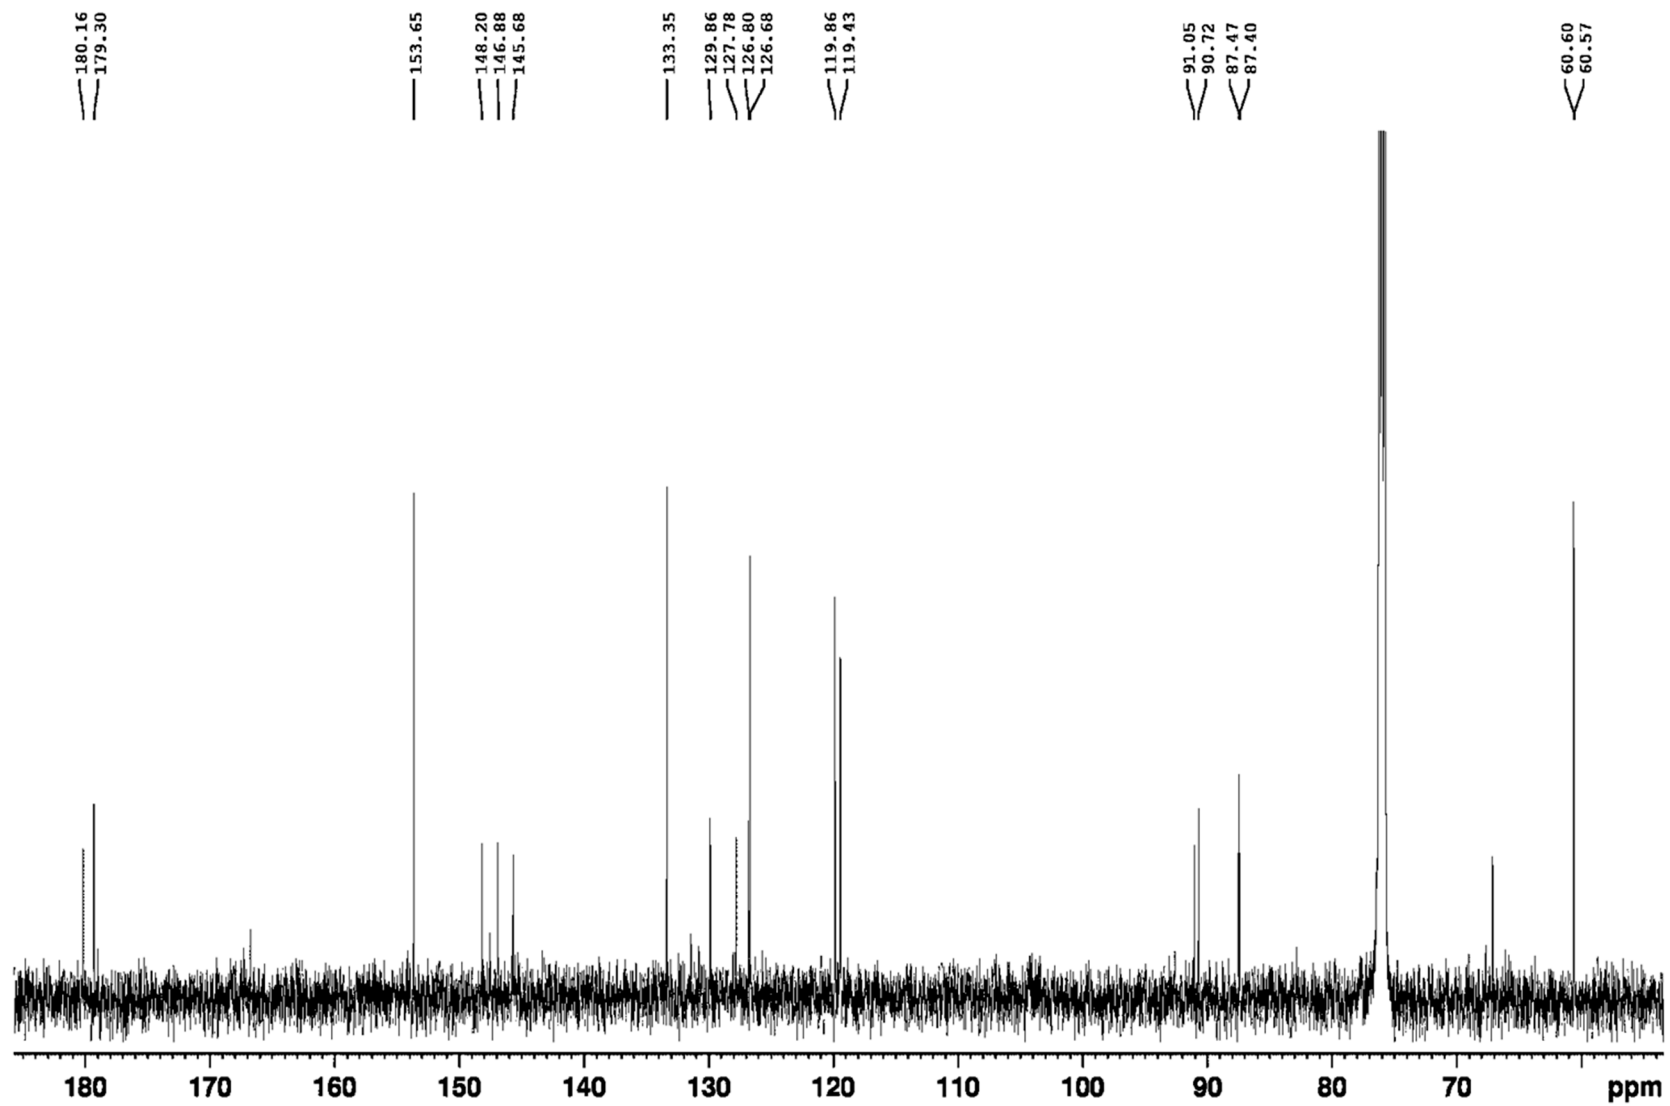

Figure S15 (b):  $^{13}\text{C}$ -NMR spectrum of 8-octen-6,10-diynyl-1,4-dioxocyclododeca[2,3-g]-5,8-quinolinedione (27).

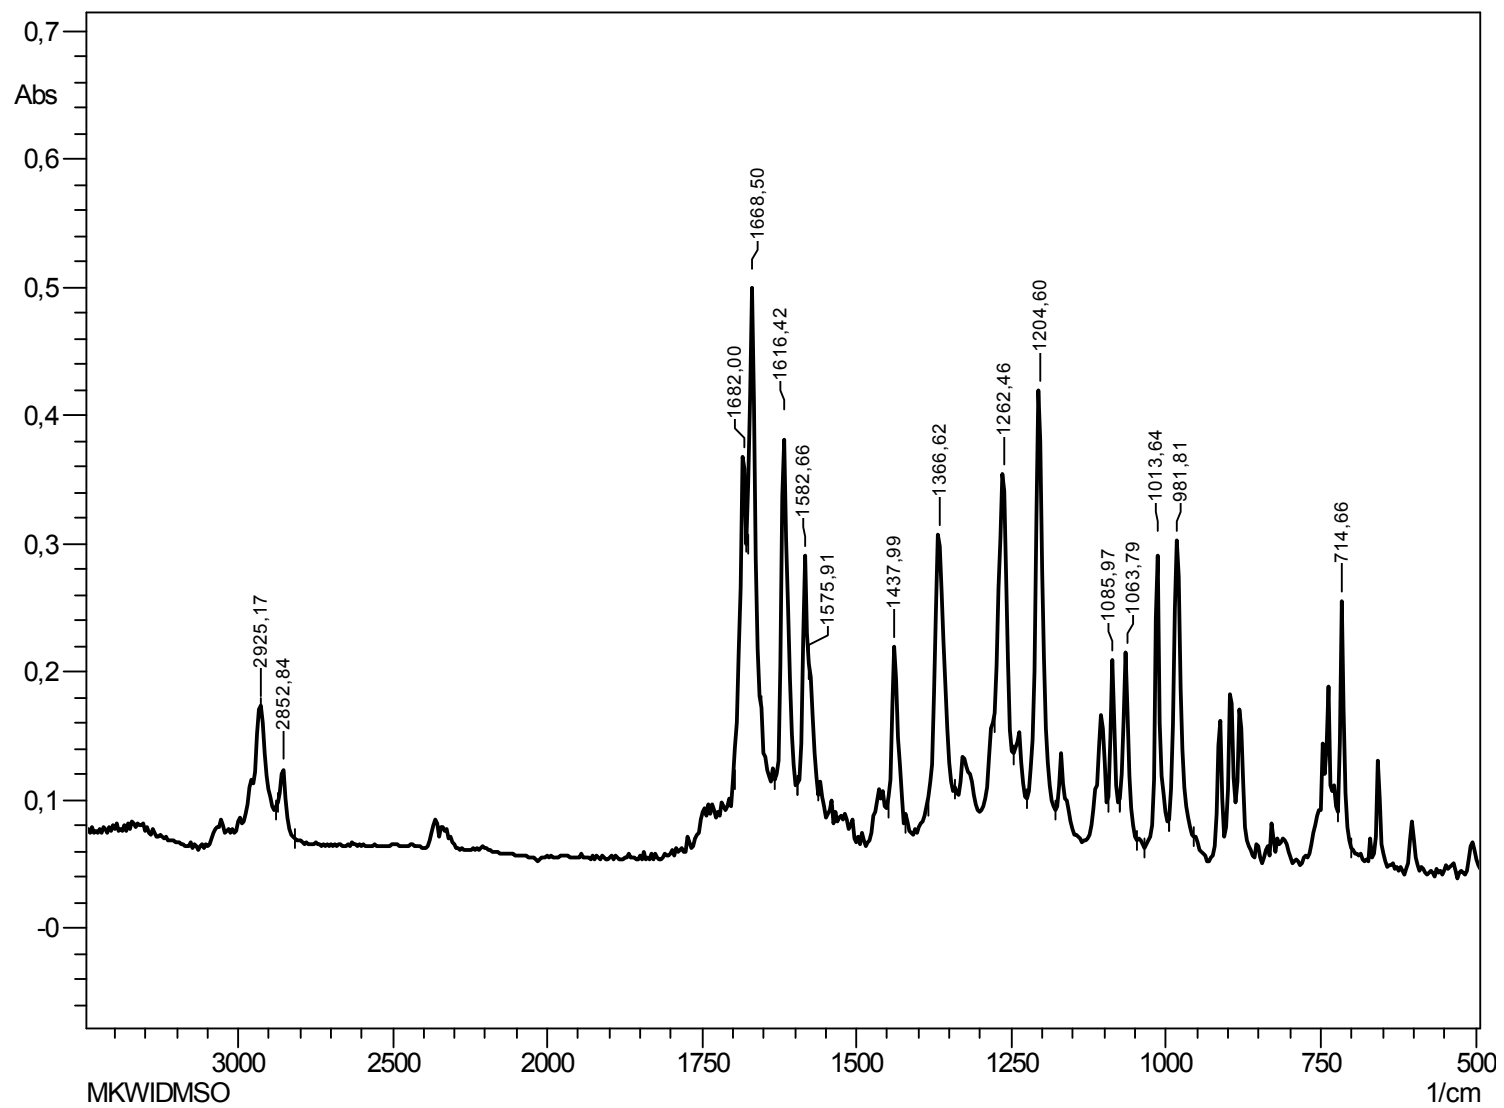

Figure S15 (c): IR spectrum of 8-octen-6,10-diynyl-1,4-dioxocyclododeca[2,3-g]-5,8-quinolinedione (27).

# Compound Spectrum List Report

## Analysis Info

Analysis Name D:\Data\mk27.d  
Method low\_mass.m  
Sample Name TM Low concentration  
Comment

Acquisition Date 2/17/2017 12:06:09 PM  
Operator KM  
Instrument impact II 1825265.10082

## Acquisition Parameter

|             |          |                      |          |                  |           |
|-------------|----------|----------------------|----------|------------------|-----------|
| Source Type | ESI      | Ion Polarity         | Positive | Set Nebulizer    | 0.3 Bar   |
| Focus       | Active   | Set Capillary        | 4000 V   | Set Dry Heater   | 240 °C    |
| Scan Begin  | 100 m/z  | Set End Plate Offset | -500 V   | Set Dry Gas      | 4.0 l/min |
| Scan End    | 1000 m/z | Set Charging Voltage | 2000 V   | Set Divert Valve | Source    |
|             |          | Set Corona           | 0 nA     | Set APCI Heater  | 0 °C      |

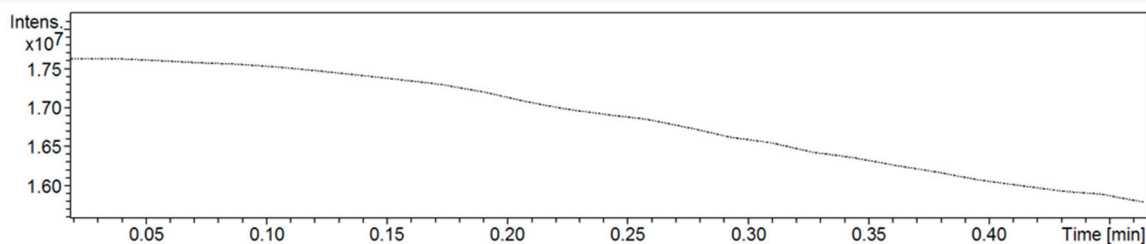

## +MS, 0.0-0.5min #1-27

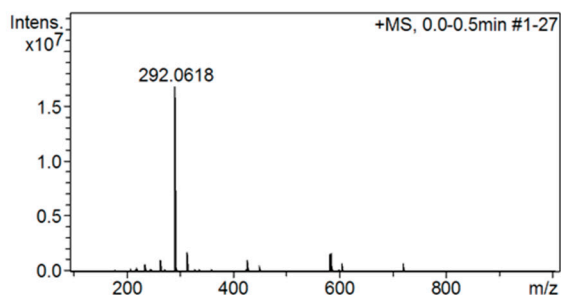

| # | m/z      | Res.  | S/N     | I        | I%    | FWHM   |
|---|----------|-------|---------|----------|-------|--------|
| 1 | 292.0618 | 38253 | 86879.0 | 16857124 | 100.0 | 0.0076 |

**Figure S15 (d):** HR-MS spectrum of 8-octen-6,10-diynyl-1,4-dioxocyclododeca[2,3-g]-5,8-quinolinedione (27).

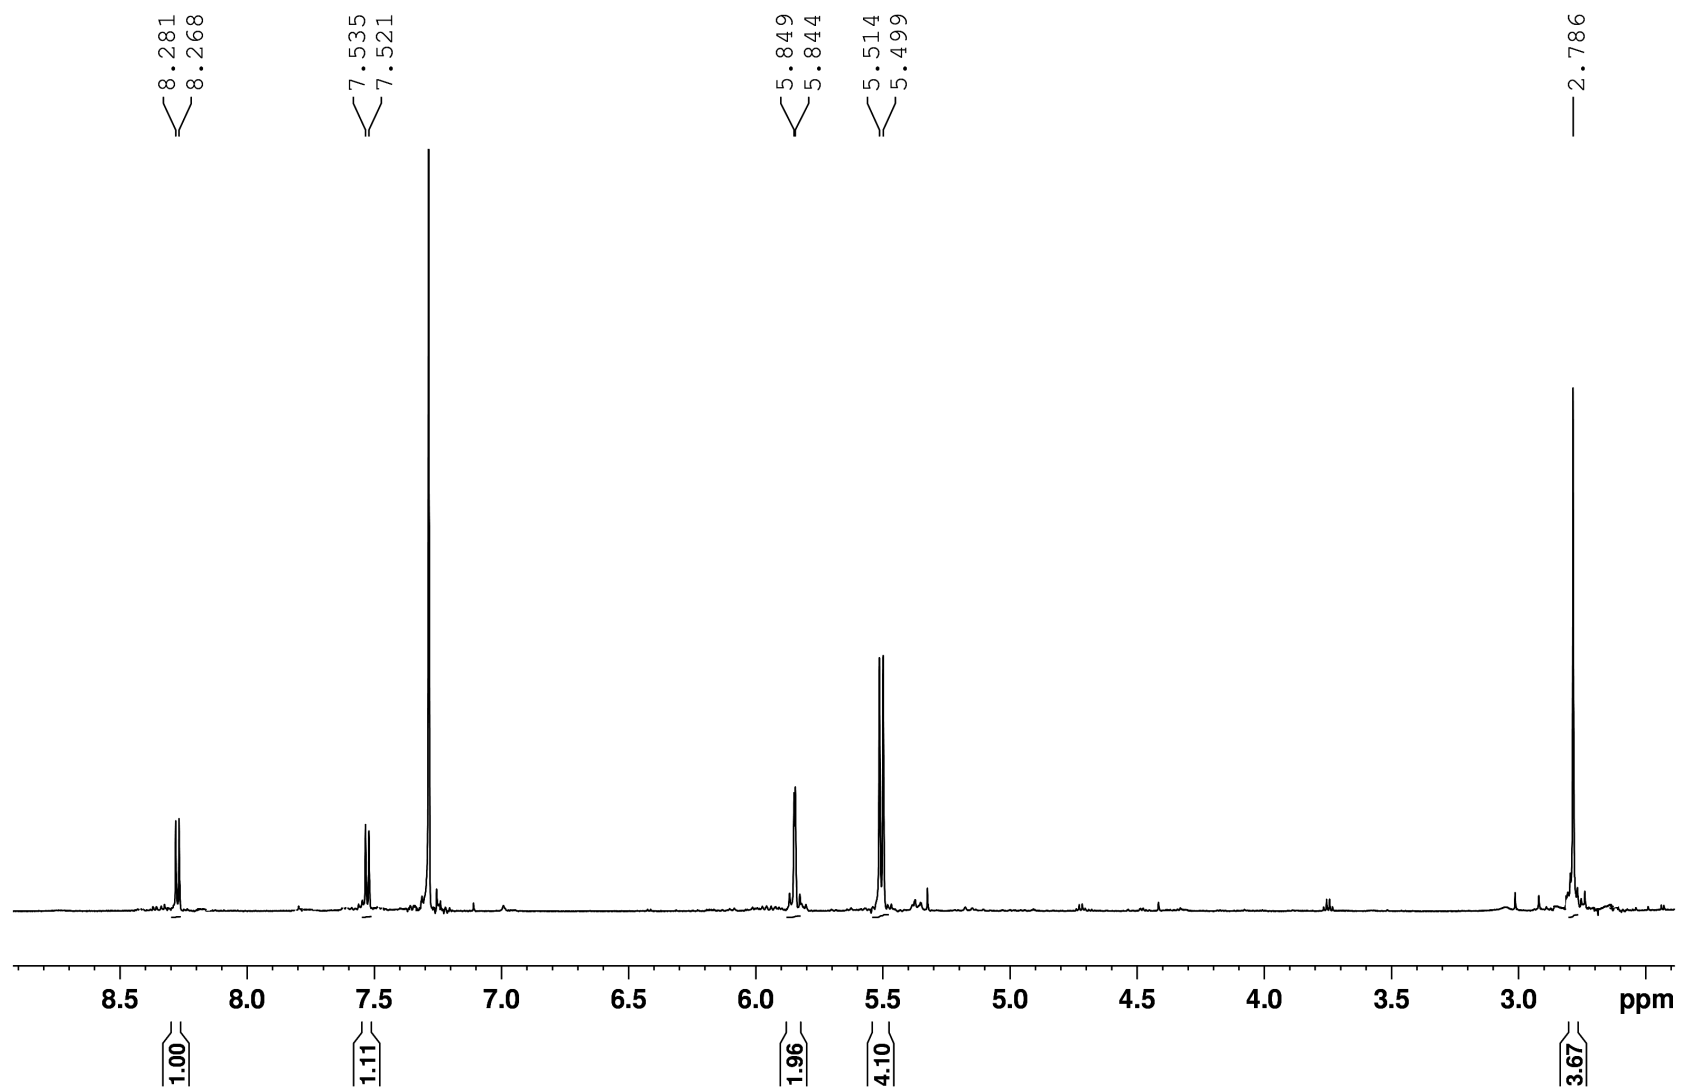

Figure S16 (a): <sup>1</sup>H-NMR spectrum of 8-octen-6,10-diynyl-1,4-8-octen-6,10-diynyl-1,4-dioxocyclododeca[2,3-g]-2-methyl-5,8-quinolinedione (**28**).



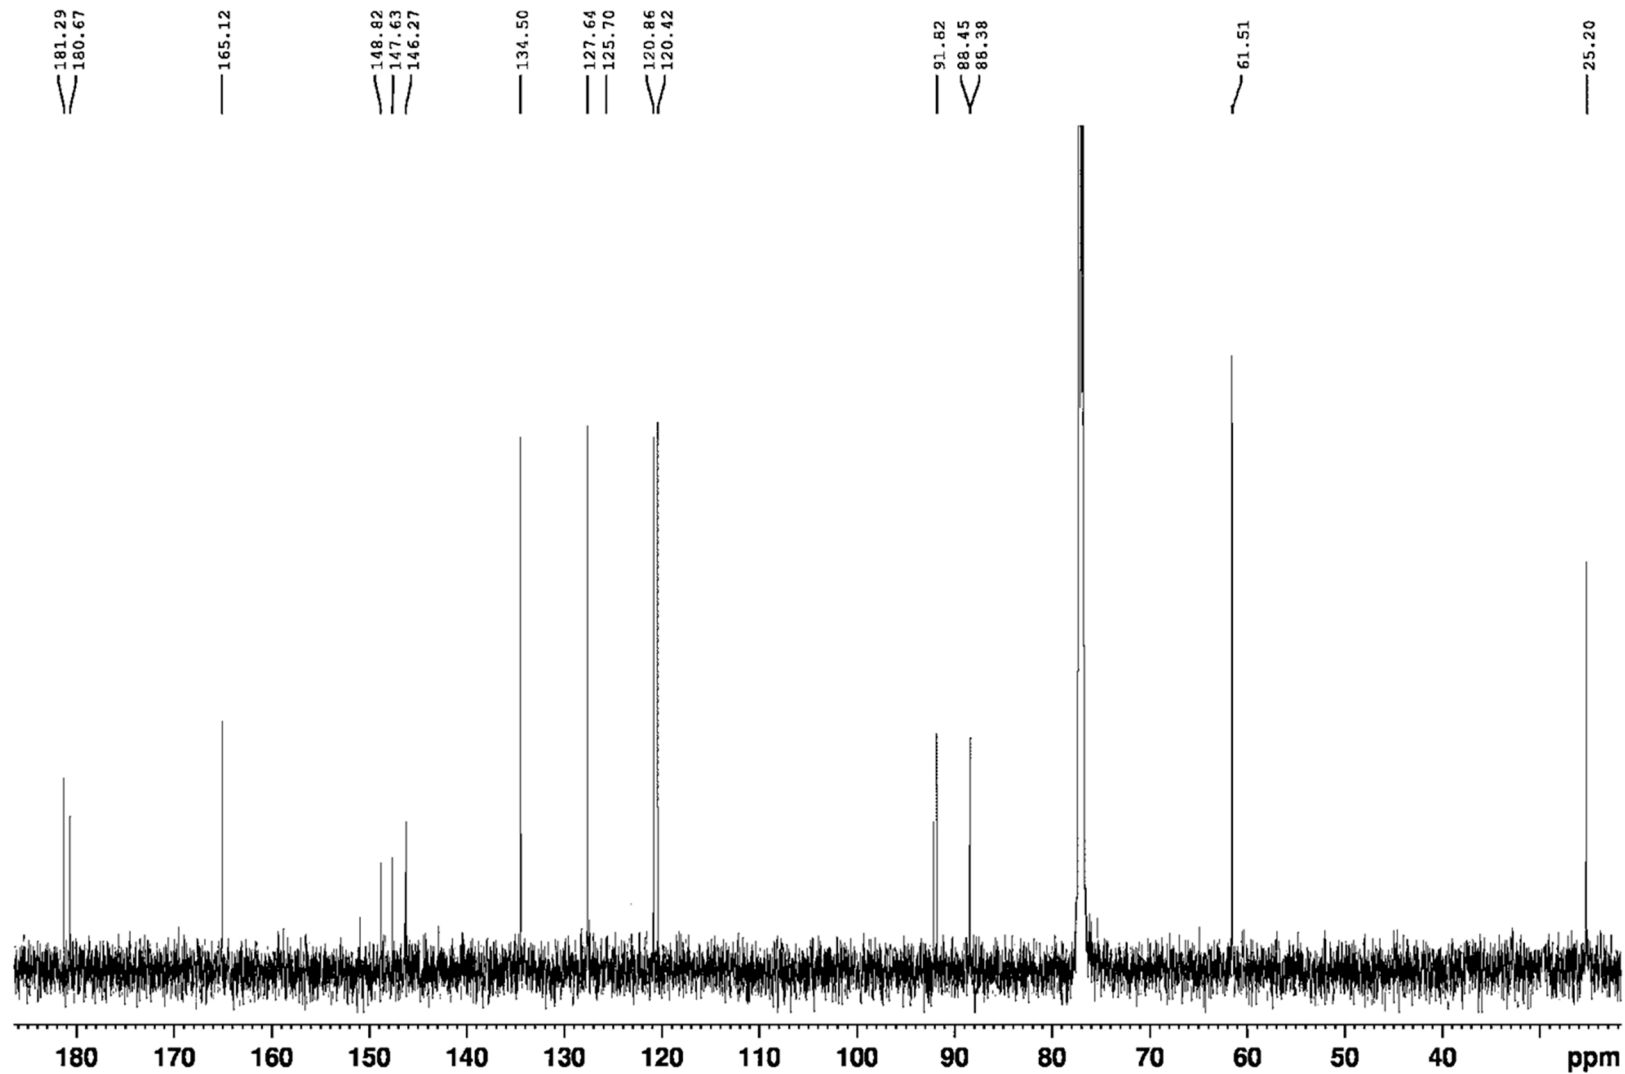

Figure S16 (b): <sup>13</sup>C-NMR spectrum of 8-octen-6,10-diynyl-1,4-8-octen-6,10-diynyl-1,4-dioxocyclododeca[2,3-g]-2-methyl-5,8-quinolinedione (28).

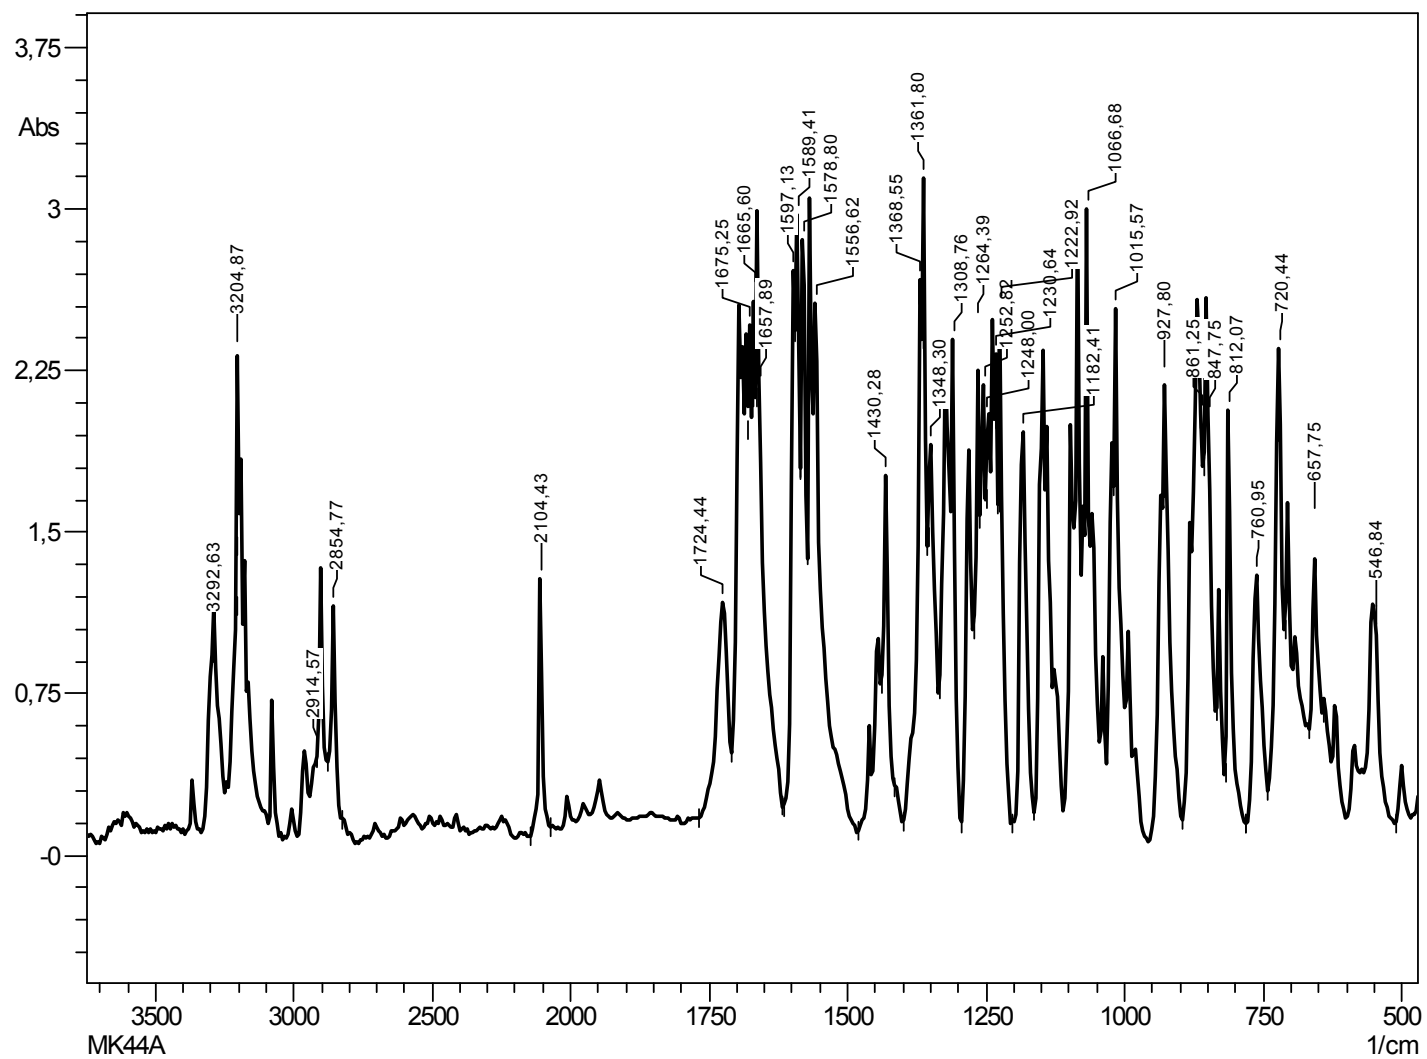

Figure S16 (c): IR spectrum of 8-octen-6,10-diynyl-1,4-8-octen-6,10-diynyl-1,4-dioxocyclododeca[2,3-g]-2-methyl-5,8-quinolinedione (28).

# Compound Spectrum List Report

## Analysis Info

Analysis Name D:\Data\mk28.d  
Method low\_mass.m  
Sample Name TM Low concentration  
Comment

Acquisition Date 2/17/2017 12:08:53 PM  
Operator KM  
Instrument impact II 1825265.10082

## Acquisition Parameter

|             |          |                      |          |                  |           |
|-------------|----------|----------------------|----------|------------------|-----------|
| Source Type | ESI      | Ion Polarity         | Positive | Set Nebulizer    | 0.3 Bar   |
| Focus       | Active   | Set Capillary        | 4000 V   | Set Dry Heater   | 240 °C    |
| Scan Begin  | 100 m/z  | Set End Plate Offset | -500 V   | Set Dry Gas      | 4.0 l/min |
| Scan End    | 1000 m/z | Set Charging Voltage | 2000 V   | Set Divert Valve | Source    |
|             |          | Set Corona           | 0 nA     | Set APCI Heater  | 0 °C      |

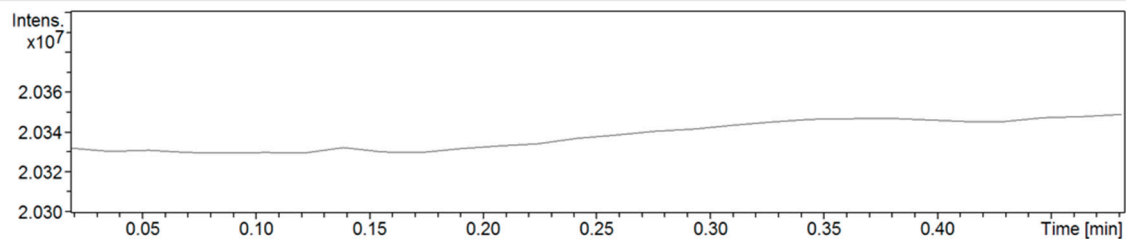

## +MS, 0.0-0.4min #2-25

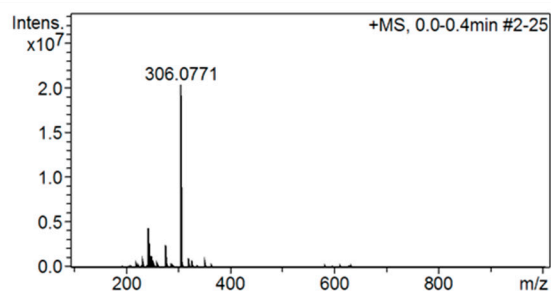

| # | m/z      | Res.  | S/N     | I        | I%    | FWHM   |
|---|----------|-------|---------|----------|-------|--------|
| 1 | 243.9932 | 36038 | 24252.1 | 4473754  | 22.0  | 0.0068 |
| 2 | 306.0771 | 25949 | 61360.4 | 20337186 | 100.0 | 0.0118 |

**Figure S16 (d):** HR-MS spectrum of 8-octen-6,10-diynyl-1,4-8-octen-6,10-diynyl-1,4-dioxocyclododeca[2,3-g]-2-methyl-5,8-quinolinedione (**28**).
